# Supplementary material for: Detection and spread of high pathogenicity avian influenza virus H5N1 in the Antarctic Region
Source: PubMed Central journal article supplement (PMC11372179; doi:10.1038/s41467-024-51490-8), 2024-09-03
Supplement: 41467_2024_51490_MOESM1_ESM.pdf [file 41467_2024_51490_MOESM1_ESM.pdf]

**Supplementary Figure 1. Phylogenetic analysis of all influenza A virus gene segments from detections in the Falkland Islands and South Georgia.** Representative global H5N1 HPAIV sequences collected since 1st September 2020 were combined with the sequences generated from samples collected from South Georgia and the Falkland Islands and used to infer maximum likelihood phylogenetic trees of (A) PB2, PB1, PA and HA and (B) NP, NA, MP and NS. Tips are coloured according to region of origin, and the sequences from South Georgia and the Falkland Islands are indicated.

**A**

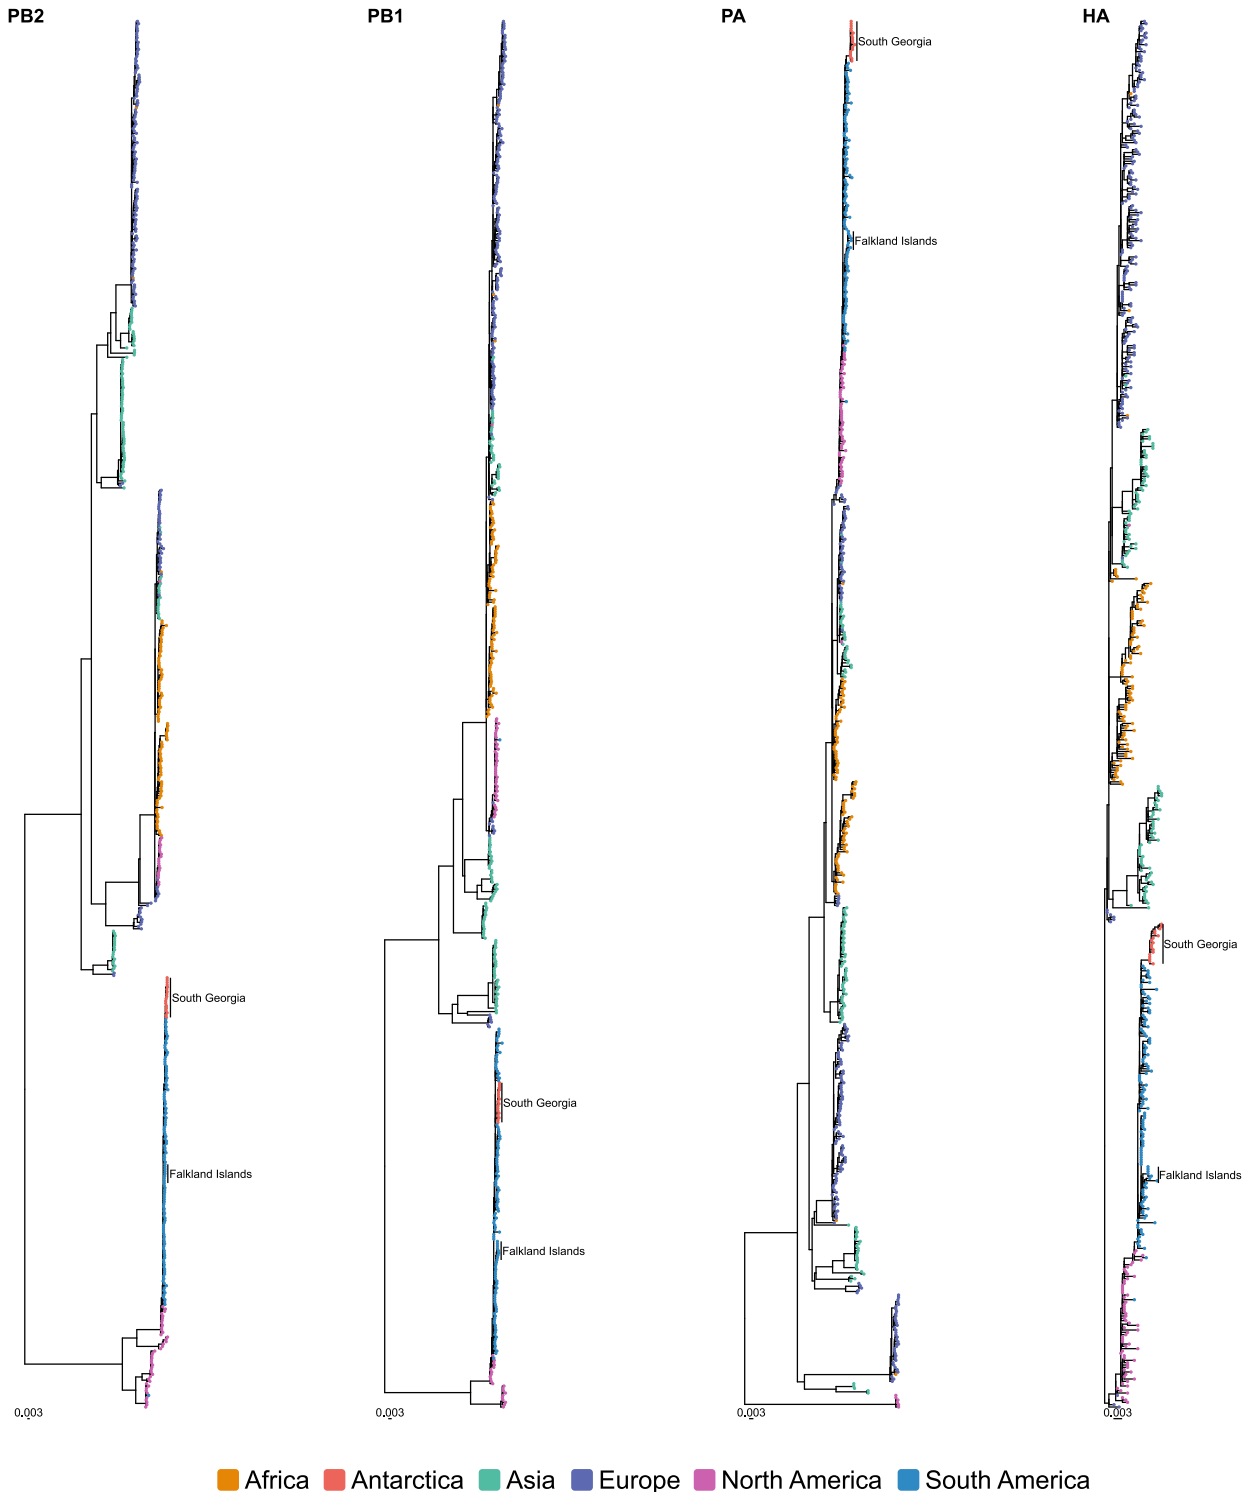

# B

NP

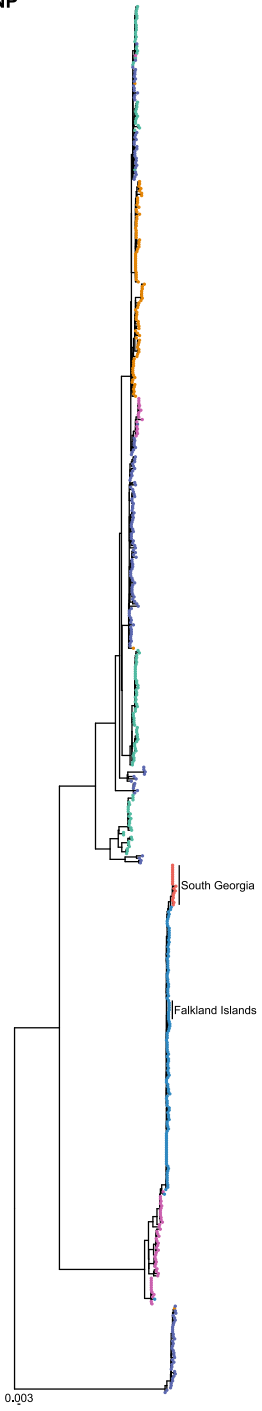

NA

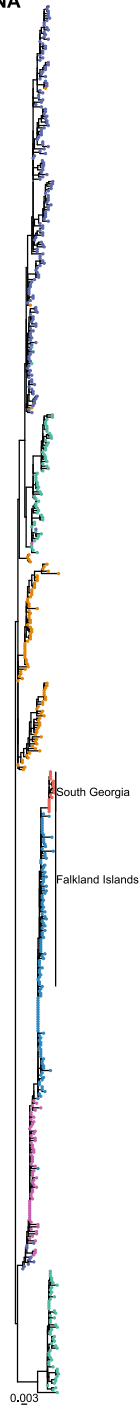

MP

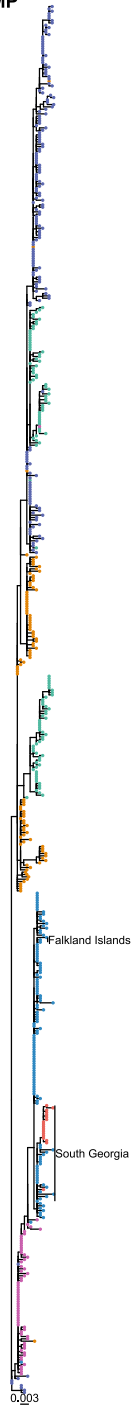

NS

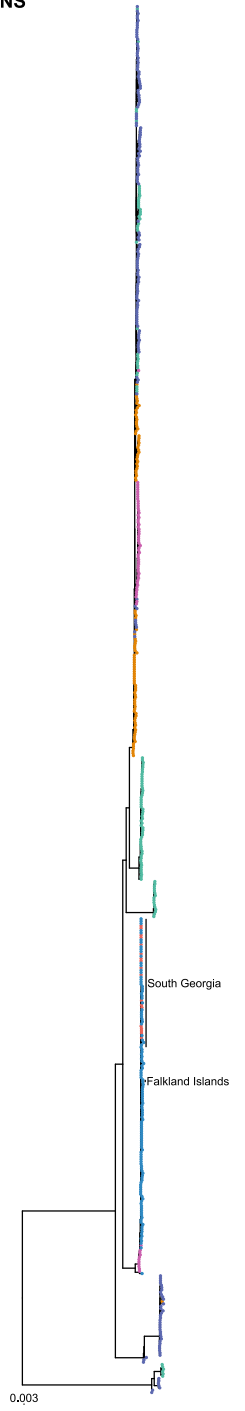

■ Africa ■ Antarctica ■ Asia ■ Europe ■ North America ■ South America

**Supplementary Figure 2. Extended maximum clade credibility (MCC) phylogeny of the HA gene by BEAST analysis. Extension to Figure 2A including strain names at branch termini.**

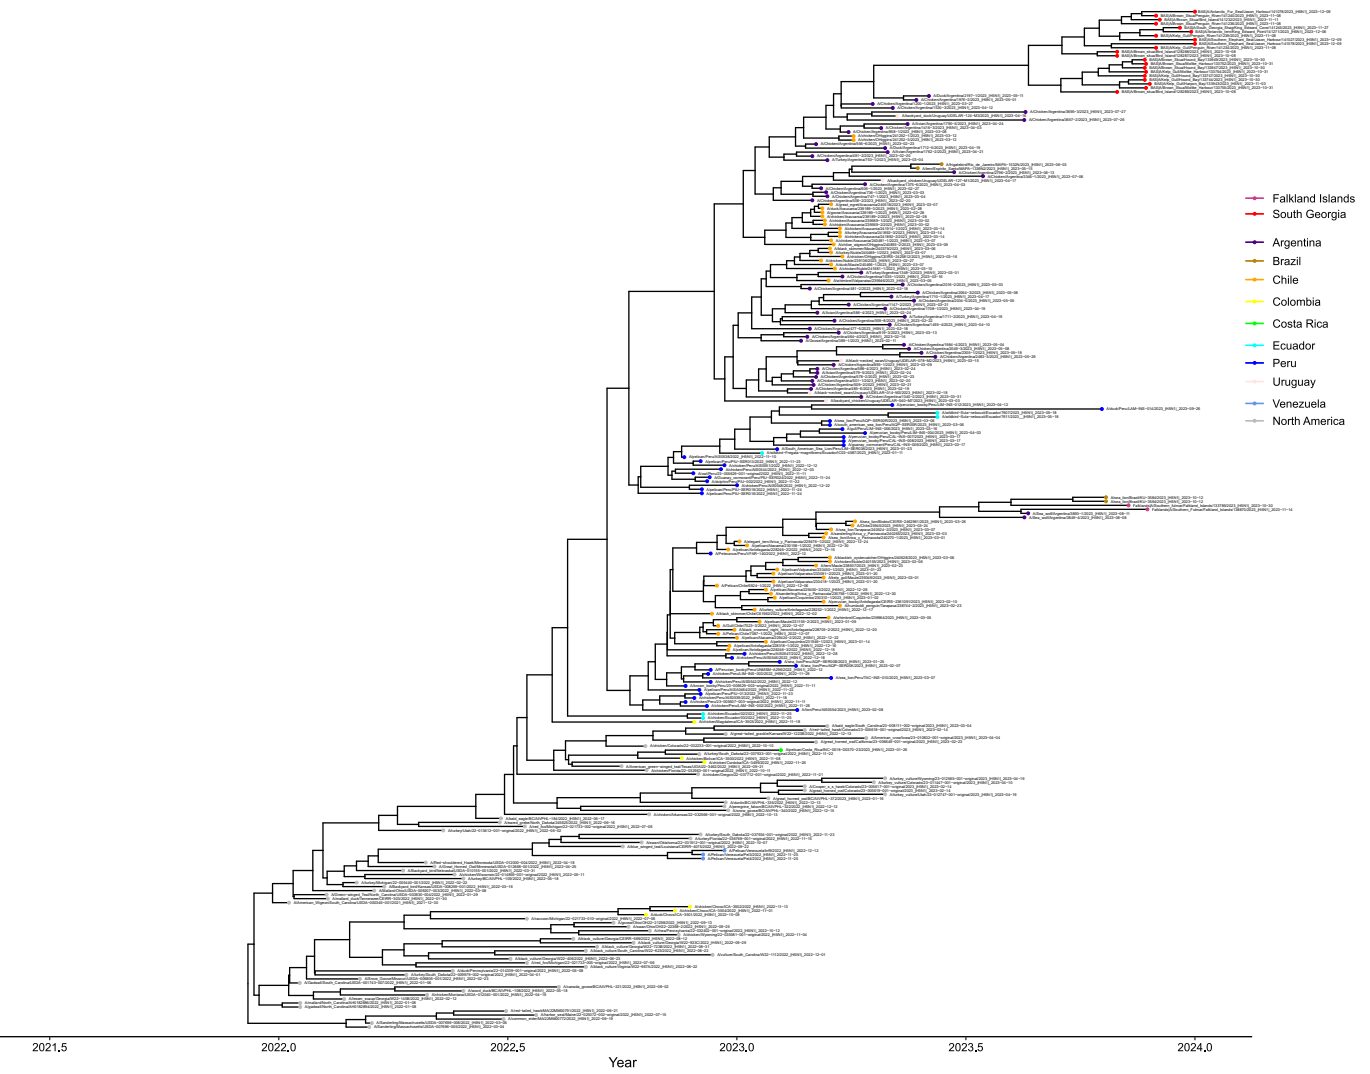

**Supplementary Table 1: Summary of date, location and species of avian samples collected, and testing result for H5N1 HPAIV from South Georgia and the Falklands Islands.** a, RRT-PCR interpretation from M-gene, H5-HP and N1; b, virus isolation in embryonated fowl eggs; c, oropharyngeal (OP); d, cloacal (C); e, not performed (N/P); f, not applicable (N/A); g, sequence derived from egg amplified material; h, performed but could not be determined (ND); -, No Cq.

| Location                   | Collection date | Common name                     | Scientific name                 | Swab type       | RRT-PCR assay |       |                   | RRT-PCR Interpretation <sup>a</sup> | Virus isolation <sup>b</sup>         | Virus strain name                     | NCBI Accession numbers sequential across segments (GISAID accession number) |
|----------------------------|-----------------|---------------------------------|---------------------------------|-----------------|---------------|-------|-------------------|-------------------------------------|--------------------------------------|---------------------------------------|-----------------------------------------------------------------------------|
|                            |                 |                                 |                                 |                 | M-gene        | H5-HP | N1                |                                     |                                      |                                       |                                                                             |
| Bird Island, South Georgia | 08/10/2023      | Brown skua                      | <i>Stercorarius antarcticus</i> | OP <sup>c</sup> | 28.46         | 27.75 | 29.82             | <b>H5N1 HPAIV</b>                   | Negative                             | A/brown_skua/Bird_Island/128287/2023  | PQ129499- PQ129506 (EPI_ISL_18439562)                                       |
|                            |                 |                                 |                                 | C <sup>d</sup>  | 27.1          | 26.2  | 28.3              | <b>H5N1 HPAIV</b>                   | Negative                             | N/P <sup>e</sup>                      | N/A <sup>f</sup>                                                            |
|                            |                 | Brown skua                      | <i>Stercorarius antarcticus</i> | OP              | 28.09         | 26.25 | 28.99             | <b>H5N1 HPAIV</b>                   | Negative                             | A/brown_skua/Bird_Island/128288/2023  | PQ129515- PQ129522 (EPI_ISL_18439563)                                       |
|                            |                 |                                 |                                 | C               | 35.01         | 33.65 | 35.69             | <b>H5N1 HPAIV</b>                   | Negative                             | N/P                                   | N/A                                                                         |
|                            | Brown skua      | <i>Stercorarius antarcticus</i> | OP                              | 31.07           | 30.16         | 32.36 | <b>H5N1 HPAIV</b> | Negative                            | A/brown_skua/Bird_Island/128289/2023 | PQ129507- PQ129514 (EPI_ISL_18439564) |                                                                             |
|                            |                 |                                 | C                               | 32.63           | 31.85         | 33.87 | <b>H5N1 HPAIV</b> | Negative                            | N/P                                  | N/A                                   |                                                                             |
|                            | 11/11/2023      | Brown skua                      | <i>Stercorarius antarcticus</i> | OP              | 28.91         | 27.91 | 28.37             | <b>H5N1 HPAIV</b>                   | Negative                             | A/brown_skua/Bird_Island/141232/2023  | PQ114066-PQ114073 (EPI_ISL_18742214)                                        |
|                            |                 |                                 |                                 | C               | -             | -     | 38.04             | Negative                            | Negative                             | N/P                                   | N/A                                                                         |
| Hound Bay, South Georgia   | 30/10/2023      | Kelp gull                       | <i>Larus dominicanus</i>        | C               | -             | -     | -                 | Negative                            | N/P                                  | N/P                                   | N/A                                                                         |
|                            |                 |                                 |                                 | OP              | 27.27         | 25.24 | 27.96             | <b>H5N1 HPAIV</b>                   | Negative                             | A/kelp_gull/Hound_Bay/133744/2023     | PQ114082-PQ114089 (EPI_ISL_18592422)                                        |
|                            |                 | Brown skua                      | <i>Stercorarius antarcticus</i> | C               | 32.36         | 29.52 | 32.75             | <b>H5N1 HPAIV</b>                   | <b>Positive</b>                      | A/brown_skua/Hound_Bay/133947/2023    | PQ114034 -PQ114041 (EPI_ISL_18592428)                                       |
|                            |                 |                                 |                                 | OP              | 32.31         | 29.87 | 32.09             | <b>H5N1 HPAIV</b>                   | N/P                                  | N/P                                   | N/A                                                                         |
|                            |                 | Kelp gull                       | <i>Larus dominicanus</i>        | C               | -             | -     | -                 | Negative                            | N/P                                  | N/P                                   | N/A                                                                         |
|                            |                 |                                 |                                 | OP              | 35.89         | 34.71 | 35.8              | <b>H5N1 HPAIV</b>                   | Negative                             | N/P                                   | N/A                                                                         |
|                            |                 | Kelp gull                       | <i>Larus dominicanus</i>        | C               | -             | -     | 37.81             | Negative                            | N/P                                  | N/P                                   | N/A                                                                         |
|                            |                 |                                 |                                 | OP              | 28.18         | 26.27 | 29.22             | <b>H5N1 HPAIV</b>                   | <b>Positive</b>                      | A/kelp_gull/Hound_Bay/133747/2023     | PQ114074-PQ114081 (EPI_ISL_18592423)                                        |
|                            |                 | Brown skua                      | <i>Stercorarius antarcticus</i> | C               | 28.86         | 26.87 | 29.88             | <b>H5N1 HPAIV</b>                   | Negative                             | N/P                                   | N/A                                                                         |
|                            |                 |                                 |                                 | OP              | 29.61         | 27.84 | 30.53             | <b>H5N1 HPAIV</b>                   | N/P                                  | N/P                                   | N/A                                                                         |
|                            |                 | Brown skua                      | <i>Stercorarius antarcticus</i> | C               | 26.92         | 24.65 | 27.28             | <b>H5N1 HPAIV</b>                   | <b>Positive</b>                      | A/brown_skua/Hound_Bay/133949/2023    | PQ114018-PQ114025 (EPI_ISL_18592429)                                        |
|                            |                 |                                 |                                 | OP              | 27.61         | 27.39 | 29.47             | <b>H5N1 HPAIV</b>                   | N/P                                  | N/P                                   | N/A                                                                         |
|                            |                 |                                 |                                 |                 |               | C     | 36.31             | 35.76                               | 36.67                                | <b>H5N1 HPAIV</b>                     | N/P                                                                         |

|                                |            |            |                                 |    |       |       |       |            |          |                                         |                                      |
|--------------------------------|------------|------------|---------------------------------|----|-------|-------|-------|------------|----------|-----------------------------------------|--------------------------------------|
| St Andrew's Bay, South Georgia |            | Brown skua | <i>Stercorarius antarcticus</i> | OP | 29.34 | 26.5  | 28.64 | H5N1 HPAIV | Negative | N/P                                     | N/A                                  |
|                                |            | Brown skua | <i>Stercorarius antarcticus</i> | C  | 32.43 | 30.89 | 33.86 | H5N1 HPAIV | Negative | N/P                                     | N/A                                  |
| Moltke Harbour, South Georgia  | 31/10/2023 | Brown skua | <i>Stercorarius antarcticus</i> | OP | 34.98 | 31.47 | 34.54 | H5N1 HPAIV | N/P      | N/P                                     | N/A                                  |
|                                |            |            |                                 | C  | -     | -     | -     | Negative   | N/P      | N/P                                     | N/A                                  |
|                                |            | Kelp gull  | <i>Larus dominicanus</i>        | OP | 31.43 | 28.42 | 31.77 | H5N1 HPAIV | Negative | A/brown_skua/Moltke_Harbour/133752/2023 | PQ113986-PQ113993 (EPI_ISL_18592424) |
|                                |            |            |                                 | C  | -     | -     | -     | Negative   | N/P      | N/P                                     | N/A                                  |
|                                |            | Kelp gull  | <i>Larus dominicanus</i>        | OP | 36.29 | 33.65 | 35.55 | H5N1 HPAIV | Negative | N/P                                     | N/A                                  |
|                                |            |            |                                 | C  | 38.84 | -     | 39.19 | Negative   | N/P      | N/P                                     | N/A                                  |
|                                |            | Brown skua | <i>Stercorarius antarcticus</i> | OP | 29.21 | 27.54 | 29.78 | H5N1 HPAIV | Positive | A/kelp_gull/Moltke_Harbour/133754/2023  | PQ113978-PQ113985 (EPI_ISL_18592425) |
|                                |            |            |                                 | C  | 30.65 | 28.43 | 31.7  | H5N1 HPAIV | N/P      | N/P                                     | N/A                                  |
|                                |            | Brown skua | <i>Stercorarius antarcticus</i> | OP | 27.25 | 25.51 | 28.42 | H5N1 HPAIV | Positive | A/brown_skua/Moltke_Harbour/133755/2023 | PQ113970-PQ113977 (EPI_ISL_18592426) |
|                                |            |            |                                 | C  | 32.66 | 30.37 | 33.76 | H5N1 HPAIV | N/P      | N/P                                     | N/A                                  |
|                                |            | Kelp gull  | <i>Larus dominicanus</i>        | OP | 30.87 | 29.32 | 31.65 | H5N1 HPAIV | Negative | N/P                                     | N/A                                  |
|                                |            |            |                                 | C  | -     | -     | -     | Negative   | N/P      | N/P                                     | N/A                                  |
|                                |            | Kelp gull  | <i>Larus dominicanus</i>        | OP | 29.97 | 28.92 | 31.5  | H5N1 HPAIV | Negative | N/P                                     | N/A                                  |
|                                |            |            |                                 | C  | 32.77 | 31.46 | 33.9  | H5N1 HPAIV | N/P      | N/P                                     | N/A                                  |
| Harpon Bay, South Georgia      | 03/11/2023 | Kelp gull  | <i>Larus dominicanus</i>        | OP | 30.67 | 28.51 | 31.04 | H5N1 HPAIV | Positive | A/kelp_gull/Harpon_Bay/133943/2023      | PQ113954-PQ113961 (EPI_ISL_18592427) |
|                                |            |            |                                 | C  | 30.09 | 29.26 | 31.53 | H5N1 HPAIV | N/P      | N/P                                     | N/A                                  |
|                                |            | Brown skua | <i>Stercorarius antarcticus</i> | OP | 27.4  | 24.62 | 27.54 | H5N1 HPAIV | Negative | N/P                                     | N/A                                  |
|                                |            |            |                                 | C  | 38.93 | -     | 37.63 | Negative   | N/P      | N/P                                     | N/A                                  |
|                                |            | Kelp gull  | <i>Larus dominicanus</i>        | OP | 31.93 | 29.55 | 32.32 | H5N1 HPAIV | Negative | N/P                                     | N/A                                  |
|                                |            |            |                                 | C  | -     | -     | -     | Negative   | N/P      | N/P                                     | N/A                                  |
|                                |            | Kelp gull  | <i>Larus dominicanus</i>        | OP | 36.53 | 33.81 | 35.96 | H5N1 HPAIV | Negative | N/P                                     | N/A                                  |
|                                |            |            |                                 | C  | 27.88 | 26.95 | 27.32 | H5N1 HPAIV | Negative | A/kelp_gull/Penguin_River/141234/2023   | PQ114058-PQ114085 (EPI_ISL_18742215) |
| Penguin River, South Georgia   | 08/11/2023 | Kelp gull  | <i>Larus dominicanus</i>        | C  | -     | -     | -     | Negative   | N/P      | N/P                                     | N/A                                  |
|                                |            |            |                                 | OP | 27.96 | 26.77 | 28.27 | H5N1 HPAIV | Negative | A/brown_skua/Penguin_River/141236/2023  | PQ114002-PQ114009 (EPI_ISL_18742216) |
|                                |            | Brown skua | <i>Stercorarius antarcticus</i> | C  | 35.95 | 35.41 | 35.53 | H5N1 HPAIV | N/P      | N/P                                     | N/A                                  |
|                                |            |            |                                 | OP | 34.41 | 33.4  | 34.16 | H5N1 HPAIV | N/P      | N/P                                     | N/A                                  |

|                                 |                           |                          |                                 |                                |       |       |            |            |                                                |                                                            |                                               |
|---------------------------------|---------------------------|--------------------------|---------------------------------|--------------------------------|-------|-------|------------|------------|------------------------------------------------|------------------------------------------------------------|-----------------------------------------------|
|                                 |                           |                          | <i>Larus dominicanus</i>        | C                              | 30.31 | 29.69 | 29.92      | H5N1 HPAIV | Negative                                       | A/kelp_gull/Penguin_River/141239/2023                      | PQ113994-PQ114001<br>(EPI_ISL_18742217)       |
|                                 |                           | Brown skua               | <i>Stercorarius antarcticus</i> | OP                             | 31.95 | 31.25 | 37.48      | H5N1 HPAIV | Negative                                       | A/brown_skua/Penguin_River/141240/2023                     | PQ114026-PQ114033<br>(EPI_ISL_18742218)       |
|                                 |                           |                          |                                 | C                              | 36.65 | 28.5  | 29.27      | H5N1 HPAIV | Negative                                       | N/P                                                        | N/A                                           |
| King Edward Cove, South Georgia | 25/11/2023                | South Georgia shag       | <i>Leucocarbo georgianus</i>    | OP                             | -     | -     | -          | Negative   | N/P                                            | N/P                                                        | N/A                                           |
|                                 |                           |                          |                                 | C                              | -     | -     | -          | Negative   | N/P                                            | N/P                                                        | N/A                                           |
|                                 | 27/11/2023                | South Georgia shag       | <i>Leucocarbo georgianus</i>    | OP                             | 34.7  | 27.59 | 31.3       | H5N1 HPAIV | N/P                                            | N/P                                                        | N/A                                           |
|                                 |                           |                          |                                 | C                              | 26.66 | 19.9  | 23.62      | H5N1 HPAIV | Positive                                       | A/South_Georgia_shag/King_Edward_Cove/141245/2023          | PQ114010-PQ114017<br>(EPI_ISL_18742219)       |
|                                 | 06/12/2023                | South Georgia shag       | <i>Leucocarbo georgianus</i>    | OP                             | -     | -     | -          | Negative   | N/P                                            | N/P                                                        | N/A                                           |
|                                 |                           |                          |                                 | C                              | -     | -     | -          | Negative   | N/P                                            | N/P                                                        | N/A                                           |
|                                 |                           | South Georgia shag       | <i>Leucocarbo georgianus</i>    | Brain                          | -     | -     | -          | Negative   | N/P                                            | N/P                                                        | N/A                                           |
|                                 |                           |                          |                                 | OP                             | -     | -     | -          | Negative   | N/P                                            | N/P                                                        | N/A                                           |
|                                 |                           | South Georgia shag       | <i>Leucocarbo georgianus</i>    | C                              | -     | -     | -          | Negative   | N/P                                            | N/P                                                        | N/A                                           |
|                                 |                           |                          |                                 | Brain                          | -     | -     | -          | Negative   | N/P                                            | N/P                                                        | N/A                                           |
|                                 |                           | King penguin             | <i>Aptenodytes patagonicus</i>  | OP                             | -     | -     | -          | Negative   | N/P                                            | N/P                                                        | N/A                                           |
|                                 |                           |                          |                                 | C                              | -     | -     | -          | Negative   | N/P                                            | N/P                                                        | N/A                                           |
|                                 |                           |                          |                                 | Brain                          | -     | -     | -          | Negative   | N/P                                            | N/P                                                        | N/A                                           |
|                                 |                           | Antarctic tern           | <i>Sterna vittata</i>           | OP                             | 25.88 | 20.58 | 24.38      | H5N1 HPAIV | Negative                                       | N/P                                                        | N/A                                           |
|                                 | Brain                     |                          |                                 | 19.81                          | 13.29 | 17.07 | H5N1 HPAIV | Negative   | A/ halacroc_tern/King_Edward_Point/141271/2023 | PQ113962-PQ113969<br>(EPI_ISL_18742220)                    |                                               |
|                                 | Stanley, Falkland Islands | 30/10/2023               | Southern fulmar                 | <i>Fulmarus glacialisoides</i> | OP    | 20.5  | 18.65      | 20.71      | H5N1 HPAIV                                     | Negative                                                   | A/Southern_fulmar/Falkland_Island/133789/2023 |
| C                               |                           |                          |                                 |                                | 18.85 | 17.57 | 19.62      | H5N1 HPAIV | Negative                                       | N/P                                                        | N/A                                           |
| Brain                           |                           |                          |                                 |                                | 21.51 | 20.49 | 22.41      | H5N1 HPAIV | Positive                                       | N/P                                                        | N/A                                           |
| 06/11/2023                      |                           | Grey-backed storm petrel | <i>Garrodia nereis</i>          | OP                             | 39.83 | -     | -          | Negative   | N/P                                            | N/P                                                        | N/A                                           |
|                                 |                           |                          |                                 | C                              | -     | -     | -          | Negative   | N/P                                            | N/P                                                        | N/A                                           |
|                                 |                           | Falkland steamer duck    | <i>Tachyeres brachypterus</i>   | OP                             | 39.37 | -     | -          | Negative   | N/P                                            | N/P                                                        | N/A                                           |
|                                 |                           |                          |                                 | C                              | -     | -     | -          | Negative   | N/P                                            | N/P                                                        | N/A                                           |
| 13/11/2023                      |                           | Southern fulmar          | <i>Fulmarus glacialisoides</i>  | OP                             | 28.81 | 25.58 | 26.85      | H5N1 HPAIV | Positive                                       | A/Southern_fulmar/Falkland_Island/138870/2023 <sup>a</sup> | PQ113938-PQ113945<br>(EPI_ISL_18918640)       |
|                                 |                           |                          |                                 | C                              | 32.89 | 29.45 | 30.98      | H5N1 HPAIV | Negative                                       | N/P                                                        | N/A                                           |
| 24/11/2023                      |                           |                          |                                 |                                | OP    | -     | -          | -          | Negative                                       | N/P                                                        | N/A                                           |

|                                 |                                   |                             |                                  |                                 |       |       |       |                   |                   |                  |     |
|---------------------------------|-----------------------------------|-----------------------------|----------------------------------|---------------------------------|-------|-------|-------|-------------------|-------------------|------------------|-----|
|                                 | 25/11/2023                        | Austral thrush              | <i>Turdus falcklandii</i>        | C                               | -     | -     | -     | Negative          | N/P               | N/P              | N/A |
|                                 |                                   | Rock shag                   | <i>halacrocorax magellanicus</i> | OP                              | -     | -     | -     | Negative          | N/P               | N/P              | N/A |
|                                 |                                   |                             |                                  | C                               | -     | -     | -     | Negative          | N/P               | N/P              | N/A |
|                                 | 27/11/2023                        | Chicken                     | <i>Gallus gallus domesticus</i>  | OP                              | -     | -     | -     | Negative          | N/P               | N/P              | N/A |
|                                 |                                   |                             |                                  | C                               | -     | -     | -     | Negative          | N/P               | N/P              | N/A |
|                                 | Saunders Island, Falkland Islands | 19/11/2023                  | Black browed albatross           | <i>Thalassarche melanophris</i> | OP    | 36.51 | 33.92 | 35.84             | <b>H5N1 HPAIV</b> | Negative         | N/P |
| C                               |                                   |                             |                                  |                                 | 31.61 | 29.46 | 30.81 | <b>H5N1 HPAIV</b> | Negative          | N/D <sup>h</sup> | N/A |
| Steeple Jason, Falkland Islands | 26/11/2023                        | Black browed albatross      | <i>Thalassarche melanophris</i>  | OP                              | -     | -     | -     | Negative          | N/P               | N/P              | N/A |
|                                 |                                   |                             |                                  | C                               | -     | -     | -     | Negative          | N/P               | N/P              | N/A |
|                                 |                                   | Black browed albatross      | <i>Thalassarche melanophris</i>  | OP                              | 34.75 | 34.6  | 32.87 | <b>H5N1 HPAIV</b> | Negative          | N/P              | N/A |
|                                 |                                   |                             |                                  | C                               | 30.47 | 30.94 | 29.16 | <b>H5N1 HPAIV</b> | Negative          | N/D              | N/A |
| New Island, Falkland Islands    | 01/12/2023                        | Imperial shag               | <i>Leucocarbo atriceps</i>       | OP                              | -     | -     | -     | Negative          | N/P               | N/P              | N/A |
|                                 |                                   |                             |                                  | C                               | -     | -     | -     | Negative          | N/P               | N/P              | N/A |
|                                 | 04/12/2023                        | Black browed albatross      | <i>Thalassarche melanophris</i>  | C                               | -     | -     | -     | Negative          | N/P               | N/P              | N/A |
|                                 |                                   |                             |                                  | OP                              | -     | -     | -     | Negative          | N/P               | N/P              | N/A |
| Kidney Island, Falkland Islands | 10/12/2023                        | Southern rockhopper penguin | <i>Eudyptes chrysocome</i>       | C                               | -     | -     | -     | Negative          | N/P               | N/P              | N/A |
|                                 |                                   |                             |                                  | OP                              | -     | -     | -     | Negative          | N/P               | N/P              | N/A |

**Supplementary Table 2: Summary of date, location and species of mammalian samples collected and testing result for H5 HPAIV from South Georgia.** A, RRT-PCR interpretation from M-gene, H5-HP and N1; b, virus isolation in embryonated fowl eggs; c, not performed (N/P); d, not applicable (N/A); f, performed but could not be determined (ND); -, No Cq

| Location                        | Collection date | Age              | Common name            | Scientific name              | Swab type | RRT-PCR assay |       |       | RRT-PCR Interpretation <sup>a</sup> | Virus isolation <sup>b</sup> | Virus strain name                                  | GISAID accession number                        |
|---------------------------------|-----------------|------------------|------------------------|------------------------------|-----------|---------------|-------|-------|-------------------------------------|------------------------------|----------------------------------------------------|------------------------------------------------|
|                                 |                 |                  |                        |                              |           | M-gene        | H5-HP | N1    |                                     |                              |                                                    |                                                |
| Moltke Harbour, South Georgia   | 31/10/2023      | Pup              | Southern elephant seal | <i>Mirounga leonina</i>      | Nasal     | 37.75         | -     | 39.5  | Negative                            | Negative                     | N/P <sup>c</sup>                                   | N/A <sup>d</sup>                               |
|                                 |                 |                  |                        |                              | Anal      | -             | -     | -     | Negative                            | N/P                          | N/P                                                | N/A                                            |
|                                 |                 |                  | Southern elephant seal | <i>Mirounga leonina</i>      | Nasal     | -             | -     | -     | Negative                            | N/P                          | N/P                                                | N/A                                            |
|                                 |                 |                  |                        |                              | Anal      | -             | -     | -     | Negative                            | N/P                          | N/P                                                | N/A                                            |
|                                 |                 |                  | Southern elephant seal | <i>Mirounga leonina</i>      | Nasal     | 38.8          | -     | -     | Negative                            | Negative                     | N/P                                                | N/A                                            |
|                                 |                 |                  |                        |                              | Anal      | -             | -     | -     | Negative                            | N/P                          | N/P                                                | N/A                                            |
| King Edward Cove, South Georgia | 06/12/2023      | Pup (newborn)    | Antarctic fur seal     | <i>Arctocephalus gazella</i> | Oral      | -             | -     | -     | Negative                            | N/P                          | N/P                                                | N/A                                            |
|                                 |                 |                  |                        |                              | Nasal     | -             | -     | -     | Negative                            | N/P                          | N/P                                                | N/A                                            |
|                                 |                 |                  |                        |                              | Anal      | -             | -     | -     | Negative                            | N/P                          | N/P                                                | N/A                                            |
|                                 |                 |                  |                        |                              | Brain     | -             | -     | -     | Negative                            | N/P                          | N/P                                                | N/A                                            |
| Jason Harbour, South Georgia    | 09/12/2023      | Weaner (molting) | Southern elephant seal | <i>Mirounga leonina</i>      | Oral      | 37.21         | 34.44 | 36.58 | <b>H5N1 HPAIV</b>                   | Negative                     | A/Southern_elephant_seal/Jason_Harbour/141027/2023 | <b>PQ113946-PQ113953</b><br>(EPI_ISL_18742221) |
|                                 |                 |                  |                        |                              | Anal      | -             | -     | -     | Negative                            | N/P                          | N/P                                                | N/A                                            |
|                                 |                 |                  |                        |                              | Nasal     | -             | -     | 39.93 | Negative                            | N/P                          | N/P                                                | N/A                                            |
|                                 |                 |                  |                        |                              | Brain     | -             | -     | -     | Negative                            | N/P                          | N/P                                                | N/A                                            |
|                                 |                 |                  | Southern elephant seal | <i>Mirounga leonina</i>      | Oral      | -             | -     | -     | Negative                            | N/P                          | N/P                                                | N/A                                            |
|                                 |                 |                  |                        |                              | Anal      | -             | -     | -     | Negative                            | N/P                          | N/P                                                | N/A                                            |
|                                 |                 |                  |                        |                              | Nasal     | -             | -     | -     | Negative                            | N/P                          | N/P                                                | N/A                                            |
|                                 |                 |                  | Southern elephant seal | <i>Mirounga leonina</i>      | Brain     | -             | -     | -     | Negative                            | N/P                          | N/P                                                | N/A                                            |
|                                 |                 |                  | Southern elephant seal | <i>Mirounga leonina</i>      | Oral      | -             | -     | -     | Negative                            | N/P                          | N/P                                                | N/A                                            |
|                                 |                 |                  |                        |                              | Anal      | -             | -     | -     | Negative                            | N/P                          | N/P                                                | N/A                                            |
|                                 |                 |                  |                        |                              | Nasal     | -             | -     | -     | Negative                            | N/P                          | N/P                                                | N/A                                            |



|                        |                         |       |       |       |       |                   |          |                                                    |                                                |
|------------------------|-------------------------|-------|-------|-------|-------|-------------------|----------|----------------------------------------------------|------------------------------------------------|
|                        |                         | Brain | -     | -     | -     | Negative          | N/P      | N/P                                                | N/A                                            |
| Southern elephant seal | <i>Mirounga leonina</i> | Oral  | -     | -     | -     | Negative          | N/P      | N/P                                                | N/A                                            |
|                        |                         | Anal  | -     | -     | -     | Negative          | N/P      | N/P                                                | N/A                                            |
|                        |                         | Nasal | -     | -     | 37.97 | Negative          | N/P      | N/P                                                | N/A                                            |
|                        |                         | Brain | -     | -     | -     | Negative          | N/P      | N/P                                                | N/A                                            |
| Southern elephant seal | <i>Mirounga leonina</i> | Oral  | -     | -     | -     | Negative          | N/P      | N/P                                                | N/A                                            |
|                        |                         | Anal  | 32.32 | 30.47 | 32.09 | <b>H5N1 HPAIV</b> | Negative | N/D <sup>f</sup>                                   | N/A                                            |
|                        |                         | Nasal | 38.27 | -     | 39.31 | Negative          | N/P      | N/P                                                | N/A                                            |
|                        |                         | Brain | -     | -     | -     | Negative          | N/P      | N/P                                                | N/A                                            |
| Southern elephant seal | <i>Mirounga leonina</i> | Oral  | 37.84 | -     | 38.38 | Negative          | N/P      | N/P                                                | N/A                                            |
|                        |                         | Anal  | 35.51 | 34.25 | 34.21 | <b>H5N1 HPAIV</b> | Negative | N/D                                                | N/A                                            |
|                        |                         | Nasal | -     | -     | 37.88 | Negative          | N/P      | N/P                                                | N/A                                            |
|                        |                         | Brain | 33.35 | 32.84 | 33.2  | <b>H5N1 HPAIV</b> | Negative | N/D                                                | N/A                                            |
| Southern elephant seal | <i>Mirounga leonina</i> | Oral  | -     | -     | -     | Negative          | N/P      | N/P                                                | N/A                                            |
|                        |                         | Anal  | -     | -     | -     | Negative          | N/P      | N/P                                                | N/A                                            |
|                        |                         | Nasal | -     | -     | -     | Negative          | N/P      | N/P                                                | N/A                                            |
|                        |                         | Brain | -     | -     | -     | Negative          | N/P      | N/P                                                | N/A                                            |
| Southern elephant seal | <i>Mirounga leonina</i> | Oral  | -     | -     | 39.86 | Negative          | N/P      | N/P                                                | N/A                                            |
|                        |                         | Anal  | -     | -     | -     | Negative          | N/P      | N/P                                                | N/A                                            |
|                        |                         | Nasal | -     | -     | -     | Negative          | N/P      | N/P                                                | N/A                                            |
|                        |                         | Brain | 32.78 | 31.02 | 32.63 | <b>H5N1 HPAIV</b> | Negative | N/D                                                | N/A                                            |
| Southern elephant seal | <i>Mirounga leonina</i> | Oral  | -     | -     | 39.64 | Negative          | N/P      | N/P                                                | N/A                                            |
|                        |                         | Anal  | 37.98 | -     | 36.14 | Negative          | N/P      | N/P                                                | N/A                                            |
|                        |                         | Nasal | 36.05 | 35.1  | 36.23 | <b>H5N1 HPAIV</b> | Negative | N/D                                                | N/A                                            |
|                        |                         | Brain | 37.04 | -     | 39.35 | Negative          | N/P      | N/P                                                | N/A                                            |
|                        |                         | Liver | -     | -     | -     | Negative          | N/P      | N/P                                                | N/A                                            |
|                        |                         | Lung  | 32.03 | 31.41 | 32.24 | <b>H5N1 HPAIV</b> | Negative | A/Southern_elephant_seal/Jason_Harbour/141078/2023 | <b>PQ114042-PQ114049</b><br>(EPI_ISL_18742213) |
|                        |                         | Blood | -     | -     | -     | Negative          | N/P      | N/P                                                | N/A                                            |

|  |  |            |                    |                              |       |       |       |       |                   |          |                                                |                                         |
|--|--|------------|--------------------|------------------------------|-------|-------|-------|-------|-------------------|----------|------------------------------------------------|-----------------------------------------|
|  |  | Adult male | Antarctic fur seal | <i>Arctocephalus gazella</i> | Oral  | -     | -     | -     | Negative          | N/P      | N/P                                            | N/A                                     |
|  |  |            |                    |                              | Anal  | -     | -     | -     | Negative          | N/P      | N/P                                            | N/A                                     |
|  |  |            |                    |                              | Nasal | 36.9  | -     | -     | Negative          | N/P      | N/P                                            | N/A                                     |
|  |  |            |                    |                              | Brain | -     | -     | -     | Negative          | N/P      | N/P                                            | N/A                                     |
|  |  |            | Antarctic fur seal | <i>Arctocephalus gazella</i> | Oral  | 30.66 | 29.87 | 31.18 | <b>H5N1 HPAIV</b> | Negative | A/Antarctic_fur_seal/Jason_Harbour/141037/2023 | PQ114050-PQ114057<br>(EPI_ISL_18742212) |
|  |  |            |                    |                              | Anal  | -     | -     | -     | Negative          | N/P      | N/P                                            | N/A                                     |
|  |  |            |                    |                              | Nasal | 32.41 | 33.81 | 35.49 | <b>H5N1 HPAIV</b> | Negative | N/P                                            | N/A                                     |
|  |  |            |                    |                              | Brain | 31.61 | 33.71 | 32.59 | <b>H5N1 HPAIV</b> | Negative | N/P                                            | N/A                                     |
|  |  |            | Antarctic fur seal | <i>Arctocephalus gazella</i> | Oral  | -     | -     | -     | Negative          | N/P      | N/P                                            | N/A                                     |
|  |  |            |                    |                              | Anal  | -     | -     | -     | Negative          | N/P      | N/P                                            | N/A                                     |
|  |  |            |                    |                              | Nasal | -     | -     | -     | Negative          | N/P      | N/P                                            | N/A                                     |
|  |  |            |                    |                              | Brain | -     | -     | -     | Negative          | N/P      | N/P                                            | N/A                                     |

**Supplementary Table 3: Percentage nucleotide (nt) identity across H5N1 HPAIV sequences generated from South Georgia and The Falkland Islands.**

|                                                    | A/Kelp Gull/Hound Bay/133744/2023                  | A/Kelp Gull/Hound Bay/133747/2023 | A/Brown Skua/Moltke Harbour/133752/2023 | A/Kelp Gull/Moltke Harbour/133754/2023 | A/Brown Skua/Moltke Harbour/133755/2023 | A/Kelp Gull/Harpon Bay/133943/2023 | A/Brown Skua/Hound Bay/133947/2023 | A/Brown Skua/Hound Bay/133949/2023 | A/Brown skua/Bird Island/128289/2023 | A/Brown skua/Bird Island/128288/2023 | A/Brown skua/Bird Island/128287/2023 | A/Kelp Gull/Penguin River/141239/2023 | A/Brown Skua/Penguin River/141236/2023 | A/Kelp Gull/Penguin River/141234/2023 | A/Brown Skua/Bird Island/141232/2023 | A/Southern Elephant Seal/Jason Harbour/141078/2023 | A/Antarctic Fur Seal/Jason Harbour/141037/2023 | A/Southern Elephant Seal/Jason Harbour/141027/2023 | A/Southern Fulmar/Falkland Islands/138870/2023 | A/Southern fulmar/Falkland Islands/133789/2023 |       |
|----------------------------------------------------|----------------------------------------------------|-----------------------------------|-----------------------------------------|----------------------------------------|-----------------------------------------|------------------------------------|------------------------------------|------------------------------------|--------------------------------------|--------------------------------------|--------------------------------------|---------------------------------------|----------------------------------------|---------------------------------------|--------------------------------------|----------------------------------------------------|------------------------------------------------|----------------------------------------------------|------------------------------------------------|------------------------------------------------|-------|
| PB2                                                | A/Kelp Gull/Hound Bay/133744/2023                  | 100                               | 99.86                                   | 99.82                                  | 99.82                                   | 99.87                              | 99.96                              | 99.91                              | 99.78                                | 99.96                                | 99.91                                | 99.96                                 | 99.78                                  | 99.78                                 | 99.82                                | 99.78                                              | 99.96                                          | 99.78                                              | 99.82                                          | 99.52                                          | 99.43 |
|                                                    | A/Kelp Gull/Hound Bay/133747/2023                  | 99.86                             | 100                                     | 99.77                                  | 99.77                                   | 99.73                              | 99.82                              | 99.95                              | 99.73                                | 99.91                                | 99.86                                | 99.91                                 | 99.73                                  | 99.73                                 | 99.77                                | 99.73                                              | 99.82                                          | 99.73                                              | 99.68                                          | 99.46                                          | 99.41 |
|                                                    | A/Brown Skua/Moltke Harbour/133752/2023            | 99.82                             | 99.77                                   | 100                                    | 99.82                                   | 99.69                              | 99.78                              | 99.82                              | 99.96                                | 99.87                                | 99.82                                | 99.87                                 | 99.69                                  | 99.69                                 | 99.74                                | 99.69                                              | 99.78                                          | 99.69                                              | 99.65                                          | 99.43                                          | 99.34 |
|                                                    | A/Kelp Gull/Moltke Harbour/133754/2023             | 99.82                             | 99.77                                   | 99.82                                  | 100                                     | 99.69                              | 99.78                              | 99.82                              | 99.78                                | 99.87                                | 99.82                                | 99.87                                 | 99.69                                  | 99.69                                 | 99.74                                | 99.69                                              | 99.78                                          | 99.69                                              | 99.65                                          | 99.43                                          | 99.34 |
|                                                    | A/Brown Skua/Moltke Harbour/133755/2023            | 99.87                             | 99.73                                   | 99.69                                  | 99.69                                   | 100                                | 99.82                              | 99.78                              | 99.65                                | 99.82                                | 99.78                                | 99.82                                 | 99.65                                  | 99.65                                 | 99.69                                | 99.65                                              | 99.82                                          | 99.65                                              | 99.69                                          | 99.39                                          | 99.3  |
|                                                    | A/Kelp Gull/Harpon Bay/133943/2023                 | 99.96                             | 99.82                                   | 99.78                                  | 99.78                                   | 99.82                              | 100                                | 99.87                              | 99.74                                | 99.91                                | 99.87                                | 99.91                                 | 99.74                                  | 99.78                                 | 99.74                                | 99.74                                              | 99.91                                          | 99.74                                              | 99.78                                          | 99.56                                          | 99.47 |
|                                                    | A/Brown Skua/Hound Bay/133947/2023                 | 99.91                             | 99.95                                   | 99.82                                  | 99.82                                   | 99.78                              | 99.87                              | 100                                | 99.78                                | 99.96                                | 99.91                                | 99.96                                 | 99.78                                  | 99.78                                 | 99.82                                | 99.78                                              | 99.87                                          | 99.78                                              | 99.74                                          | 99.52                                          | 99.43 |
|                                                    | A/Brown Skua/Hound Bay/133949/2023                 | 99.78                             | 99.73                                   | 99.96                                  | 99.78                                   | 99.65                              | 99.74                              | 99.78                              | 100                                  | 99.82                                | 99.78                                | 99.82                                 | 99.65                                  | 99.65                                 | 99.69                                | 99.65                                              | 99.74                                          | 99.65                                              | 99.61                                          | 99.39                                          | 99.3  |
|                                                    | A/Brown skua/Bird Island/128289/2023               | 99.96                             | 99.91                                   | 99.87                                  | 99.87                                   | 99.82                              | 99.91                              | 99.96                              | 99.82                                | 100                                  | 99.96                                | 100                                   | 99.82                                  | 99.82                                 | 99.82                                | 99.82                                              | 99.87                                          | 99.82                                              | 99.78                                          | 99.56                                          | 99.47 |
|                                                    | A/Brown skua/Bird Island/128288/2023               | 99.91                             | 99.86                                   | 99.82                                  | 99.82                                   | 99.78                              | 99.87                              | 99.91                              | 99.78                                | 99.96                                | 100                                  | 99.96                                 | 99.78                                  | 99.78                                 | 99.82                                | 99.78                                              | 99.87                                          | 99.78                                              | 99.74                                          | 99.52                                          | 99.43 |
|                                                    | A/Brown skua/Bird Island/128287/2023               | 99.96                             | 99.91                                   | 99.87                                  | 99.87                                   | 99.82                              | 99.91                              | 99.96                              | 99.82                                | 100                                  | 99.96                                | 100                                   | 99.82                                  | 99.82                                 | 99.82                                | 99.82                                              | 99.91                                          | 99.82                                              | 99.78                                          | 99.56                                          | 99.47 |
|                                                    | A/Kelp Gull/Penguin River/141239/2023              | 99.78                             | 99.73                                   | 99.69                                  | 99.69                                   | 99.65                              | 99.74                              | 99.78                              | 99.65                                | 99.82                                | 99.78                                | 99.82                                 | 100                                    | 100                                   | 99.96                                | 100                                                | 99.74                                          | 100                                                | 99.96                                          | 99.39                                          | 99.3  |
|                                                    | A/Brown Skua/Penguin River/141236/2023             | 99.78                             | 99.73                                   | 99.69                                  | 99.69                                   | 99.65                              | 99.74                              | 99.78                              | 99.65                                | 99.82                                | 99.78                                | 99.82                                 | 100                                    | 100                                   | 99.96                                | 100                                                | 99.74                                          | 100                                                | 99.96                                          | 99.39                                          | 99.3  |
|                                                    | A/Kelp Gull/Penguin River/141234/2023              | 99.82                             | 99.77                                   | 99.74                                  | 99.74                                   | 99.69                              | 99.78                              | 99.82                              | 99.69                                | 99.87                                | 99.82                                | 99.87                                 | 99.96                                  | 99.96                                 | 100                                  | 99.96                                              | 99.78                                          | 99.96                                              | 99.91                                          | 99.43                                          | 99.34 |
|                                                    | A/Brown Skua/Bird Island/141232/2023               | 99.78                             | 99.73                                   | 99.69                                  | 99.69                                   | 99.65                              | 99.74                              | 99.78                              | 99.65                                | 99.82                                | 99.78                                | 99.82                                 | 100                                    | 100                                   | 99.96                                | 100                                                | 99.74                                          | 100                                                | 99.96                                          | 99.39                                          | 99.3  |
|                                                    | A/Southern Elephant Seal/Jason Harbour/141078/2023 | 99.96                             | 99.82                                   | 99.78                                  | 99.78                                   | 99.82                              | 99.91                              | 99.87                              | 99.74                                | 99.91                                | 99.87                                | 99.91                                 | 99.74                                  | 99.74                                 | 99.78                                | 99.74                                              | 100                                            | 99.74                                              | 99.78                                          | 99.47                                          | 99.39 |
| A/Antarctic Fur Seal/Jason Harbour/141037/2023     | 99.78                                              | 99.73                             | 99.69                                   | 99.69                                  | 99.65                                   | 99.74                              | 99.78                              | 99.65                              | 99.82                                | 99.78                                | 99.82                                | 100                                   | 100                                    | 99.96                                 | 100                                  | 99.74                                              | 100                                            | 99.96                                              | 99.39                                          | 99.3                                           |       |
| A/Southern Elephant Seal/Jason Harbour/141027/2023 | 99.82                                              | 99.68                             | 99.65                                   | 99.65                                  | 99.69                                   | 99.78                              | 99.74                              | 99.61                              | 99.78                                | 99.74                                | 99.78                                | 99.96                                 | 99.96                                  | 99.91                                 | 99.96                                | 99.78                                              | 99.96                                          | 100                                                | 99.34                                          | 99.25                                          |       |
| A/Southern Fulmar/Falkland Islands/138870/2023     | 99.52                                              | 99.46                             | 99.43                                   | 99.43                                  | 99.39                                   | 99.56                              | 99.52                              | 99.39                              | 99.56                                | 99.52                                | 99.56                                | 99.39                                 | 99.39                                  | 99.43                                 | 99.39                                | 99.47                                              | 99.39                                          | 99.34                                              | 100                                            | 99.91                                          |       |
| A/Southern fulmar/Falkland Islands/133789/2023     | 99.43                                              | 99.41                             | 99.34                                   | 99.34                                  | 99.3                                    | 99.47                              | 99.43                              | 99.3                               | 99.47                                | 99.43                                | 99.47                                | 99.3                                  | 99.3                                   | 99.34                                 | 99.3                                 | 99.39                                              | 99.3                                           | 99.25                                              | 99.91                                          | 100                                            |       |
| PB1                                                | A/Kelp Gull/Hound Bay/133744/2023                  | 100                               | 99.82                                   | 99.91                                  | 99.82                                   | 99.82                              | 99.91                              | 99.91                              | 99.91                                | 99.78                                | 99.87                                | 99.87                                 | 99.78                                  | 99.78                                 | 99.87                                | 99.78                                              | 99.91                                          | 99.78                                              | 99.91                                          | 99.34                                          | 99.43 |
|                                                    | A/Kelp Gull/Hound Bay/133747/2023                  | 99.82                             | 100                                     | 99.86                                  | 99.77                                   | 99.72                              | 99.82                              | 99.91                              | 99.82                                | 99.68                                | 99.77                                | 99.77                                 | 99.68                                  | 99.68                                 | 99.77                                | 99.68                                              | 99.82                                          | 99.68                                              | 99.82                                          | 99.36                                          | 99.45 |
|                                                    | A/Brown Skua/Moltke Harbour/133752/2023            | 99.91                             | 99.86                                   | 100                                    | 99.91                                   | 99.82                              | 99.91                              | 99.91                              | 100                                  | 99.86                                | 99.95                                | 99.95                                 | 99.86                                  | 99.86                                 | 99.95                                | 99.86                                              | 99.91                                          | 99.86                                              | 99.91                                          | 99.37                                          | 99.46 |
|                                                    | A/Kelp Gull/Moltke Harbour/133754/2023             | 99.82                             | 99.77                                   | 99.91                                  | 100                                     | 99.73                              | 99.82                              | 99.82                              | 99.91                                | 99.77                                | 99.86                                | 99.86                                 | 99.77                                  | 99.77                                 | 99.86                                | 99.77                                              | 99.82                                          | 99.77                                              | 99.82                                          | 99.28                                          | 99.37 |
|                                                    | A/Brown Skua/Moltke Harbour/133755/2023            | 99.82                             | 99.72                                   | 99.82                                  | 99.73                                   | 100                                | 99.82                              | 99.82                              | 99.82                                | 99.69                                | 99.78                                | 99.78                                 | 99.69                                  | 99.69                                 | 99.78                                | 99.69                                              | 99.82                                          | 99.69                                              | 99.82                                          | 99.29                                          | 99.38 |
|                                                    | A/Kelp Gull/Harpon Bay/133943/2023                 | 99.91                             | 99.82                                   | 99.91                                  | 99.82                                   | 99.82                              | 100                                | 99.91                              | 99.91                                | 99.78                                | 99.87                                | 99.87                                 | 99.78                                  | 99.78                                 | 99.87                                | 99.78                                              | 99.91                                          | 99.78                                              | 99.91                                          | 99.34                                          | 99.43 |
|                                                    | A/Brown Skua/Hound Bay/133947/2023                 | 99.91                             | 99.91                                   | 99.91                                  | 99.82                                   | 99.82                              | 99.91                              | 100                                | 99.91                                | 99.78                                | 99.87                                | 99.87                                 | 99.78                                  | 99.78                                 | 99.87                                | 99.78                                              | 99.91                                          | 99.78                                              | 99.91                                          | 99.34                                          | 99.43 |
|                                                    | A/Brown Skua/Hound Bay/133949/2023                 | 99.91                             | 99.82                                   | 100                                    | 99.91                                   | 99.82                              | 99.91                              | 99.91                              | 100                                  | 99.87                                | 99.96                                | 99.96                                 | 99.87                                  | 99.87                                 | 99.96                                | 99.87                                              | 99.91                                          | 99.87                                              | 99.91                                          | 99.34                                          | 99.43 |
|                                                    | A/Brown skua/Bird Island/128289/2023               | 99.78                             | 99.68                                   | 99.86                                  | 99.77                                   | 99.69                              | 99.78                              | 99.78                              | 99.87                                | 100                                  | 99.91                                | 99.91                                 | 99.74                                  | 99.74                                 | 99.82                                | 99.74                                              | 99.78                                          | 99.74                                              | 99.78                                          | 99.21                                          | 99.3  |
|                                                    | A/Brown skua/Bird Island/128288/2023               | 99.87                             | 99.77                                   | 99.95                                  | 99.86                                   | 99.78                              | 99.87                              | 99.87                              | 99.96                                | 99.91                                | 100                                  | 100                                   | 99.82                                  | 99.82                                 | 99.91                                | 99.82                                              | 99.87                                          | 99.82                                              | 99.87                                          | 99.3                                           | 99.38 |
|                                                    | A/Brown skua/Bird Island/128287/2023               | 99.87                             | 99.77                                   | 99.95                                  | 99.86                                   | 99.78                              | 99.87                              | 99.87                              | 99.96                                | 99.91                                | 100                                  | 100                                   | 99.82                                  | 99.82                                 | 99.91                                | 99.82                                              | 99.87                                          | 99.82                                              | 99.87                                          | 99.3                                           | 99.38 |
|                                                    | A/Kelp Gull/Penguin River/141239/2023              | 99.78                             | 99.68                                   | 99.86                                  | 99.77                                   | 99.69                              | 99.78                              | 99.78                              | 99.87                                | 99.74                                | 99.82                                | 99.82                                 | 100                                    | 100                                   | 99.91                                | 100                                                | 99.78                                          | 100                                                | 99.87                                          | 99.21                                          | 99.3  |

|                                                    |                                                    |       |       |       |       |       |       |       |       |       |       |       |       |       |       |       |       |       |       |       |       |
|----------------------------------------------------|----------------------------------------------------|-------|-------|-------|-------|-------|-------|-------|-------|-------|-------|-------|-------|-------|-------|-------|-------|-------|-------|-------|-------|
|                                                    | A/Brown Skua/Penguin River/141236/2023             | 99.78 | 99.68 | 99.86 | 99.77 | 99.69 | 99.78 | 99.78 | 99.87 | 99.74 | 99.82 | 99.82 | 100   | 100   | 99.91 | 100   | 99.78 | 100   | 99.87 | 99.21 | 99.3  |
|                                                    | A/Kelp Gull/Penguin River/141234/2023              | 99.87 | 99.77 | 99.95 | 99.86 | 99.78 | 99.87 | 99.87 | 99.96 | 99.82 | 99.91 | 99.91 | 99.91 | 99.91 | 100   | 99.91 | 99.87 | 99.91 | 99.87 | 99.3  | 99.38 |
|                                                    | A/Brown Skua/Bird Island/141232/2023               | 99.78 | 99.68 | 99.86 | 99.77 | 99.69 | 99.78 | 99.78 | 99.87 | 99.74 | 99.82 | 99.82 | 100   | 100   | 99.91 | 100   | 99.78 | 100   | 99.87 | 99.21 | 99.3  |
|                                                    | A/Southern Elephant Seal/Jason Harbour/141078/2023 | 99.91 | 99.82 | 99.91 | 99.82 | 99.82 | 99.91 | 99.91 | 99.91 | 99.78 | 99.87 | 99.87 | 99.78 | 99.78 | 99.87 | 99.78 | 100   | 99.78 | 99.91 | 99.34 | 99.43 |
|                                                    | A/Antarctic Fur Seal/Jason Harbour/141037/2023     | 99.78 | 99.68 | 99.86 | 99.77 | 99.69 | 99.78 | 99.78 | 99.87 | 99.74 | 99.82 | 99.82 | 100   | 100   | 99.91 | 100   | 99.78 | 100   | 99.87 | 99.21 | 99.3  |
|                                                    | A/Southern Elephant Seal/Jason Harbour/141027/2023 | 99.91 | 99.82 | 99.91 | 99.82 | 99.82 | 99.91 | 99.91 | 99.91 | 99.78 | 99.87 | 99.87 | 99.87 | 99.87 | 99.87 | 99.87 | 99.91 | 99.87 | 100   | 99.34 | 99.43 |
|                                                    | A/Southern Fulmar/Falkland Islands/138870/2023     | 99.34 | 99.36 | 99.37 | 99.28 | 99.29 | 99.34 | 99.34 | 99.34 | 99.21 | 99.3  | 99.3  | 99.21 | 99.21 | 99.3  | 99.21 | 99.34 | 99.21 | 99.34 | 100   | 99.82 |
|                                                    | A/Southern fulmar/Falkland Islands/133789/2023     | 99.43 | 99.45 | 99.46 | 99.37 | 99.38 | 99.43 | 99.43 | 99.43 | 99.3  | 99.38 | 99.38 | 99.3  | 99.3  | 99.38 | 99.3  | 99.43 | 99.3  | 99.43 | 99.82 | 100   |
| PA                                                 | A/Kelp Gull/Hound Bay/133744/2023                  | 100   | 99.77 | 99.72 | 99.72 | 99.77 | 100   | 99.77 | 99.77 | 99.86 | 99.86 | 99.86 | 99.81 | 99.81 | 99.81 | 99.81 | 99.81 | 99.81 | 99.67 | 98.98 | 98.84 |
|                                                    | A/Kelp Gull/Hound Bay/133747/2023                  | 99.77 | 100   | 99.77 | 99.77 | 99.63 | 99.77 | 99.81 | 99.81 | 99.91 | 99.91 | 99.91 | 99.86 | 99.86 | 99.86 | 99.86 | 99.77 | 99.86 | 99.72 | 99.02 | 98.88 |
|                                                    | A/Brown Skua/Moltke Harbour/133752/2023            | 99.72 | 99.77 | 100   | 99.72 | 99.58 | 99.72 | 99.77 | 99.86 | 99.86 | 99.86 | 99.86 | 99.81 | 99.81 | 99.81 | 99.81 | 99.72 | 99.81 | 99.67 | 98.98 | 98.84 |
|                                                    | A/Kelp Gull/Moltke Harbour/133754/2023             | 99.72 | 99.77 | 99.72 | 100   | 99.63 | 99.72 | 99.77 | 99.77 | 99.86 | 99.86 | 99.86 | 99.81 | 99.81 | 99.81 | 99.81 | 99.72 | 99.81 | 99.67 | 98.97 | 98.83 |
|                                                    | A/Brown Skua/Moltke Harbour/133755/2023            | 99.77 | 99.63 | 99.58 | 99.63 | 100   | 99.77 | 99.63 | 99.63 | 99.72 | 99.72 | 99.72 | 99.67 | 99.67 | 99.67 | 99.67 | 99.67 | 99.67 | 99.53 | 98.84 | 98.7  |
|                                                    | A/Kelp Gull/Harpon Bay/133943/2023                 | 100   | 99.77 | 99.72 | 99.72 | 99.77 | 100   | 99.77 | 99.77 | 99.86 | 99.86 | 99.86 | 99.81 | 99.81 | 99.81 | 99.81 | 99.81 | 99.81 | 99.67 | 98.98 | 98.84 |
|                                                    | A/Brown Skua/Hound Bay/133947/2023                 | 99.77 | 99.81 | 99.77 | 99.77 | 99.63 | 99.77 | 100   | 99.81 | 99.91 | 99.91 | 99.91 | 99.86 | 99.86 | 99.86 | 99.86 | 99.77 | 99.86 | 99.72 | 99.02 | 98.88 |
|                                                    | A/Brown Skua/Hound Bay/133949/2023                 | 99.77 | 99.81 | 99.86 | 99.77 | 99.63 | 99.77 | 99.81 | 100   | 99.91 | 99.91 | 99.91 | 99.86 | 99.86 | 99.86 | 99.86 | 99.77 | 99.86 | 99.72 | 99.02 | 98.88 |
|                                                    | A/Brown skua/Bird Island/128289/2023               | 99.86 | 99.91 | 99.86 | 99.86 | 99.72 | 99.86 | 99.91 | 99.91 | 100   | 100   | 100   | 99.95 | 99.95 | 99.95 | 99.95 | 99.86 | 99.95 | 99.81 | 99.12 | 98.98 |
|                                                    | A/Brown skua/Bird Island/128288/2023               | 99.86 | 99.91 | 99.86 | 99.86 | 99.72 | 99.86 | 99.91 | 99.91 | 100   | 100   | 100   | 99.95 | 99.95 | 99.95 | 99.95 | 99.86 | 99.95 | 99.81 | 99.12 | 98.98 |
|                                                    | A/Brown skua/Bird Island/128287/2023               | 99.86 | 99.91 | 99.86 | 99.86 | 99.72 | 99.86 | 99.91 | 99.91 | 100   | 100   | 100   | 99.95 | 99.95 | 99.95 | 99.95 | 99.86 | 99.95 | 99.81 | 99.12 | 98.98 |
|                                                    | A/Kelp Gull/Penguin River/141239/2023              | 99.81 | 99.86 | 99.81 | 99.81 | 99.67 | 99.81 | 99.86 | 99.86 | 99.95 | 99.95 | 99.95 | 100   | 100   | 100   | 100   | 99.81 | 100   | 99.77 | 99.07 | 98.93 |
|                                                    | A/Brown Skua/Penguin River/141236/2023             | 99.81 | 99.86 | 99.81 | 99.81 | 99.67 | 99.81 | 99.86 | 99.86 | 99.95 | 99.95 | 99.95 | 100   | 100   | 100   | 100   | 99.81 | 100   | 99.77 | 99.07 | 98.93 |
|                                                    | A/Kelp Gull/Penguin River/141234/2023              | 99.81 | 99.86 | 99.81 | 99.81 | 99.67 | 99.81 | 99.86 | 99.86 | 99.95 | 99.95 | 99.95 | 100   | 100   | 100   | 100   | 99.81 | 100   | 99.77 | 99.07 | 98.93 |
|                                                    | A/Brown Skua/Bird Island/141232/2023               | 99.81 | 99.86 | 99.81 | 99.81 | 99.67 | 99.81 | 99.86 | 99.86 | 99.95 | 99.95 | 99.95 | 100   | 100   | 100   | 100   | 99.81 | 100   | 99.77 | 99.07 | 98.93 |
|                                                    | A/Southern Elephant Seal/Jason Harbour/141078/2023 | 99.81 | 99.77 | 99.72 | 99.72 | 99.67 | 99.81 | 99.77 | 99.77 | 99.86 | 99.86 | 99.86 | 99.81 | 99.81 | 99.81 | 99.81 | 100   | 99.81 | 99.77 | 98.98 | 98.84 |
| A/Antarctic Fur Seal/Jason Harbour/141037/2023     | 99.81                                              | 99.86 | 99.81 | 99.81 | 99.67 | 99.81 | 99.86 | 99.86 | 99.95 | 99.95 | 99.95 | 100   | 100   | 100   | 100   | 99.81 | 100   | 99.77 | 99.07 | 98.93 |       |
| A/Southern Elephant Seal/Jason Harbour/141027/2023 | 99.67                                              | 99.72 | 99.67 | 99.67 | 99.53 | 99.67 | 99.72 | 99.72 | 99.81 | 99.81 | 99.81 | 99.77 | 99.77 | 99.77 | 99.77 | 99.77 | 99.77 | 100   | 98.93 | 98.79 |       |
| A/Southern Fulmar/Falkland Islands/138870/2023     | 98.98                                              | 99.02 | 98.98 | 98.97 | 98.84 | 98.98 | 99.02 | 99.02 | 99.12 | 99.12 | 99.12 | 99.07 | 99.07 | 99.07 | 99.07 | 98.98 | 99.07 | 98.93 | 100   | 99.77 |       |
| A/Southern fulmar/Falkland Islands/133789/2023     | 98.84                                              | 98.88 | 98.84 | 98.83 | 98.7  | 98.84 | 98.88 | 98.88 | 98.98 | 98.98 | 98.98 | 98.93 | 98.93 | 98.93 | 98.93 | 98.84 | 98.93 | 98.79 | 99.77 | 100   |       |
| HA                                                 | A/Kelp Gull/Hound Bay/133744/2023                  | 100   | 99.77 | 99.88 | 99.77 | 99.94 | 99.94 | 99.88 | 99.88 | 99.88 | 99.77 | 99.82 | 99.71 | 99.53 | 99.77 | 99.47 | 99.82 | 99.71 | 99.47 | 99    | 99.06 |
|                                                    | A/Kelp Gull/Hound Bay/133747/2023                  | 99.77 | 100   | 99.88 | 99.77 | 99.82 | 99.82 | 99.88 | 99.88 | 99.88 | 99.77 | 99.82 | 99.71 | 99.53 | 99.77 | 99.47 | 99.59 | 99.47 | 99.71 | 99    | 99.06 |
|                                                    | A/Brown Skua/Moltke Harbour/133752/2023            | 99.88 | 99.88 | 100   | 99.88 | 99.94 | 99.94 | 100   | 100   | 100   | 99.88 | 99.94 | 99.88 | 99.71 | 99.88 | 99.65 | 99.71 | 99.65 | 99.88 | 99.12 | 99.18 |
|                                                    | A/Kelp Gull/Moltke Harbour/133754/2023             | 99.77 | 99.77 | 99.88 | 100   | 99.82 | 99.82 | 99.88 | 99.88 | 99.88 | 99.77 | 99.82 | 99.71 | 99.53 | 99.77 | 99.47 | 99.59 | 99.47 | 99.71 | 99    | 99.06 |
|                                                    | A/Brown Skua/Moltke Harbour/133755/2023            | 99.94 | 99.82 | 99.94 | 99.82 | 100   | 100   | 99.94 | 99.94 | 99.94 | 99.82 | 99.88 | 99.77 | 99.59 | 99.82 | 99.53 | 99.77 | 99.53 | 99.76 | 99.06 | 99.12 |
|                                                    | A/Kelp Gull/Harpon Bay/133943/2023                 | 99.94 | 99.82 | 99.94 | 99.82 | 100   | 100   | 99.94 | 99.94 | 99.94 | 99.82 | 99.88 | 99.77 | 99.59 | 99.82 | 99.53 | 99.77 | 99.53 | 99.77 | 99.06 | 99.12 |
|                                                    | A/Brown Skua/Hound Bay/133947/2023                 | 99.88 | 99.88 | 100   | 99.88 | 99.94 | 99.94 | 100   | 100   | 100   | 99.88 | 99.94 | 99.82 | 99.65 | 99.88 | 99.59 | 99.71 | 99.59 | 99.82 | 99.12 | 99.18 |
|                                                    | A/Brown Skua/Hound Bay/133949/2023                 | 99.88 | 99.88 | 100   | 99.88 | 99.94 | 99.94 | 100   | 100   | 100   | 99.88 | 99.94 | 99.82 | 99.65 | 99.88 | 99.59 | 99.71 | 99.59 | 99.82 | 99.12 | 99.18 |
|                                                    | A/Brown skua/Bird Island/128289/2023               | 99.77 | 99.77 | 99.88 | 99.77 | 99.82 | 99.82 | 99.88 | 99.88 | 99.88 | 100   | 99.94 | 99.82 | 99.65 | 99.88 | 99.59 | 99.71 | 99.59 | 99.88 | 99    | 99.18 |
|                                                    | A/Brown skua/Bird Island/128288/2023               | 99.82 | 99.82 | 99.94 | 99.82 | 99.88 | 99.88 | 99.94 | 99.94 | 99.94 | 99.94 | 100   | 99.88 | 99.71 | 99.94 | 99.65 | 99.77 | 99.65 | 99.88 | 99.06 | 99.24 |
|                                                    | A/Brown skua/Bird Island/128287/2023               | 99.71 | 99.71 | 99.88 | 99.71 | 99.77 | 99.77 | 99.82 | 99.82 | 99.82 | 99.82 | 99.88 | 100   | 99.82 | 99.82 | 99.65 | 99.65 | 99.65 | 99.88 | 98.94 | 99.12 |
|                                                    | A/Kelp Gull/Penguin River/141239/2023              | 99.53 | 99.53 | 99.71 | 99.53 | 99.59 | 99.59 | 99.65 | 99.65 | 99.65 | 99.65 | 99.71 | 99.82 | 100   | 99.65 | 99.65 | 99.65 | 99.65 | 99.82 | 98.77 | 98.94 |
|                                                    | A/Brown Skua/Penguin River/141236/2023             | 99.77 | 99.77 | 99.88 | 99.77 | 99.82 | 99.82 | 99.88 | 99.88 | 99.88 | 99.88 | 99.94 | 99.82 | 99.65 | 100   | 99.59 | 99.71 | 99.71 | 99.82 | 99.12 | 99.3  |
|                                                    | A/Kelp Gull/Penguin River/141234/2023              | 99.47 | 99.47 | 99.65 | 99.47 | 99.53 | 99.53 | 99.59 | 99.59 | 99.59 | 99.59 | 99.59 | 99.65 | 99.65 | 99.82 | 99.59 | 100   | 99.41 | 99.88 | 99.77 | 98.71 |
|                                                    | A/Southern Elephant Seal/Jason Harbour/141078/2023 | 99.71 | 99.59 | 99.71 | 99.59 | 99.77 | 99.77 | 99.71 | 99.71 | 99.71 | 99.71 | 99.71 | 99.77 | 99.65 | 99.47 | 99.71 | 99.41 | 100   | 99.41 | 99.65 | 98.83 |
|                                                    | A/Antarctic Fur Seal/Jason Harbour/141037/2023     | 99.47 | 99.47 | 99.65 | 99.47 | 99.53 | 99.53 | 99.59 | 99.59 | 99.59 | 99.59 | 99.59 | 99.65 | 99.65 | 99.82 | 99.71 | 99.88 | 99.41 | 100   | 99.77 | 98.83 |
|                                                    | A/Southern Elephant Seal/Jason Harbour/141027/2023 | 99.71 | 99.71 | 99.88 | 99.71 | 99.76 | 99.77 | 99.82 | 99.82 | 99.82 | 99.88 | 99.88 | 99.88 | 99.82 | 99.82 | 99.77 | 99.65 | 99.77 | 100   | 99.82 | 98.94 |
|                                                    | A/Southern Fulmar/Falkland Islands/138870/2023     | 99    | 99    | 99.12 | 99    | 99.06 | 99.06 | 99.12 | 99.12 | 99.12 | 99    | 99.06 | 98.94 | 98.77 | 99.12 | 98.71 | 98.83 | 98.83 | 98.94 | 100   | 99.59 |
| A/Southern fulmar/Falkland Islands/133789/2023     | 99.06                                              | 99.06 | 99.18 | 99.06 | 99.12 | 99.12 | 99.18 | 99.18 | 99.18 | 99.18 | 99.24 | 99.12 | 98.94 | 99.3  | 98.88 | 99    | 99    | 99.12 | 99.59 | 100   |       |
| NP                                                 | A/Kelp Gull/Hound Bay/133744/2023                  | 100   | 99.8  | 99.67 | 99.86 | 99.93 | 99.93 | 99.6  | 99.93 | 99.93 | 99.93 | 99.93 | 99.93 | 99.93 | 99.93 | 99.93 | 99.87 | 99.93 | 99.8  | 99.06 | 99.13 |

|                                                    |                                                    |       |       |       |       |       |       |       |       |       |       |       |       |       |       |       |       |       |       |       |       |       |       |
|----------------------------------------------------|----------------------------------------------------|-------|-------|-------|-------|-------|-------|-------|-------|-------|-------|-------|-------|-------|-------|-------|-------|-------|-------|-------|-------|-------|-------|
|                                                    | A/Kelp Gull/Hound Bay/133747/2023                  | 99.8  | 100   | 99.6  | 99.8  | 99.87 | 99.87 | 99.67 | 99.87 | 99.87 | 99.87 | 99.87 | 99.87 | 99.87 | 99.87 | 99.87 | 99.87 | 99.87 | 99.8  | 99.87 | 99.73 | 99    | 99.06 |
|                                                    | A/Brown Skua/Moltke Harbour/133752/2023            | 99.67 | 99.6  | 100   | 99.8  | 99.73 | 99.6  | 99.4  | 99.73 | 99.73 | 99.73 | 99.73 | 99.73 | 99.73 | 99.73 | 99.73 | 99.73 | 99.73 | 99.67 | 99.73 | 99.6  | 98.86 | 98.93 |
|                                                    | A/Kelp Gull/Moltke Harbour/133754/2023             | 99.86 | 99.8  | 99.8  | 100   | 99.93 | 99.8  | 99.59 | 99.93 | 99.93 | 99.93 | 99.93 | 99.93 | 99.93 | 99.93 | 99.93 | 99.93 | 99.93 | 99.86 | 99.93 | 99.8  | 99.05 | 99.12 |
|                                                    | A/Brown Skua/Moltke Harbour/133755/2023            | 99.93 | 99.87 | 99.73 | 99.93 | 100   | 99.87 | 99.67 | 100   | 100   | 100   | 100   | 100   | 100   | 100   | 100   | 100   | 100   | 99.93 | 100   | 99.87 | 99.13 | 99.2  |
|                                                    | A/Kelp Gull/Harpon Bay/133943/2023                 | 99.93 | 99.87 | 99.6  | 99.8  | 99.87 | 100   | 99.67 | 99.87 | 99.87 | 99.87 | 99.87 | 99.87 | 99.87 | 99.87 | 99.87 | 99.87 | 99.87 | 99.8  | 99.87 | 99.73 | 99    | 99.06 |
|                                                    | A/Brown Skua/Hound Bay/133947/2023                 | 99.6  | 99.67 | 99.4  | 99.59 | 99.67 | 99.67 | 100   | 99.67 | 99.67 | 99.67 | 99.67 | 99.67 | 99.67 | 99.67 | 99.67 | 99.67 | 99.67 | 99.6  | 99.67 | 99.53 | 98.8  | 98.86 |
|                                                    | A/Brown Skua/Hound Bay/133949/2023                 | 99.93 | 99.87 | 99.73 | 99.93 | 100   | 99.87 | 99.67 | 100   | 100   | 100   | 100   | 100   | 100   | 100   | 100   | 100   | 100   | 99.93 | 100   | 99.87 | 99.13 | 99.2  |
|                                                    | A/Brown skua/Bird Island/128289/2023               | 99.93 | 99.87 | 99.73 | 99.93 | 100   | 99.87 | 99.67 | 100   | 100   | 100   | 100   | 100   | 100   | 100   | 100   | 100   | 100   | 99.93 | 100   | 99.87 | 99.13 | 99.2  |
|                                                    | A/Brown skua/Bird Island/128288/2023               | 99.93 | 99.87 | 99.73 | 99.93 | 100   | 99.87 | 99.67 | 100   | 100   | 100   | 100   | 100   | 100   | 100   | 100   | 100   | 100   | 99.93 | 100   | 99.87 | 99.13 | 99.2  |
|                                                    | A/Brown skua/Bird Island/128287/2023               | 99.93 | 99.87 | 99.73 | 99.93 | 100   | 99.87 | 99.67 | 100   | 100   | 100   | 100   | 100   | 100   | 100   | 100   | 100   | 100   | 99.93 | 100   | 99.87 | 99.13 | 99.2  |
|                                                    | A/Kelp Gull/Penguin River/141239/2023              | 99.93 | 99.87 | 99.73 | 99.93 | 100   | 99.87 | 99.67 | 100   | 100   | 100   | 100   | 100   | 100   | 100   | 100   | 100   | 100   | 99.93 | 100   | 99.87 | 99.13 | 99.2  |
|                                                    | A/Brown Skua/Penguin River/141236/2023             | 99.93 | 99.87 | 99.73 | 99.93 | 100   | 99.87 | 99.67 | 100   | 100   | 100   | 100   | 100   | 100   | 100   | 100   | 100   | 100   | 99.93 | 100   | 99.87 | 99.13 | 99.2  |
|                                                    | A/Kelp Gull/Penguin River/141234/2023              | 99.93 | 99.87 | 99.73 | 99.93 | 100   | 99.87 | 99.67 | 100   | 100   | 100   | 100   | 100   | 100   | 100   | 100   | 100   | 100   | 99.93 | 100   | 99.87 | 99.13 | 99.2  |
|                                                    | A/Brown Skua/Bird Island/141232/2023               | 99.93 | 99.87 | 99.73 | 99.93 | 100   | 99.87 | 99.67 | 100   | 100   | 100   | 100   | 100   | 100   | 100   | 100   | 100   | 100   | 99.93 | 100   | 99.87 | 99.13 | 99.2  |
|                                                    | A/Southern Elephant Seal/Jason Harbour/141078/2023 | 99.87 | 99.8  | 99.67 | 99.86 | 99.93 | 99.8  | 99.6  | 99.93 | 99.93 | 99.93 | 99.93 | 99.93 | 99.93 | 99.93 | 99.93 | 99.93 | 99.93 | 100   | 99.93 | 99.93 | 99.06 | 99.13 |
|                                                    | A/Antarctic Fur Seal/Jason Harbour/141037/2023     | 99.93 | 99.87 | 99.73 | 99.93 | 100   | 99.87 | 99.67 | 100   | 100   | 100   | 100   | 100   | 100   | 100   | 100   | 100   | 100   | 99.93 | 100   | 99.87 | 99.13 | 99.2  |
|                                                    | A/Southern Elephant Seal/Jason Harbour/141027/2023 | 99.8  | 99.73 | 99.6  | 99.8  | 99.87 | 99.73 | 99.53 | 99.87 | 99.87 | 99.87 | 99.87 | 99.87 | 99.87 | 99.87 | 99.87 | 99.87 | 99.87 | 99.93 | 99.87 | 100   | 99    | 99.06 |
|                                                    | A/Southern Fulmar/Falkland Islands/138870/2023     | 99.06 | 99    | 98.86 | 99.05 | 99.13 | 99    | 98.8  | 99.13 | 99.13 | 99.13 | 99.13 | 99.13 | 99.13 | 99.13 | 99.13 | 99.13 | 99.13 | 99.06 | 99.13 | 99    | 100   | 99.93 |
|                                                    | A/Southern fulmar/Falkland Islands/133789/2023     | 99.13 | 99.06 | 98.93 | 99.12 | 99.2  | 99.06 | 98.86 | 99.2  | 99.2  | 99.2  | 99.2  | 99.2  | 99.2  | 99.2  | 99.2  | 99.2  | 99.2  | 99.13 | 99.2  | 99.06 | 99.93 | 100   |
| NA                                                 | A/Kelp Gull/Hound Bay/133744/2023                  | 100   | 99.79 | 99.72 | 99.79 | 99.65 | 99.79 | 99.79 | 99.72 | 99.57 | 99.57 | 99.57 | 99.57 | 99.72 | 99.72 | 99.79 | 99.72 | 99.79 | 99.79 | 99.72 | 99.79 | 99.08 | 99.01 |
|                                                    | A/Kelp Gull/Hound Bay/133747/2023                  | 99.79 | 100   | 99.93 | 100   | 99.72 | 99.72 | 100   | 99.93 | 99.79 | 99.79 | 99.79 | 99.93 | 99.93 | 100   | 99.93 | 100   | 99.93 | 100   | 99.93 | 100   | 99.29 | 99.22 |
|                                                    | A/Brown Skua/Moltke Harbour/133752/2023            | 99.72 | 99.93 | 100   | 99.93 | 99.57 | 99.57 | 99.86 | 99.93 | 99.65 | 99.65 | 99.65 | 99.79 | 99.79 | 99.86 | 99.79 | 99.86 | 99.79 | 99.86 | 99.79 | 99.86 | 99.15 | 99.08 |
|                                                    | A/Kelp Gull/Moltke Harbour/133754/2023             | 99.79 | 100   | 99.93 | 100   | 99.72 | 99.72 | 100   | 99.93 | 99.79 | 99.79 | 99.79 | 99.93 | 99.93 | 100   | 99.93 | 100   | 99.93 | 100   | 99.93 | 100   | 99.29 | 99.22 |
|                                                    | A/Brown Skua/Moltke Harbour/133755/2023            | 99.65 | 99.72 | 99.57 | 99.72 | 100   | 99.57 | 99.72 | 99.65 | 99.5  | 99.5  | 99.5  | 99.65 | 99.65 | 99.72 | 99.65 | 99.72 | 99.65 | 99.72 | 99.65 | 99.72 | 99.01 | 98.94 |
|                                                    | A/Kelp Gull/Harpon Bay/133943/2023                 | 99.79 | 99.72 | 99.57 | 99.72 | 99.57 | 100   | 99.72 | 99.65 | 99.5  | 99.5  | 99.5  | 99.65 | 99.65 | 99.72 | 99.65 | 99.72 | 99.65 | 99.72 | 99.65 | 99.72 | 99.01 | 98.94 |
|                                                    | A/Brown Skua/Hound Bay/133947/2023                 | 99.79 | 100   | 99.86 | 100   | 99.72 | 99.72 | 100   | 99.93 | 99.79 | 99.79 | 99.79 | 99.93 | 99.93 | 100   | 99.93 | 100   | 99.93 | 100   | 99.93 | 100   | 99.29 | 99.22 |
|                                                    | A/Brown Skua/Hound Bay/133949/2023                 | 99.72 | 99.93 | 99.93 | 99.93 | 99.65 | 99.65 | 99.93 | 100   | 99.72 | 99.72 | 99.72 | 99.86 | 99.86 | 99.93 | 99.86 | 99.93 | 99.86 | 99.93 | 99.86 | 99.93 | 99.22 | 99.15 |
|                                                    | A/Brown skua/Bird Island/128289/2023               | 99.57 | 99.79 | 99.65 | 99.79 | 99.5  | 99.5  | 99.79 | 99.72 | 100   | 99.86 | 99.86 | 99.72 | 99.72 | 99.79 | 99.72 | 99.79 | 99.72 | 99.79 | 99.72 | 99.79 | 99.08 | 99.01 |
|                                                    | A/Brown skua/Bird Island/128288/2023               | 99.57 | 99.79 | 99.65 | 99.79 | 99.5  | 99.5  | 99.79 | 99.72 | 99.86 | 100   | 100   | 99.72 | 99.72 | 99.79 | 99.72 | 99.79 | 99.72 | 99.79 | 99.72 | 99.79 | 99.08 | 99.01 |
|                                                    | A/Brown skua/Bird Island/128287/2023               | 99.57 | 99.79 | 99.65 | 99.79 | 99.5  | 99.5  | 99.79 | 99.72 | 99.86 | 100   | 100   | 99.72 | 99.72 | 99.79 | 99.72 | 99.79 | 99.72 | 99.79 | 99.72 | 99.79 | 99.08 | 99.01 |
|                                                    | A/Kelp Gull/Penguin River/141239/2023              | 99.72 | 99.93 | 99.79 | 99.93 | 99.65 | 99.65 | 99.93 | 99.86 | 99.72 | 99.72 | 99.72 | 100   | 100   | 99.93 | 100   | 99.93 | 100   | 99.93 | 100   | 99.93 | 99.22 | 99.15 |
|                                                    | A/Brown Skua/Penguin River/141236/2023             | 99.72 | 99.93 | 99.79 | 99.93 | 99.65 | 99.65 | 99.93 | 99.86 | 99.72 | 99.72 | 99.72 | 100   | 100   | 99.93 | 100   | 99.93 | 100   | 99.93 | 100   | 99.93 | 99.22 | 99.15 |
|                                                    | A/Kelp Gull/Penguin River/141234/2023              | 99.79 | 100   | 99.86 | 100   | 99.72 | 99.72 | 100   | 99.93 | 99.79 | 99.79 | 99.79 | 99.93 | 99.93 | 100   | 99.93 | 100   | 99.93 | 100   | 99.93 | 100   | 99.29 | 99.22 |
|                                                    | A/Brown Skua/Bird Island/141232/2023               | 99.72 | 99.93 | 99.79 | 99.93 | 99.65 | 99.65 | 99.93 | 99.86 | 99.72 | 99.72 | 99.72 | 100   | 100   | 99.93 | 100   | 99.93 | 100   | 99.93 | 100   | 99.93 | 99.22 | 99.15 |
|                                                    | A/Southern Elephant Seal/Jason Harbour/141078/2023 | 99.79 | 100   | 99.86 | 100   | 99.72 | 99.72 | 100   | 99.93 | 99.79 | 99.79 | 99.79 | 99.93 | 99.93 | 100   | 99.93 | 100   | 99.93 | 100   | 99.93 | 100   | 99.29 | 99.22 |
|                                                    | A/Antarctic Fur Seal/Jason Harbour/141037/2023     | 99.72 | 99.93 | 99.79 | 99.93 | 99.65 | 99.65 | 99.93 | 99.86 | 99.72 | 99.72 | 99.72 | 100   | 100   | 99.93 | 100   | 99.93 | 100   | 99.93 | 100   | 99.93 | 99.22 | 99.15 |
| A/Southern Elephant Seal/Jason Harbour/141027/2023 | 99.79                                              | 100   | 99.86 | 100   | 99.72 | 99.72 | 100   | 99.93 | 99.79 | 99.79 | 99.79 | 99.93 | 99.93 | 100   | 99.93 | 100   | 99.93 | 100   | 99.93 | 100   | 99.29 | 99.22 |       |
| A/Southern Fulmar/Falkland Islands/138870/2023     | 99.08                                              | 99.29 | 99.15 | 99.29 | 99.01 | 99.01 | 99.29 | 99.22 | 99.08 | 99.08 | 99.08 | 99.22 | 99.22 | 99.29 | 99.22 | 99.29 | 99.22 | 99.29 | 99.22 | 99.29 | 100   | 99.65 |       |
| A/Southern fulmar/Falkland Islands/133789/2023     | 99.01                                              | 99.22 | 99.08 | 99.22 | 98.94 | 98.94 | 99.22 | 99.15 | 99.01 | 99.01 | 99.01 | 99.15 | 99.15 | 99.22 | 99.15 | 99.22 | 99.15 | 99.22 | 99.15 | 99.22 | 99.65 | 100   |       |
| MP                                                 | A/Kelp Gull/Hound Bay/133744/2023                  | 100   | 99.9  | 99.8  | 99.9  | 99.89 | 99.9  | 99.8  | 99.8  | 99.9  | 99.8  | 99.8  | 99.9  | 99.8  | 99.9  | 99.8  | 99.9  | 99.8  | 99.69 | 99.9  | 99.8  | 99.39 | 99.19 |
|                                                    | A/Kelp Gull/Hound Bay/133747/2023                  | 99.9  | 100   | 99.9  | 100   | 100   | 100   | 99.8  | 99.9  | 100   | 99.9  | 99.9  | 100   | 99.9  | 100   | 99.9  | 100   | 99.9  | 99.69 | 100   | 99.9  | 99.49 | 99.29 |
|                                                    | A/Brown Skua/Moltke Harbour/133752/2023            | 99.8  | 99.9  | 100   | 99.9  | 99.89 | 99.9  | 99.69 | 100   | 99.9  | 99.8  | 99.8  | 99.9  | 99.8  | 99.9  | 99.8  | 99.9  | 99.8  | 99.59 | 99.9  | 99.8  | 99.39 | 99.19 |
|                                                    | A/Kelp Gull/Moltke Harbour/133754/2023             | 99.9  | 100   | 99.9  | 100   | 100   | 100   | 99.8  | 99.9  | 100   | 99.9  | 99.9  | 100   | 99.9  | 100   | 99.9  | 100   | 99.9  | 99.69 | 100   | 99.9  | 99.49 | 99.29 |
|                                                    | A/Brown Skua/Moltke Harbour/133755/2023            | 99.89 | 100   | 99.89 | 100   | 100   | 100   | 99.79 | 99.89 | 100   | 99.89 | 99.89 | 100   | 99.89 | 100   | 99.89 | 100   | 99.89 | 99.68 | 100   | 99.89 | 99.47 | 99.26 |
|                                                    | A/Kelp Gull/Harpon Bay/133943/2023                 | 99.9  | 100   | 99.9  | 100   | 100   | 100   | 99.8  | 99.9  | 100   | 99.9  | 99.9  | 100   | 99.9  | 100   | 99.9  | 100   | 99.9  | 99.69 | 100   | 99.9  | 99.49 | 99.29 |
|                                                    | A/Brown Skua/Hound Bay/133947/2023                 | 99.8  | 99.8  | 99.69 | 99.8  | 99.79 | 99.8  | 100   | 99.69 | 99.8  | 99.69 | 99.69 | 99.8  | 99.69 | 99.8  | 99.69 | 99.8  | 99.69 | 99.49 | 99.8  | 99.69 | 99.49 | 99.29 |
|                                                    | A/Brown Skua/Hound Bay/133949/2023                 | 99.8  | 99.9  | 100   | 99.9  | 99.89 | 99.9  | 99.69 | 100   | 99.9  | 99.8  | 99.8  | 99.9  | 99.8  | 99.9  | 99.8  | 99.9  | 99.8  | 99.59 | 99.9  | 99.8  | 99.39 | 99.19 |
|                                                    | A/Brown skua/Bird Island/128289/2023               | 99.9  | 100   | 99.9  | 100   | 100   | 100   | 99.8  | 99.9  | 100   | 99.9  | 99.9  | 100   | 99.9  | 100   | 99.9  | 100   | 99.9  | 99.69 | 100   | 99.9  | 99.49 | 99.29 |
| A/Brown skua/Bird Island/128288/2023               | 99.8                                               | 99.9  | 99.8  | 99.9  | 99.89 | 99.9  | 99.69 | 99.8  | 99.9  | 100   | 100   | 99.9  | 99.8  | 99.9  | 99.8  | 99.9  | 99.8  | 99.59 | 99.9  | 99.8  | 99.39 | 99.19 |       |

|    |                                                    |       |       |       |       |       |       |       |       |       |       |       |       |       |       |       |       |       |       |       |       |
|----|----------------------------------------------------|-------|-------|-------|-------|-------|-------|-------|-------|-------|-------|-------|-------|-------|-------|-------|-------|-------|-------|-------|-------|
|    | A/Brown skua/Bird Island/128287/2023               | 99.8  | 99.9  | 99.8  | 99.9  | 99.89 | 99.9  | 99.69 | 99.8  | 99.9  | 100   | 100   | 99.9  | 99.8  | 99.9  | 99.8  | 99.59 | 99.9  | 99.8  | 99.39 | 99.19 |
|    | A/Kelp Gull/Penguin River/141239/2023              | 99.9  | 100   | 99.9  | 100   | 100   | 100   | 99.8  | 99.9  | 100   | 99.9  | 99.9  | 100   | 99.9  | 100   | 99.9  | 99.69 | 100   | 99.9  | 99.49 | 99.29 |
|    | A/Brown Skua/Penguin River/141236/2023             | 99.8  | 99.9  | 99.8  | 99.9  | 99.89 | 99.9  | 99.69 | 99.8  | 99.9  | 99.8  | 99.8  | 99.9  | 100   | 99.9  | 100   | 99.59 | 99.9  | 99.8  | 99.39 | 99.19 |
|    | A/Kelp Gull/Penguin River/141234/2023              | 99.9  | 100   | 99.9  | 100   | 100   | 100   | 99.8  | 99.9  | 100   | 99.9  | 99.9  | 100   | 99.9  | 100   | 99.9  | 99.69 | 100   | 99.9  | 99.49 | 99.29 |
|    | A/Brown Skua/Bird Island/141232/2023               | 99.8  | 99.9  | 99.8  | 99.9  | 99.89 | 99.9  | 99.69 | 99.8  | 99.9  | 99.8  | 99.8  | 99.9  | 100   | 99.9  | 100   | 99.59 | 99.9  | 99.8  | 99.39 | 99.19 |
|    | A/Southern Elephant Seal/Jason Harbour/141078/2023 | 99.59 | 99.69 | 99.59 | 99.69 | 99.68 | 99.69 | 99.49 | 99.59 | 99.69 | 99.59 | 99.59 | 99.69 | 99.59 | 99.69 | 99.59 | 100   | 99.69 | 99.8  | 99.19 | 98.98 |
|    | A/Antarctic Fur Seal/Jason Harbour/141037/2023     | 99.9  | 100   | 99.9  | 100   | 100   | 100   | 99.8  | 99.9  | 100   | 99.9  | 99.9  | 100   | 99.9  | 100   | 99.9  | 99.69 | 100   | 99.9  | 99.49 | 99.29 |
|    | A/Southern Elephant Seal/Jason Harbour/141027/2023 | 99.8  | 99.9  | 99.8  | 99.9  | 99.89 | 99.9  | 99.69 | 99.8  | 99.9  | 99.8  | 99.8  | 99.9  | 99.8  | 99.9  | 99.8  | 99.69 | 100   | 99.9  | 99.49 | 99.19 |
|    | A/Southern Fulmar/Falkland Islands/138870/2023     | 99.39 | 99.49 | 99.39 | 99.49 | 99.47 | 99.49 | 99.49 | 99.39 | 99.49 | 99.39 | 99.39 | 99.49 | 99.39 | 99.49 | 99.39 | 99.19 | 99.49 | 99.39 | 100   | 99.59 |
|    | A/Southern fulmar/Falkland Islands/133789/2023     | 99.19 | 99.29 | 99.19 | 99.29 | 99.26 | 99.29 | 99.29 | 99.19 | 99.29 | 99.19 | 99.19 | 99.29 | 99.19 | 99.29 | 99.19 | 98.98 | 99.29 | 99.19 | 99.59 | 100   |
| NS | A/Kelp Gull/Hound Bay/133744/2023                  | 100   | 100   | 99.88 | 99.88 | 100   | 100   | 100   | 100   | 99.88 | 99.88 | 99.88 | 100   | 100   | 100   | 100   | 99.76 | 100   | 99.88 | 99.28 | 99.28 |
|    | A/Kelp Gull/Hound Bay/133747/2023                  | 100   | 100   | 99.88 | 99.88 | 100   | 100   | 100   | 100   | 99.88 | 99.88 | 99.88 | 100   | 100   | 100   | 100   | 99.76 | 100   | 99.88 | 99.28 | 99.28 |
|    | A/Brown Skua/Moltke Harbour/133752/2023            | 99.88 | 99.88 | 100   | 99.76 | 99.88 | 99.88 | 99.88 | 99.88 | 99.76 | 99.76 | 99.76 | 99.88 | 99.88 | 99.88 | 99.88 | 99.64 | 99.88 | 99.76 | 99.16 | 99.16 |
|    | A/Kelp Gull/Moltke Harbour/133754/2023             | 99.88 | 99.88 | 99.76 | 100   | 99.88 | 99.88 | 99.88 | 99.88 | 99.76 | 99.76 | 99.76 | 99.88 | 99.88 | 99.88 | 99.88 | 99.64 | 99.88 | 99.76 | 99.16 | 99.16 |
|    | A/Brown Skua/Moltke Harbour/133755/2023            | 100   | 100   | 99.88 | 99.88 | 100   | 100   | 100   | 100   | 99.88 | 99.88 | 99.88 | 100   | 100   | 100   | 100   | 99.76 | 100   | 99.88 | 99.28 | 99.28 |
|    | A/Kelp Gull/Harpon Bay/133943/2023                 | 100   | 100   | 99.88 | 99.88 | 100   | 100   | 100   | 100   | 99.88 | 99.88 | 99.88 | 100   | 100   | 100   | 100   | 99.76 | 100   | 99.88 | 99.28 | 99.28 |
|    | A/Brown Skua/Hound Bay/133947/2023                 | 100   | 100   | 99.88 | 99.88 | 100   | 100   | 100   | 100   | 99.88 | 99.88 | 99.88 | 100   | 100   | 100   | 100   | 99.76 | 100   | 99.88 | 99.28 | 99.28 |
|    | A/Brown Skua/Hound Bay/133949/2023                 | 100   | 100   | 99.88 | 99.88 | 100   | 100   | 100   | 100   | 99.88 | 99.88 | 99.88 | 100   | 100   | 100   | 100   | 99.76 | 100   | 99.88 | 99.28 | 99.28 |
|    | A/Brown skua/Bird Island/128289/2023               | 99.88 | 99.88 | 99.76 | 99.76 | 99.88 | 99.88 | 99.88 | 99.88 | 100   | 100   | 100   | 99.88 | 99.88 | 99.88 | 99.88 | 99.64 | 99.88 | 99.76 | 99.16 | 99.16 |
|    | A/Brown skua/Bird Island/128288/2023               | 99.88 | 99.88 | 99.76 | 99.76 | 99.88 | 99.88 | 99.88 | 99.88 | 100   | 100   | 100   | 99.88 | 99.88 | 99.88 | 99.88 | 99.64 | 99.88 | 99.76 | 99.16 | 99.16 |
|    | A/Brown skua/Bird Island/128287/2023               | 99.88 | 99.88 | 99.76 | 99.76 | 99.88 | 99.88 | 99.88 | 99.88 | 100   | 100   | 100   | 99.88 | 99.88 | 99.88 | 99.88 | 99.64 | 99.88 | 99.76 | 99.16 | 99.16 |
|    | A/Kelp Gull/Penguin River/141239/2023              | 100   | 100   | 99.88 | 99.88 | 100   | 100   | 100   | 100   | 99.88 | 99.88 | 99.88 | 100   | 100   | 100   | 100   | 99.76 | 100   | 99.88 | 99.28 | 99.28 |
|    | A/Brown Skua/Penguin River/141236/2023             | 100   | 100   | 99.88 | 99.88 | 100   | 100   | 100   | 100   | 99.88 | 99.88 | 99.88 | 100   | 100   | 100   | 100   | 99.76 | 100   | 99.88 | 99.28 | 99.28 |
|    | A/Kelp Gull/Penguin River/141234/2023              | 100   | 100   | 99.88 | 99.88 | 100   | 100   | 100   | 100   | 99.88 | 99.88 | 99.88 | 100   | 100   | 100   | 100   | 99.76 | 100   | 99.88 | 99.28 | 99.28 |
|    | A/Brown Skua/Bird Island/141232/2023               | 100   | 100   | 99.88 | 99.88 | 100   | 100   | 100   | 100   | 99.88 | 99.88 | 99.88 | 100   | 100   | 100   | 100   | 99.76 | 100   | 99.88 | 99.28 | 99.28 |
|    | A/Southern Elephant Seal/Jason Harbour/141078/2023 | 99.76 | 99.76 | 99.64 | 99.64 | 99.76 | 99.76 | 99.76 | 99.76 | 99.64 | 99.64 | 99.64 | 99.76 | 99.76 | 99.76 | 99.76 | 100   | 99.76 | 99.88 | 99.05 | 99.05 |
|    | A/Antarctic Fur Seal/Jason Harbour/141037/2023     | 100   | 100   | 99.88 | 99.88 | 100   | 100   | 100   | 100   | 99.88 | 99.88 | 99.88 | 100   | 100   | 100   | 100   | 99.76 | 100   | 99.88 | 99.28 | 99.28 |
|    | A/Southern Elephant Seal/Jason Harbour/141027/2023 | 99.88 | 99.88 | 99.76 | 99.76 | 99.88 | 99.88 | 99.88 | 99.88 | 99.76 | 99.76 | 99.76 | 99.88 | 99.88 | 99.88 | 99.88 | 99.88 | 99.88 | 100   | 99.16 | 99.16 |
|    | A/Southern Fulmar/Falkland Islands/138870/2023     | 99.28 | 99.28 | 99.16 | 99.16 | 99.28 | 99.28 | 99.28 | 99.28 | 99.16 | 99.16 | 99.16 | 99.28 | 99.28 | 99.28 | 99.28 | 99.05 | 99.28 | 99.16 | 100   | 99.76 |
|    | A/Southern fulmar/Falkland Islands/133789/2023     | 99.28 | 99.28 | 99.16 | 99.16 | 99.28 | 99.28 | 99.28 | 99.28 | 99.16 | 99.16 | 99.16 | 99.28 | 99.28 | 99.28 | 99.28 | 99.05 | 99.28 | 99.16 | 99.76 | 100   |

**Supplementary Table 4: Amino acid polymorphisms in PB2 at positions associated with mammalian adaptation (271, 591, 627 and 701) in H5N1 HPAIV sequences derived from mammalian samples collected in South Georgia.**

| Sequence name                                      | Amino acid mammalian adaptation polymorphism in PB2 |       |       |       |
|----------------------------------------------------|-----------------------------------------------------|-------|-------|-------|
|                                                    | T271A                                               | Q591K | E627K | D701N |
| A/Southern Elephant Seal/Jason Harbour/141078/2023 | T                                                   | Q     | K     | D     |
| A/Antarctic Fur Seal/Jason Harbour/141037/2023     | T                                                   | Q     | E     | D     |
| A/Southern Elephant Seal/Jason Harbour/141027/2023 | T                                                   | Q     | E     | D     |

**Supplementary Table 5: Coverage statistics from whole genome sequencing (WGS) of influenza virus. Quality assessment of the WGS sequence obtained. For each segment the total reads, genome coverage and mean depth of reads were obtained using samtools.**

| Sample                                             | PB2    |              |            | PB1    |              |            | PA     |              |            | HA     |              |            | NP     |              |            | NA     |              |            | MP     |              |            | NS     |              |            |
|----------------------------------------------------|--------|--------------|------------|--------|--------------|------------|--------|--------------|------------|--------|--------------|------------|--------|--------------|------------|--------|--------------|------------|--------|--------------|------------|--------|--------------|------------|
|                                                    | Reads  | Coverage (%) | Mean depth | Reads  | Coverage (%) | Mean depth | Reads  | Coverage (%) | Mean depth | Reads  | Coverage (%) | Mean depth | Reads  | Coverage (%) | Mean depth | Reads  | Coverage (%) | Mean depth | Reads  | Coverage (%) | Mean depth | Reads  | Coverage (%) | Mean depth |
| A/Brown_skua/Bird_Island/128287/2023               | 15445  | 100          | 6940.48    | 67276  | 100          | 14014.2    | 7641   | 100          | 6720.09    | 53630  | 100          | 20189.5    | 26360  | 100          | 10641.5    | 43548  | 100          | 20878.1    | 88013  | 100          | 82366      | 154917 | 100          | 150789     |
| A/Brown_skua/Bird_Island/128288/2023               | 10018  | 100          | 2301.93    | 39926  | 100          | 8214.75    | 2635   | 100          | 1627.41    | 53823  | 100          | 18871.4    | 6540   | 100          | 2796.93    | 33318  | 100          | 12912.3    | 41378  | 100          | 35496      | 91534  | 100          | 89094      |
| A/Brown_skua/Bird_Island/128289/2023               | 150548 | 100          | 26613.2    | 183077 | 100          | 33444.1    | 62339  | 100          | 21845.3    | 81854  | 100          | 31548      | 5975   | 100          | 5528.35    | 88258  | 100          | 42637.4    | 156285 | 100          | 145460     | 291252 | 100          | 275522     |
| A/Southern_fulmar/Falkland_Islands/133789/2023     | 7117   | 100          | 2521.37    | 7490   | 100          | 3785.91    | 6875   | 100          | 4274.6     | 42297  | 100          | 14267.5    | 9874   | 100          | 7606.65    | 20983  | 100          | 9429.58    | 34693  | 100          | 28196      | 48784  | 100          | 43657      |
| A/Southern_Elephant_Seal/Jason_Harbour/141078/2023 | 77854  | 100          | 8280.18    | 131085 | 100          | 12614.2    | 84715  | 100          | 10383.1    | 3299   | 100          | 980214     | 1270   | 100          | 1083.03    | 2573   | 100          | 1217.09    | 7522   | 100          | 6573.8     | 10534  | 100          | 9551.4     |
| A/Antarctic_Fur_Seal/Jason_Harbour/141037/2023     | 5209   | 100          | 1092.46    | 14622  | 100          | 2432.99    | 5238   | 100          | 1184.95    | 6760   | 100          | 1794.37    | 1523   | 100          | 7690.25    | 4700   | 100          | 1844.01    | 7282   | 100          | 5078.3     | 12247  | 100          | 9097.9     |
| A/Southern_Elephant_Seal/Jason_Harbour/141027/2023 | 6862   | 100          | 720.391    | 6883   | 100          | 921895     | 5264   | 100          | 886007     | 2049   | 98.93        | 555.993    | 932    | 100          | 796.944    | 952    | 100          | 393.292    | 2310   | 100          | 1852.8     | 4193   | 100          | 3687.5     |
| A/Brown_Skua/Penguin_River/141236/2023             | 1627   | 100          | 329.997    | 3601   | 99.872       | 616627     | 1295   | 100          | 317.77     | 1519   | 100          | 404.896    | 422    | 100          | 185.876    | 1105   | 100          | 428.149    | 1773   | 100          | 1218.8     | 2873   | 100          | 2152.4     |
| A/Kelp_Gull/Penguin_River/141234/2023              | 1451   | 100          | 386.294    | 4439   | 100          | 857819     | 1677   | 100          | 533.127    | 2549   | 100          | 746.119    | 678    | 100          | 443.424    | 1789   | 100          | 753.149    | 4335   | 100          | 3576       | 6325   | 100          | 5422.6     |
| A/Brown_Skua/Bird_Island/141232/2023               | 2572   | 100          | 517.941    | 6559   | 100          | 1112.38    | 2371   | 100          | 589.732    | 3673   | 100          | 818.708    | 629    | 100          | 333.523    | 1935   | 100          | 733.156    | 3449   | 100          | 2331.8     | 6191   | 100          | 4090       |
| A/Kelp_Gull/Penguin_River/141239/2023              | 1950   | 100          | 452.795    | 6108   | 100          | 1004.29    | 2182   | 100          | 552.227    | 2374   | 100          | 694.721    | 638    | 100          | 403.801    | 2419   | 100          | 973.629    | 3385   | 100          | 2409.2     | 5179   | 100          | 4001.9     |
| A/Brown_Skua/Penguin_River/141240/2023             | 38441  | 100          | 10147.8    | 93973  | 100          | 23102.5    | 25487  | 100          | 9179.06    | 155400 | 100          | 51274.9    | 36935  | 100          | 26682.1    | 109978 | 100          | 46529.5    | 185374 | 100          | 165804     | 422546 | 100          | 397071     |
| A/South_Georgia_Shag/King_Edward_Cove/141245/2023  | 110921 | 100          | 26666.2    | 454414 | 100          | 75602.1    | 151232 | 100          | 37659.4    | 152245 | 100          | 42438.5    | 24862  | 100          | 14613.3    | 142366 | 100          | 57916.6    | 194922 | 100          | 145701     | 271286 | 100          | 232400     |
| A/Southern_Fulmar/Falkland_Islands/138870/2023     | 612101 | 100          | 32568.3    | 516329 | 100          | 28255.4    | 552035 | 100          | 30910.1    | 503783 | 100          | 34003.3    | 443806 | 100          | 35411.6    | 365059 | 100          | 30656.5    | 156767 | 100          | 18724      | 87122  | 100          | 12030      |
| A/Kelp_Gull/Hound_Bay/133744/2023                  | 2570   | 99.701       | 135.801    | 2371   | 99.317       | 126204     | 1806   | 99.821       | 101.549    | 2677   | 99.775       | 184.956    | 2232   | 97.189       | 182.154    | 1590   | 99.52        | 128.805    | 916    | 100          | 111.79     | 549    | 98.194       | 76.917     |
| A/Kelp_Gull/Hound_Bay/133747/2023                  | 815    | 95.088       | 43.5681    | 94.02  | 94.34.7      | 34.7945    | 99.653 | 99.418       | 99.511     | 99.859 | 99.775       | 99.60.2    | 99.646 | 99.189       | 97.613     | 99.406 | 97.737       | 99.33.9    | 99.243 | 99.026       | 99.29.294  | 99.132 | 98.100       | 17.525     |
| A/Brown_Skua/Moltke_Harbour/133752/2023            | 1011   | 99.317       | 53.9624    | 749    | 96.027       | 39.2952    | 901    | 99.687       | 49.2141    | 1351   | 99.606       | 92.3716    | 1110   | 99.361       | 89.7808    | 99.731 | 99.589       | 99.59.6    | 99.394 | 100          | 48.304     | 220    | 98.262       | 32.634     |
| A/Kelp_Gull/Moltke_Harbour/133754/2023             | 1197   | 98.847       | 67.6181    | 861    | 96.241       | 47.0662    | 917    | 99.239       | 54.0506    | 1288   | 99.606       | 94.1256    | 1113   | 94.633       | 93.5227    | 111787 | 99.931       | 67.7215    | 376    | 98.539       | 47.725     | 253    | 98.646       | 35.921     |
| A/Brown_Skua/Moltke_Harbour/133755/2023            | 1631   | 98.719       | 93.9671    | 1543   | 97.693       | 88.8065    | 1156   | 99.731       | 68.6955    | 1526   | 99.775       | 114.944    | 1494   | 98.083       | 128.494    | 99.683 | 99.931       | 61.6962    | 374    | 95.91        | 47.82      | 268    | 100          | 39.376     |



|                                                    |            |     |             |            |            |             |            |     |             |            |            |             |            |     |             |            |     |             |           |     |            |           |     |            |
|----------------------------------------------------|------------|-----|-------------|------------|------------|-------------|------------|-----|-------------|------------|------------|-------------|------------|-----|-------------|------------|-----|-------------|-----------|-----|------------|-----------|-----|------------|
| A/Brown_Skua/Hound_Bay/1339<br>47/2023             | 374<br>151 |     | 208<br>73   | 299<br>020 | 100        | 168<br>17.8 | 327<br>445 | 100 | 192<br>32.6 | 303<br>779 | 100        | 221<br>55.8 | 268<br>166 | 100 | 219<br>39.4 | 227<br>658 | 100 | 197<br>56.7 | 796<br>74 | 100 | 998<br>3.6 | 417<br>30 | 100 | 627<br>1.3 |
| A/Brown_Skua/Hound_Bay/1339<br>49/2023             | 290<br>600 | 100 | 164<br>36.4 | 221<br>570 | 99.<br>829 | 126<br>57.3 | 239<br>059 | 100 | 141<br>53.4 | 245<br>924 | 100        | 181<br>19   | 218<br>527 | 100 | 182<br>36.5 | 180<br>110 | 100 | 158<br>61.5 | 691<br>24 | 100 | 880<br>0   | 337<br>89 | 100 | 509<br>3.5 |
| A/Kelp_Gull/Harpon_Bay/133943<br>/2023             | 338<br>135 | 100 | 189<br>25.8 | 271<br>653 | 100        | 153<br>49.1 | 257<br>778 | 100 | 151<br>47.8 | 259<br>086 | 100        | 190<br>09.9 | 236<br>530 | 100 | 195<br>07.7 | 190<br>288 | 100 | 166<br>36.7 | 650<br>64 | 100 | 809<br>9.6 | 327<br>39 | 100 | 487<br>8   |
| A/Antarctic_tern/King_Edward_P<br>oint/141271/2023 | 915<br>95  | 100 | 495<br>4.25 | 667<br>17  | 100        | 364<br>4.45 | 786<br>31  | 100 | 454<br>3.74 | 734<br>09  | 99.<br>775 | 515<br>7.89 | 619<br>79  | 100 | 504<br>2.22 | 488<br>79  | 100 | 416<br>9.25 | 183<br>16 | 100 | 226<br>2.1 | 127<br>39 | 100 | 172<br>8.8 |

**Supplementary Table 6: Oligonucleotides used in this study.** FAM, Fluorescein; BHQ-1, black hole quencher 1; NFQ-MGB, nonfluorescent quencher-minor groove binder; APMV-1, avian paramyxovirus type-1.

| Purpose            | ID             | Type   | Sequence and modification (5'-3')             | Author                            | Refence                                                                                                                                                                                                        |
|--------------------|----------------|--------|-----------------------------------------------|-----------------------------------|----------------------------------------------------------------------------------------------------------------------------------------------------------------------------------------------------------------|
| M-gene RRT-PCR     | SVIP-MP-F      | Primer | GGC CCC CTC AAA GCC GA                        | Nagy et al.                       | <a href="https://doi.org/10.1371/journal.pone.0244669">https://doi.org/10.1371/journal.pone.0244669</a>                                                                                                        |
|                    | SVIP-MP-R      | Primer | CGT CTA CGY TGC AGT CC                        |                                   |                                                                                                                                                                                                                |
|                    | SVIP-MP-P2-MGB | Probe  | FAM-TCA CTK GGC ACG GTG AGC GT-NFQ-MGB        |                                   |                                                                                                                                                                                                                |
|                    | Sep1           | Primer | AGA TGA GTC TTC TAA CCG AGG TCG               | Spackman et al.                   | <a href="https://doi.org/10.1128/jcm.40.9.3256-3260.2002">https://doi.org/10.1128/jcm.40.9.3256-3260.2002</a>                                                                                                  |
|                    | Sep2           | Primer | TGC AAA AAC ATC TTC AAG TCT CTG               |                                   |                                                                                                                                                                                                                |
|                    | SePRO          | Probe  | FAM-TCA GGC CCC CTC AAA GCC GA-TAMRA          |                                   |                                                                                                                                                                                                                |
| H5-HP RRT-PCR      | 2344b_H5_F3    | Primer | CCT TGC GAC TGG GCT CAG                       | James et al.                      | <a href="https://doi.org/10.1016/j.jviromet.2022.114454">https://doi.org/10.1016/j.jviromet.2022.114454</a>                                                                                                    |
|                    | 2344b_H5_R2    | Primer | ATC AAC CAT TCC CTG CCA                       |                                   |                                                                                                                                                                                                                |
|                    | 2344b_DE_Sonde | Probe  | FAM-AGA AGA AAR AGA GGG CTG TTT GGG GCT-BHQ-1 |                                   |                                                                                                                                                                                                                |
| N1 RRT-PCR         | N1F2           | Primer | GTT TGA GTC TGT TGC TTG GTC                   | Payungporn et al.                 | <a href="https://doi.org/10.1016/j.jviromet.2005.08.004">https://doi.org/10.1016/j.jviromet.2005.08.004</a>                                                                                                    |
|                    | N1R1           | Primer | TGA TAG TGT CTG TTA TTA TGC C                 |                                   |                                                                                                                                                                                                                |
|                    | N1 probe       | Probe  | VIC-TTG TAT TTC AAT ACA GCC AC-NFQ-MGB        |                                   |                                                                                                                                                                                                                |
| APMV-1 RRT-PCR     | NDF            | Primer | GAG CTA ATG AAC ATT CTT TC                    | Sutton et al.                     | <a href="https://doi.org/10.1016/j.jviromet.2018.12.001">https://doi.org/10.1016/j.jviromet.2018.12.001</a>                                                                                                    |
|                    | NDR            | Primer | AAT AGG CGG ACC ACA TC TG                     |                                   |                                                                                                                                                                                                                |
|                    | LpromGB        | Probe  | FAM-CCA ATC AAC TTC CC-NFQ-MGB                |                                   |                                                                                                                                                                                                                |
|                    | LpromGB2       | Probe  | VIC-AAT AGT GTA TGA CAA CAC-NFQ-MGB           |                                   |                                                                                                                                                                                                                |
| WGS cDNA synthesis | Optil-F1       | Primer | TTACGCGCCAGCAAAGCAG                           | Chrzastek et al.<br>Leyson et al. | <a href="https://doi.org/10.1016/j.virol.2017.06.019">https://doi.org/10.1016/j.virol.2017.06.019</a><br><a href="https://doi.org/10.1016/j.virol.2019.08.020">https://doi.org/10.1016/j.virol.2019.08.020</a> |
|                    | Optil-F2       | Primer | GTTACGCGCCAGCGAAAGCAGG                        |                                   |                                                                                                                                                                                                                |
|                    | Optil-R1       | Primer | GTTACGCGCCAGTAGAAACAAG                        |                                   |                                                                                                                                                                                                                |

**Supplementary Table 7: GISAID reference numbers and isolate names for all sequences used to align to sequences generated during this study.**

| Isolate_Id       | Isolate_Name                                                        |
|------------------|---------------------------------------------------------------------|
| EPI_ISL_10220427 | A/red_fox/Netherlands/22002636-005/2022_ H5N1 _2022-02-07           |
| EPI_ISL_10993074 | A/Mallard/Netherlands/2/2022_ H5N1 _2022-02-14                      |
| EPI_ISL_11007539 | A/turkey/Bulgaria/755-1_22VIR778-4/2021_ H5N1 _2021-11-30           |
| EPI_ISL_11007542 | A/chicken/Niger/22VIR1409-13/2022_ H5N1 _2022-01-01                 |
| EPI_ISL_11007547 | A/chicken/Niger/22VIR1409-9/2022_ H5N1 _2022-01-01                  |
| EPI_ISL_11112342 | A/Barnacle_Goose/Netherlands/11/2022_ H5N1 _2022-02-09              |
| EPI_ISL_11112358 | A/European_Herring_Gull/Netherlands/2/2022_ H5N1 _2022-02-26        |
| EPI_ISL_11211731 | A/duck/Bangladesh/19D1818/2021_ H5N1 _2021-12-22                    |
| EPI_ISL_11259275 | A/whooper_swan/Ireland/032444_22VIR1325-2/2021_ H5N1 _2021-11-09    |
| EPI_ISL_11259299 | A/turkey/Spain/490-22_22VIR2142-26/2022_ H5N1 _2022-02-08           |
| EPI_ISL_11259304 | A/chicken/Spain/564-4_22VIR2142-30/2022_ H5N1 _2022-02-11           |
| EPI_ISL_11259315 | A/goose/Spain/88-3_22VIR2142-4/2022_ H5N1 _2022-01-10               |
| EPI_ISL_11327088 | A/chicken/Czech_Republic/61-1/2022_ H5N1 _2021-12-31                |
| EPI_ISL_11330431 | A/white-tailed_eagle/Hokkaido/22-RU-WTE-2/2022_ H5N1 _2022-01-02    |
| EPI_ISL_11561593 | A/black-headed_gull/England/388256/2022_ H5N1 _2022-02-03           |
| EPI_ISL_11633709 | A/Cygnus_columbianus/Hubei/128/2021_ H5N1 _2021-12-20               |
| EPI_ISL_11798571 | A/common_buzzard/Denmark/24271-1.02/2021-10-25_ H5N1 _2021-10-25    |
| EPI_ISL_11798572 | A/Eurasian_wigeon/Denmark/24066-9/2021-10-13_ H5N1 _2021-10-13      |
| EPI_ISL_11922811 | A/goose/Poland/H124_22VIR2515-5/2022_ H5N1 _2022-02-05              |
| EPI_ISL_11922815 | A/swan/Romania/16905_22VIR2749-1/2021_ H5N1 _2021-12-08             |
| EPI_ISL_11922817 | A/swan/Romania/10394_22VIR2749-3/2022_ H5N1 _2022-02-03             |
| EPI_ISL_11971481 | A/turkey/South_Dakota/22-008485-001-original/2022_ H5N1 _2022-03-21 |
| EPI_ISL_12069289 | A/Fox/Netherlands/EMC3/2022_ H5N1 _2022-01-22                       |
| EPI_ISL_12174842 | A/Ezo_red_fox/Hokkaido/1/2022_ H5N1 _2022-03-31                     |
| EPI_ISL_12223734 | A/grey_heron/Czech_Republic/25338-2/2021_ H5N1 _2021-12-18          |
| EPI_ISL_12514573 | A/Song_Thrush/Netherlands/1/2022_ H5N1 _2022-04-13                  |

|                  |                                                                     |
|------------------|---------------------------------------------------------------------|
| EPI_ISL_12572655 | A/duck/Guangdong/S4525/2021_ H5N1 _2021-12-08                       |
| EPI_ISL_12572659 | A/duck/Hubei/SE220/2022_ H5N1 _2022-01-10                           |
| EPI_ISL_12572661 | A/goose/Guizhou/S1541/2022_ H5N1 _2022-02-22                        |
| EPI_ISL_12572662 | A/goose/Hunan/SE284/2022_ H5N1 _2022-01-05                          |
| EPI_ISL_12690905 | A/chicken/New_York/22-009324-002-original/2022_ H5N1 _2022-03-28    |
| EPI_ISL_12749687 | A/turkey/Israel/537/2021_ H5N1 _2021-10-12                          |
| EPI_ISL_12917757 | A/turkey/Israel/564/2021_ H5N1 _2021-10-29                          |
| EPI_ISL_12968592 | A/Fancy_chicken/NL/FAV-0035/2021_ H5N1 _2021-12-17                  |
| EPI_ISL_13026106 | A/Canada_goose/Luxembourg/21239614/2021_ H5N1 _2021-12-10           |
| EPI_ISL_13052412 | A/turkey/Maine/22-009605-001-original/2022_ H5N1 _2022-03-28        |
| EPI_ISL_13052728 | A/fox/Wisconsin/22-014746-029-original/2022_ H5N1 _2022-05-06       |
| EPI_ISL_13199866 | A/sandwich_tern/Netherlands/22010161-001005/2022_ H5N1 _2022-05-30  |
| EPI_ISL_13285238 | A/turkey/South_Dakota/22-009980-002-original/2022_ H5N1 _2022-04-01 |
| EPI_ISL_13285245 | A/pheasant/Texas/22-009984-001-original/2022_ H5N1 _2022-03-29      |
| EPI_ISL_13352721 | A/whooper_swan/Henan/45/2021_ H5N1 _2021-12-17                      |
| EPI_ISL_13352728 | A/mandarin_duck/Henan/426/2021_ H5N1 _2021-12-17                    |
| EPI_ISL_13369746 | A/chicken/England/057016/2021_ H5N1 _2021-11-12                     |
| EPI_ISL_13369753 | A/barnacle_goose/Scotland/292583/2021_ H5N1 _2021-11-12             |
| EPI_ISL_13369780 | A/barnacle_goose/England/293809/2021_ H5N1 _2021-11-26              |
| EPI_ISL_13370519 | A/domestic_duck/England/066456/2021_ H5N1 _2021-12-06               |
| EPI_ISL_13370564 | A/chicken/Northern_Ireland/17903/2021_ H5N1 _2021-12-09             |
| EPI_ISL_13370573 | A/chicken/England/070277/2021_ H5N1 _2021-12-13                     |
| EPI_ISL_13370696 | A/turkey/England/007586/2022_ H5N1 _2022-01-23                      |
| EPI_ISL_13370914 | A/domestic_duck/England/029617/2022_ H5N1 _2022-03-20               |
| EPI_ISL_13370918 | A/domestic_duck/England/041295/2022_ H5N1 _2022-04-04               |
| EPI_ISL_13429293 | A/Black-headed_gull/Netherlands/5/2022_ H5N1 _2022-06-03            |
| EPI_ISL_13432604 | A/turkey/South_Dakota/22-010139-002-original/2022_ H5N1 _2022-04-04 |
| EPI_ISL_13453568 | A/turkey/England/081490/2022_ H5N1 _2022-06-05                      |
| EPI_ISL_13486831 | A/Common_eider/England/023549/2022_ H5N1 _2022-03-03                |
| EPI_ISL_13778474 | A/European_Herring_Gull/Netherlands/7/2022_ H5N1 _2022-06-07        |

|                  |                                                                       |
|------------------|-----------------------------------------------------------------------|
| EPI_ISL_13955204 | A/chicken/Czech_Republic/8028-1/2022_ H5N1 _2022-04-13                |
| EPI_ISL_13969426 | A/Gannet/Scotland/090910/2022_ H5N1 _2022-06-18                       |
| EPI_ISL_13990715 | A/Cygnus_olor/Spain/1675-1_22VIR6312-14/2022_ H5N1 _2022-04-26        |
| EPI_ISL_13990718 | A/Gypaetus_barbatus/Spain/1956-25_22VIR6312-19/2022_ H5N1 _2022-05-27 |
| EPI_ISL_14064890 | A/crow/Hokkaido/0103B073/2022_ H5N1 _2022-04-01                       |
| EPI_ISL_14065167 | A/white-tailed_eagle/Hokkaido/20220210001/2022_ H5N1 _2022-02-10      |
| EPI_ISL_14070455 | A/tanuki/Hokkaido/1/2022_ H5N1 _2022-04-01                            |
| EPI_ISL_14233925 | A/Common_Tern/Netherlands/20/2022_ H5N1 _2022-07-22                   |
| EPI_ISL_14393465 | A/Branta_canadensis/Belgium/4821_0001/2022_ H5N1 _2022-04-07          |
| EPI_ISL_14497855 | A/domestic_duck/England/104859/2022_ H5N1 _2022-08-05                 |
| EPI_ISL_14542488 | A/chicken/South_Africa/26683/2021_ H5N1 _2021-04-09                   |
| EPI_ISL_14571430 | A/common_tern/Germany-NI/AI03185/2022_ H5N1 _2022-06-07               |
| EPI_ISL_14573124 | A/Egyptian_goose/South_Africa/21050245A/2021_ H5N1 _2021-05-13        |
| EPI_ISL_14619009 | A/Hartlaubs_gull/South_Africa/21050295/2021_ H5N1 _2021-05-17         |
| EPI_ISL_14619020 | A/chicken/South_Africa/21050293/2021_ H5N1 _2021-05-17                |
| EPI_ISL_14619024 | A/chicken/South_Africa/21050299/2021_ H5N1 _2021-05-18                |
| EPI_ISL_14620233 | A/Buff_Orpington_chicken/South_Africa/21050364/2021_ H5N1 _2021-05-19 |
| EPI_ISL_14638201 | A/Hartlaubs_gull/South_Africa/21050388/2021_ H5N1 _2021-05-20         |
| EPI_ISL_14638909 | A/African_penguin/South_Africa/21050383/2021_ H5N1 _2021-05-20        |
| EPI_ISL_14639383 | A/Kelp_gull/South_Africa/21050387/2021_ H5N1 _2021-05-20              |
| EPI_ISL_14639837 | A/Spotted_eagle_owl/South_Africa/21050363/2021_ H5N1 _2021-05-20      |
| EPI_ISL_14644592 | A/African_barn_owl/South_Africa/21050429/2021_ H5N1 _2021-05-25       |
| EPI_ISL_14645331 | A/Black-headed_heron/South_Africa/2021_ H5N1 _2021-05-25              |
| EPI_ISL_14645717 | A/chicken/South_Africa/693781/2021_ H5N1 _2021-05-27                  |
| EPI_ISL_14646080 | A/pelican/South_Africa/21050494/2021_ H5N1 _2021-05-29                |
| EPI_ISL_14710708 | A/duck/South_Africa/21060064/2021_ H5N1 _2021-06-03                   |
| EPI_ISL_14710814 | A/African_fish_eagle/South_Africa/21060065/2021_ H5N1 _2021-06-03     |
| EPI_ISL_14760611 | A/goose/Italy/IZSLT_21VIR10273/2021_ H5N1 _2021-11-22                 |
| EPI_ISL_14760625 | A/chicken/Italy/21VIR10096/2021_ H5N1 _2021-11-23                     |
| EPI_ISL_14760649 | A/turkey/Italy/21VIR10396/2021_ H5N1 _2021-11-29                      |

|                  |                                                                 |
|------------------|-----------------------------------------------------------------|
| EPI_ISL_14760654 | A/chicken/Italy/21VIR10470/2021_ H5N1 _2021-11-30               |
| EPI_ISL_14761097 | A/turkey/Italy/21VIR11587-1/2021_ H5N1 _2021-12-23              |
| EPI_ISL_14761272 | A/turkey/Italy/IZSLT_22VIR366-3/2022_ H5N1 _2022-01-04          |
| EPI_ISL_14761373 | A/buzzard/Italy/22VIR767-2/2022_ H5N1 _2022-01-24               |
| EPI_ISL_14761407 | A/duck/Italy/22VIR1294-1/2022_ H5N1 _2022-02-08                 |
| EPI_ISL_14761428 | A/goose/Italy/22VIR1520/2022_ H5N1 _2022-02-14                  |
| EPI_ISL_14761496 | A/chicken/Italy/22VIR1953-4/2022_ H5N1 _2022-02-22              |
| EPI_ISL_14769967 | A/chicken/Lesotho/352.3/2021_ H5N1 _2021-06-05                  |
| EPI_ISL_14871335 | A/poultry/Benin/21-A-08-035-O/2021_ H5N1 _2021-09-01            |
| EPI_ISL_14917915 | A/breeding_hen/Poland/H361/2022_ H5N1 _2022-07-18               |
| EPI_ISL_14918031 | A/Sacred_ibis/South_Africa/21060395/2021_ H5N1 _2021-06-19      |
| EPI_ISL_14918305 | A/ostrich/South_Africa/21060357/2021_ H5N1 _2021-06-21          |
| EPI_ISL_14918893 | A/Blue_crane/South_Africa/21070050/2021_ H5N1 _2021-07-01       |
| EPI_ISL_14918903 | A/chicken/South_Africa/411255/2021_ H5N1 _2021-07-19            |
| EPI_ISL_14933722 | A/ostrich/South_Africa/21070586/2021_ H5N1 _2021-07-28          |
| EPI_ISL_14933723 | A/chicken/South_Africa/412372/2021_ H5N1 _2021-07-28            |
| EPI_ISL_14934607 | A/chicken/South_Africa/MAB/2021_ H5N1 _2021-08-27               |
| EPI_ISL_14934884 | A/chicken/South_Africa/412381/2021_ H5N1 _2021-09-08            |
| EPI_ISL_14973559 | A/Cape_gannet/South_Africa/21100108/2021_ H5N1 _2021-10-07      |
| EPI_ISL_14973864 | A/Cape_cormorant/South_Africa/21100109A/2021_ H5N1 _2021-10-07  |
| EPI_ISL_15004397 | A/turkey/Kansas/22-011119-004-original/2022_ H5N1 _2022-04-09   |
| EPI_ISL_15038822 | A/chicken/England/114595/2022_ H5N1 _2022-09-02                 |
| EPI_ISL_15063845 | A/snow_goose/Kansas/W22-177B/2022_ H5N1 _2022-03-04             |
| EPI_ISL_15072538 | A/chicken/Hokkaido/I-1/2022_ H5N1 _2022-04-16                   |
| EPI_ISL_15072539 | A/emu/Hokkaido/A-2/2022_ H5N1 _2022-04-16                       |
| EPI_ISL_15072540 | A/crow/Hokkaido/HU-1/2022_ H5N1 _2022-05-18                     |
| EPI_ISL_15078246 | A/fox/Wisconsin/22-014746-008-original/2022_ H5N1 _2022-05-03   |
| EPI_ISL_15088302 | A/Greylag_Goose/Netherlands/13/2022_ H5N1 _2022-08-27           |
| EPI_ISL_15088303 | A/Lesser_Black-backed_Gull/Netherlands/3/2022_ H5N1 _2022-08-29 |
| EPI_ISL_15267014 | A/Eurasian_Spoonbill/Netherlands/6/2022_ H5N1 _2022-06-16       |

|                  |                                                                          |
|------------------|--------------------------------------------------------------------------|
| EPI_ISL_15364797 | A/Mute_Swan/Netherlands/2/2022_ H5N1 _2022-09-19                         |
| EPI_ISL_15518267 | A/ural_owl/Finland/14041_21RS3535-7/2021_ H5N1 _2021-10-01               |
| EPI_ISL_15535272 | A/domestic_goose/Poland/H397-N/2022_ H5N1 _2022-09-20                    |
| EPI_ISL_15576616 | A/white-fronted_goose/Miyagi/0410D001/2022_ H5N1 _2022-10-04             |
| EPI_ISL_15581789 | A/Mallard/Netherlands/19/2022_ H5N1 _2022-10-12                          |
| EPI_ISL_15585755 | A/Chicken/England/129801/2022_ H5N1 _2022-10-10                          |
| EPI_ISL_15585763 | A/Turkey/England/127741/2022_ H5N1 _2022-10-06                           |
| EPI_ISL_15585843 | A/Turkey/England/130119/2022_ H5N1 _2022-10-10                           |
| EPI_ISL_15585883 | A/chicken/England/131258/2022_ H5N1 _2022-10-13                          |
| EPI_ISL_15586107 | A/Bufflehead_Duck/Northern_Ireland/012321/2022_ H5N1 _2022-10-10         |
| EPI_ISL_15586114 | A/Domestic_Duck/England/134267/2022_ H5N1 _2022-10-18                    |
| EPI_ISL_15614803 | A/ibis/Egypt/RLQP-229S/2022_ H5N1 _2022-06-17                            |
| EPI_ISL_15647836 | A/Mandarin_duck/Korea/WA496/2022_ H5N1 _2022-10-10                       |
| EPI_ISL_15676638 | A/mute_swan/Croatia/108/2022_ H5N1 _2022-10-18                           |
| EPI_ISL_15812579 | A/Anser_anser_domesticus/Belgium/10918_0002/2022_ H5N1 _2022-09-16       |
| EPI_ISL_15813940 | A/mixed_domestic_Anatidae/Belgium/12318_0001/2022_ H5N1 _2022-10-24      |
| EPI_ISL_15814043 | A/Gallus_gallus/Belgium/12395_0002/2022_ H5N1 _2022-10-24                |
| EPI_ISL_15837655 | A/chicken/South_Africa/21080238/2021_ H5N1 _2022-10-10                   |
| EPI_ISL_15837851 | A/Cape_cormorant/South_Africa/21100176B/2021_ H5N1 _2021-10-11           |
| EPI_ISL_15838197 | A/White_breasted_cormorant/South_Africa/21100215/2021_ H5N1 _2021-10-13  |
| EPI_ISL_15838583 | A/Northern_giant_petrel/South_Africa/21100283/2021_ H5N1 _2021-10-16     |
| EPI_ISL_15838771 | A/chicken/South_Africa/236744/2021_ H5N1 _2021-10-19                     |
| EPI_ISL_15852340 | A/cormorant/South_Africa/21120147/2021_ H5N1 _2021-12-06                 |
| EPI_ISL_15852552 | A/Kelp_gull/South_Africa/22010082/2022_ H5N1 _2022-01-07                 |
| EPI_ISL_15852846 | A/chicken/South_Africa/QF22465/2022_ H5N1 _2022-02-07                    |
| EPI_ISL_15853343 | A/wild_duck/South_Africa/UP196/2022_ H5N1 _2022-02-15                    |
| EPI_ISL_15853608 | A/Common_tern/South_Africa/681998_CT010/2022_ H5N1 _2022-03-21           |
| EPI_ISL_15853610 | A/Swift_tern/South_Africa/681998_ST009/2022_ H5N1 _2022-03-22            |
| EPI_ISL_15853701 | A/Cape_cormorant/South_Africa/681998_DOA059/2022_ H5N1 _2022-03-23       |
| EPI_ISL_15853835 | A/African_black_oystercatcher/South_Africa/682489/2022_ H5N1 _2022-03-28 |

|                  |                                                                         |
|------------------|-------------------------------------------------------------------------|
| EPI_ISL_15853920 | A/Common_tern/South_Africa/686940_CT013/2022_ H5N1 _2022-05-10          |
| EPI_ISL_15857846 | A/turkey/Italy/22VIR10627-4/2022_ H5N1 _2022-11-02                      |
| EPI_ISL_15857961 | A/Goose/Italy/22VIR9673-3/2022_ H5N1 _2022-10-09                        |
| EPI_ISL_15857991 | A/Hawaiian_goose/Italy/22VIR9126-7/2022_ H5N1 _2022-09-23               |
| EPI_ISL_15925881 | A/Gadwall/Netherlands/2/2022_ H5N1 _2022-11-09                          |
| EPI_ISL_15925882 | A/Eurasian_Wigeon/Netherlands/3/2022_ H5N1 _2022-10-21                  |
| EPI_ISL_15925885 | A/Black-headed_Gull/Netherlands/11/2022_ H5N1 _2022-11-11               |
| EPI_ISL_15943015 | A/Wild_bird/Korea/K22-742/2022_ H5N1 _2022-11-07                        |
| EPI_ISL_15944663 | A/Spot-billed_duck/Korea/K22-856-2/2022_ H5N1 _2022-11-17               |
| EPI_ISL_15944667 | A/Spot-billed_duck/Korea/K22-920/2022_ H5N1 _2022-11-21                 |
| EPI_ISL_15957744 | A/Chicken/Scotland/141941/2022_ H5N1 _2022-10-30                        |
| EPI_ISL_15957798 | A/Turkey/England/143029/2022_ H5N1 _2022-11-01                          |
| EPI_ISL_15957899 | A/turkey/England/146512/2022_ H5N1 _2022-11-06                          |
| EPI_ISL_16013752 | A/Pelican/Venezuela/Pel3/2022_ H5N1 _2022-11-25                         |
| EPI_ISL_16113231 | A/tawny_owl/Denmark/05372-1.01/2022_ H5N1 _2022-06-08                   |
| EPI_ISL_16115054 | A/common_buzzard/Denmark/08287-1.01/2022_ H5N1 _2022-08-30              |
| EPI_ISL_16171323 | A/turkey/Minnesota/22-012126-003-original/2022_ H5N1 _2022-04-19        |
| EPI_ISL_16171452 | A/domestic_goose/Michigan/22-012855-004-original/2022_ H5N1 _2022-04-25 |
| EPI_ISL_16183504 | A/Chicken/AB/FAV-0222-01/2022_ H5N1 _2022-05-16                         |
| EPI_ISL_16196676 | A/duck/Cyprus/750-2_22VIR12133-10/2022_ H5N1 _2022-11-25                |
| EPI_ISL_16240382 | A/duck/Washington/22-014327-002-original/2022_ H5N1 _2022-05-07         |
| EPI_ISL_16243273 | A/fox/New_York/22-015065-001-original/2022_ H5N1 _2022-04-27            |
| EPI_ISL_16243894 | A/chicken/Idaho/22-015271-002-original/2022_ H5N1 _2022-05-16           |
| EPI_ISL_16249681 | A/chicken/Peru/LAM-INS-002/2022_ H5N1 _2022-11-28                       |
| EPI_ISL_16297063 | A/chicken/Montana/22-034813-003-original/2022_ H5N1 _2022-10-27         |
| EPI_ISL_16297332 | A/goose/Louisiana/22-033391-001-original/2022_ H5N1 _2022-10-14         |
| EPI_ISL_16384139 | A/domestic_goose/England/121576/2022_ H5N1 _2022-09-22                  |
| EPI_ISL_16384145 | A/Chicken/Scotland/153380/2022_ H5N1 _2022-11-19                        |
| EPI_ISL_16384147 | A/Chicken/England/155942/2022_ H5N1 _2022-11-20                         |
| EPI_ISL_16384178 | A/canada_goose/England/119770/2022_ H5N1 _2022-11-30                    |



|                  |                                                                     |
|------------------|---------------------------------------------------------------------|
| EPI_ISL_16384181 | A/mute_swan/England/119920/2022_ H5N1 _2022-12-06                   |
| EPI_ISL_16384193 | A/mute_swan/England/395769/2022_ H5N1 _2022-11-25                   |
| EPI_ISL_16388458 | A/whooper_swan/Akita/0511B002/2022_ H5N1 _2022-11-23                |
| EPI_ISL_16507106 | A/Ciconia_ciconia/Spain/22VIR12774-30_3394-2/2022_ H5N1 _2022-09-19 |
| EPI_ISL_16524203 | A/Black-headed_gull/Netherlands/12/2022_ H5N1 _2022-12-23           |
| EPI_ISL_16524248 | A/European_herring_gull/Netherlands/21/2022_ H5N1 _2022-12-27       |
| EPI_ISL_16549349 | A/Phasianus_colchicus/Belgium/10993-0003/2022_ H5N1 _2022-11-15     |
| EPI_ISL_16574657 | A/greylag_goose/England/120308/2022_ H5N1 _2022-12-15               |
| EPI_ISL_16574736 | A/goose/England/396398/2022_ H5N1 _2022-12-17                       |
| EPI_ISL_16641777 | A/sanderling/MA/22HP00192/2022_ H5N1 _2022-03-03                    |
| EPI_ISL_16641785 | A/common_tern/ME/COTE_20220614_1/2022_ H5N1 _2022-06-14             |
| EPI_ISL_16641791 | A/peregrine_falcon/MA/22MM00756/2022_ H5N1 _2022-06-16              |
| EPI_ISL_16641799 | A/northern_gannet/MA/22WI00050/2022_ H5N1 _2022-05-10               |
| EPI_ISL_16676447 | A/Common_tern/South_Africa/22060305/2022_ H5N1 _2022-06-17          |
| EPI_ISL_16676471 | A/Gallus_gallus/Belgium/00322-0002/2023_ H5N1 _2023-01-10           |
| EPI_ISL_16676474 | A/Gallus_gallus/Belgium/14733-0001/2022_ H5N1 _2022-12-20           |
| EPI_ISL_16698546 | A/eastern_buzzard/Niigata/1501B001/2022_ H5N1 _2022-10-21           |
| EPI_ISL_16741201 | A/duck/France/22P025078/2022_ H5N1 _2022-12-06                      |
| EPI_ISL_16811193 | A/turkey/England/006957/2023_ H5N1 _2023-01-11                      |
| EPI_ISL_16838579 | A/pelican/Russia/1032-1/2021_ H5N1 _2021-07-16                      |
| EPI_ISL_16839065 | A/Cormorant/Namibia/141/2022_ H5N1 _2022-01-27                      |
| EPI_ISL_16891400 | A/gray_gull/Chile/C61947/2022_ H5N1 _2022-12-02                     |
| EPI_ISL_16891402 | A/black_skimmer/Chile/C61962/2022_ H5N1 _2022-12-02                 |
| EPI_ISL_16904552 | A/Chicken/Scotland/172652/2022_ H5N1 _2022-12-14                    |
| EPI_ISL_16937292 | A/chicken/Czech_Republic/179/2023_ H5N1 _2023-01-04                 |
| EPI_ISL_16937301 | A/chicken/Czech_Republic/22969-5/2022_ H5N1 _2022-12-10             |
| EPI_ISL_16937302 | A/chicken/Czech_Republic/22968-3/2022_ H5N1 _2022-12-09             |
| EPI_ISL_16937309 | A/environment/Czech_Republic/1220-3_hall-8/2023_ H5N1 _2023-01-23   |
| EPI_ISL_16955748 | A/large-billed_crow/Hokkaido/0111E084/2022_ H5N1 _2022-11-24        |
| EPI_ISL_16955765 | A/large-billed_crow/Hokkaido/0112P083-2/2022_ H5N1 _2022-12-05      |

|                  |                                                                    |
|------------------|--------------------------------------------------------------------|
| EPI_ISL_16955798 | A/slaty-backed_gull/Hokkaido/0111M114/2022_ H5N1 _2022-11-16       |
| EPI_ISL_16979817 | A/black-headed_gull/Italy/23VIR1107-4/2022_ H5N1 _2022-12-30       |
| EPI_ISL_16997756 | A/chicken/Czech_Republic/1600-1/2023_ H5N1 _2023-01-29             |
| EPI_ISL_17011958 | A/Gull/Chile/7023-3/2022_ H5N1 _2022-12-07                         |
| EPI_ISL_17011959 | A/Pelican/Chile/6958-1/2022_ H5N1 _2022-12-06                      |
| EPI_ISL_17011963 | A/Pelican/Chile/6924-1/2022_ H5N1 _2022-12-06                      |
| EPI_ISL_17011964 | A/Gull/Chile/7023-2/2022_ H5N1 _2022-12-07                         |
| EPI_ISL_17012018 | A/Pelican/Chile/7087-1/2022_ H5N1 _2022-12-07                      |
| EPI_ISL_17015362 | A/chicken/Czech_Republic/2750-3/2023_ H5N1 _2023-02-16             |
| EPI_ISL_17033246 | A/Peregrine_falcon/Netherlands/5/2023_ H5N1 _2023-02-06            |
| EPI_ISL_17051025 | A/chicken/BC/AIVPHL-23/2022_ H5N1 _2022-05-02                      |
| EPI_ISL_17051082 | A/duck/BC/AIVPHL-135/2022_ H5N1 _2022-05-20                        |
| EPI_ISL_17051408 | A/northern_shoveler/BC/AIVPHL-239/2022_ H5N1 _2022-09-12           |
| EPI_ISL_17072111 | A/African_penguin/South_Africa/702626_AP821/2022_ H5N1 _2022-11-07 |
| EPI_ISL_17165500 | A/cygnus_olor/Romania/17142_23VIR1145-1/2022_ H5N1 _2022-11-15     |
| EPI_ISL_17165509 | A/turkey/Romania/10281_23VIR1145-10/2023_ H5N1 _2023-01-27         |
| EPI_ISL_17185876 | A/black_vulture/Georgia/W22-674/2022_ H5N1 _2022-08-24             |
| EPI_ISL_17185878 | A/black_vulture/Virginia/W22-667D/2022_ H5N1 _2022-08-22           |
| EPI_ISL_17214732 | A/greylag_goose/England/321390/2023_ H5N1 _2023-02-14              |
| EPI_ISL_17267428 | A/large-billed_crow/Hokkaido/B005/2022_ H5N1 _2022-12-21           |
| EPI_ISL_17317373 | A/large-billed_crow/Hokkaido/B00C/2022_ H5N1 _2022-12-19           |
| EPI_ISL_17353838 | A/chicken/Magdalena/ICA-3503/2022_ H5N1 _2022-11-18                |
| EPI_ISL_17414584 | A/avian/Nigeria/115_22VIR3286-61/2022_ H5N1 _2022-01-28            |
| EPI_ISL_17414588 | A/avian/Nigeria/658_22VIR3286-8/2021_ H5N1 _2021-10-28             |
| EPI_ISL_17414591 | A/avian/Nigeria/684_22VIR3286-12/2021_ H5N1 _2021-11-19            |
| EPI_ISL_17414594 | A/avian/Nigeria/737_22VIR3286-25/2021_ H5N1 _2021-12-24            |
| EPI_ISL_17414595 | A/avian/Nigeria/738_22VIR3286-26/2021_ H5N1 _2021-12-24            |
| EPI_ISL_17414596 | A/avian/Nigeria/739_22VIR3286-27/2021_ H5N1 _2021-12-24            |
| EPI_ISL_17414597 | A/avian/Nigeria/741_22VIR3286-29/2021_ H5N1 _2021-12-28            |
| EPI_ISL_17414600 | A/avian/Nigeria/VRD-21-019_21RS744-61/2021_ H5N1 _2021-01-22       |

|                  |                                                                      |
|------------------|----------------------------------------------------------------------|
| EPI_ISL_17414601 | A/avian/Nigeria/VRD-21-020_21RS744-62/2021_ H5N1 _2021-01-22         |
| EPI_ISL_17414608 | A/avian/Nigeria/VRD-21-140_21VIR7423-19/2021_ H5N1 _2021-03-12       |
| EPI_ISL_17414609 | A/avian/Nigeria/VRD-21-174_21VIR7423-22/2021_ H5N1 _2021-03-21       |
| EPI_ISL_17414610 | A/avian/Nigeria/VRD-21-181_21VIR7423-2/2021_ H5N1 _2021-03-23        |
| EPI_ISL_17414611 | A/chicken/Nigeria/001_22VIR3286-36/2022_ H5N1 _2022-01-04            |
| EPI_ISL_17414613 | A/chicken/Nigeria/011_22VIR3286-40/2022_ H5N1 _2022-01-07            |
| EPI_ISL_17414621 | A/chicken/Nigeria/037_22VIR3286-49/2022_ H5N1 _2022-01-13            |
| EPI_ISL_17414623 | A/chicken/Nigeria/042_22VIR3286-51/2022_ H5N1 _2022-01-15            |
| EPI_ISL_17414624 | A/chicken/Nigeria/048_22VIR3286-52/2022_ H5N1 _2022-01-17            |
| EPI_ISL_17414628 | A/chicken/Nigeria/078_22VIR3286-57/2022_ H5N1 _2022-01-22            |
| EPI_ISL_17414629 | A/chicken/Nigeria/082_22VIR3286-58/2022_ H5N1 _2022-01-24            |
| EPI_ISL_17414635 | A/chicken/Nigeria/146_22VIR3286-66/2022_ H5N1 _2022-02-01            |
| EPI_ISL_17414636 | A/chicken/Nigeria/149_22VIR3286-67/2022_ H5N1 _2022-02-02            |
| EPI_ISL_17414637 | A/chicken/Nigeria/157_22VIR3286-68/2022_ H5N1 _2022-02-03            |
| EPI_ISL_17414638 | A/chicken/Nigeria/164A_22VIR3286-69/2022_ H5N1 _2022-02-04           |
| EPI_ISL_17414642 | A/chicken/Nigeria/653_22VIR3286-6/2021_ H5N1 _2021-10-26             |
| EPI_ISL_17414643 | A/chicken/Nigeria/664_22VIR3286-9/2021_ H5N1 _2021-11-05             |
| EPI_ISL_17414644 | A/chicken/Nigeria/686-H5B04_22VIR3286-16/2021_ H5N1 _2021-12-20      |
| EPI_ISL_17414647 | A/chicken/Nigeria/709_22VIR3286-15/2021_ H5N1 _2021-12-06            |
| EPI_ISL_17414653 | A/chicken/Nigeria/746_22VIR3286-32/2021_ H5N1 _2021-12-29            |
| EPI_ISL_17414655 | A/chicken/Nigeria/VRD-21-212_21VIR7423-5/2021_ H5N1 _2021-04-03      |
| EPI_ISL_17414657 | A/chicken/Nigeria/VRD-21-338_21VIR7423-29/2021_ H5N1 _2021-06-30     |
| EPI_ISL_17414662 | A/goose/Nigeria/VRD-21-293_21VIR7423-26/2021_ H5N1 _2021-05-28       |
| EPI_ISL_17414663 | A/peacock/Nigeria/VRD-21-187_21VIR7423-4/2021_ H5N1 _2021-03-25      |
| EPI_ISL_17414664 | A/poultry/Nigeria/VRD-21-135_21VIR7423-18/2021_ H5N1 _2021-03-10     |
| EPI_ISL_17414668 | A/guinea_fowl/Nigeria/VRD-21-169_21VIR7423-21/2021_ H5N1 _2021-03-21 |
| EPI_ISL_17414669 | A/Falco_peregrinus/Beijing/1/_2022_ H5N1 _2022-10-09                 |
| EPI_ISL_17415170 | A/avian/Nigeria/271PT_22VIR3286-71/2021_ H5N1 _2021-01-01            |
| EPI_ISL_17424639 | A/blue-winged_teal/Texas/UGAI22-3189/2022_ H5N1 _2022-10             |
| EPI_ISL_17424649 | A/blue-winged_teal/Texas/UGAI22-2961/2022_ H5N1 _2022-09             |

|                  |                                                            |
|------------------|------------------------------------------------------------|
| EPI_ISL_17468386 | A/Chile/25945/2023_ H5N1 _2023-03-24                       |
| EPI_ISL_17470102 | A/chicken/Czech_Republic/3446_orig/2023_ H5N1 _2023-03-02  |
| EPI_ISL_17471324 | A/red-tailed_hawk/Kansas/W22-1226/2022_ H5N1 _2022-12-05   |
| EPI_ISL_17514130 | A/chicken/Austria/23006928-026/2023_ H5N1 _2023-01-20      |
| EPI_ISL_17514136 | A/coscoroba_swan/Austria/23005657-003/23_ H5N1 _2023-01-18 |
| EPI_ISL_17521022 | A/domestic_duck/England/049343/2023_ H5N1 _2023-03-30      |
| EPI_ISL_17521049 | A/black-headed_gull/England/053469/2023_ H5N1 _2023-03-23  |
| EPI_ISL_17529372 | A/duck/Egypt/RA19853OP/2021_ H5N1 _2021-12-15              |
| EPI_ISL_17583227 | A/Stone_Marten/Netherlands/EMC1/2022_ H5N1 _2022-01-16     |
| EPI_ISL_17606814 | A/mandarin_duck/Korea/H519/2021_ H5N1 _2021-11-05          |
| EPI_ISL_17606815 | A/mandarin_duck/Korea/WA622/2021_ H5N1 _2021-11-09         |
| EPI_ISL_17606816 | A/mandarin_duck/Korea/H552/2021_ H5N1 _2021-11-15          |
| EPI_ISL_17606817 | A/mallard/Korea/WA44/2022_ H5N1 _2022-01-13                |
| EPI_ISL_17606818 | A/wild_duck/Korea/H152/2022_ H5N1 _2022-02-08              |
| EPI_ISL_17606819 | A/duck/Korea/H535-2/2021_ H5N1 _2021-11-10                 |
| EPI_ISL_17606821 | A/duck/Korea/H550/2021_ H5N1 _2021-11-16                   |
| EPI_ISL_17606822 | A/duck/Korea/H554/2021_ H5N1 _2021-11-17                   |
| EPI_ISL_17606823 | A/chicken/Korea/H559/2021_ H5N1 _2021-11-21                |
| EPI_ISL_17606824 | A/duck/Korea/H560/2021_ H5N1 _2021-11-22                   |
| EPI_ISL_17606831 | A/duck/Korea/H621/2021_ H5N1 _2021-12-15                   |
| EPI_ISL_17606833 | A/quail/Korea/H624/2021_ H5N1 _2021-12-17                  |
| EPI_ISL_17606834 | A/chicken/Korea/H625/2021_ H5N1 _2021-12-20                |
| EPI_ISL_17606835 | A/chicken/Korea/H638/2021_ H5N1 _2021-12-23                |
| EPI_ISL_17606837 | A/duck/Korea/H649/2021_ H5N1 _2021-12-29                   |
| EPI_ISL_17606839 | A/duck/Korea/H38/2022_ H5N1 _2022-01-14                    |
| EPI_ISL_17606844 | A/duck/Korea/H79/2022_ H5N1 _2022-01-25                    |
| EPI_ISL_17606849 | A/Korean_native_chicken/Korea/H97/2022_ H5N1 _2022-02-03   |
| EPI_ISL_17606850 | A/chicken/Korea/H124/2022_ H5N1 _2022-02-04                |
| EPI_ISL_17606851 | A/Korean_native_chicken/Korea/H127/2022_ H5N1 _2022-02-06  |
| EPI_ISL_17606854 | A/chicken/Korea/H130/2022_ H5N1 _2022-02-07                |

|                  |                                                                        |
|------------------|------------------------------------------------------------------------|
| EPI_ISL_17606855 | A/duck/Korea/H138/2022_ H5N1 _2022-02-08                               |
| EPI_ISL_17606859 | A/chicken/Korea/H154-1/2022_ H5N1 _2022-02-13                          |
| EPI_ISL_17606860 | A/chicken/Korea/H155/2022_ H5N1 _2022-02-12                            |
| EPI_ISL_17606861 | A/duck/Korea/H196/2022_ H5N1 _2022-02-18                               |
| EPI_ISL_17606862 | A/duck/Korea/H200/2022_ H5N1 _2022-02-21                               |
| EPI_ISL_17606863 | A/duck/Korea/H232/2022_ H5N1 _2022-03-02                               |
| EPI_ISL_17606865 | A/duck/Korea/H543/2021_ H5N1 _2021-11-14                               |
| EPI_ISL_17638448 | A/chicken/Hokkaido/HU-B301/2023_ H5N1 _2023-04-06                      |
| EPI_ISL_17638492 | A/chicken/Niger/288-22_23VIR3551-5/2022_ H5N1 _2022-12-18              |
| EPI_ISL_17638493 | A/chicken/Niger/12-23_23VIR3551-8/2023_ H5N1 _2023-01-12               |
| EPI_ISL_17638499 | A/goose/Niger/41-23_23VIR3551-23/2023_ H5N1 _2023-01-28                |
| EPI_ISL_17638500 | A/chicken/Niger/43-23_23VIR3551-25/2023_ H5N1 _2023-01-28              |
| EPI_ISL_17638502 | A/chicken/Niger/51-23_23VIR3551-32/2023_ H5N1 _2023-02-02              |
| EPI_ISL_17638503 | A/goose/Niger/59-23_23VIR3551-35/2023_ H5N1 _2023-02-06                |
| EPI_ISL_17638504 | A/chicken/Niger/67-23_23VIR3551-36/2023_ H5N1 _2023-02-10              |
| EPI_ISL_17638505 | A/guinea_fowl/Niger/71-23_23VIR3551-38/2023_ H5N1 _2023-02-14          |
| EPI_ISL_17657734 | A/chicken/England/062635/2023_ H5N1 _2023-04-28                        |
| EPI_ISL_17660073 | A/owl/Peru/23-005629-001-original/2022_ H5N1 _2022-11-11               |
| EPI_ISL_17660074 | A/brown_booby/Peru/23-005629-003-original/2022_ H5N1 _2022-11-11       |
| EPI_ISL_17679737 | A/chicken/Italy/23VIR2802-7/2023_ H5N1 _2023-03-27                     |
| EPI_ISL_17679790 | A/teal/Italy/22VIR10396-3/2022_ H5N1 _2022-10-26                       |
| EPI_ISL_17679801 | A/seagull/Spain/4878-10_23VIR1687-18/2022_ H5N1 _2022-12-25            |
| EPI_ISL_17710031 | A/Black-Headed_Gull/England/259288/2023_ H5N1 _2023-04-14              |
| EPI_ISL_17710042 | A/Common_Buzzard/England/125155/2023_ H5N1 _2023-04-17                 |
| EPI_ISL_17716063 | A/black-headed_gull/Austria/23025916-001/2023_ H5N1 _2023-02-28        |
| EPI_ISL_17716064 | A/black-headed_gull/Austria/23030829-001/2023_ H5N1 _2023-03-08        |
| EPI_ISL_17716067 | A/black-headed_gull/Austria/23045023-001/2023_ H5N1 _2023-04-04        |
| EPI_ISL_17716080 | A/mute_swan/Austria/23001568-001/2023_ H5N1 _2023-01-05                |
| EPI_ISL_17732340 | A/peregrine_falcon/Czech_Republic/7735-2_chymus/2023_ H5N1 _2023-05-17 |
| EPI_ISL_17766057 | A/Ezo_red_fox/Hokkaido/2/2023_ H5N1 _2023-04-12                        |

|                  |                                                                        |
|------------------|------------------------------------------------------------------------|
| EPI_ISL_17777527 | A/gull/Peru/LIM-INS-006/2023_ H5N1 _2023-03-16                         |
| EPI_ISL_17777528 | A/peruvian_booby/Peru/CAL-INS-007/2023_ H5N1 _2023-03-17               |
| EPI_ISL_17777530 | A/guanay_cormorant/Peru/CAL-INS-009/2023_ H5N1 _2023-03-17             |
| EPI_ISL_17777532 | A/sea_lion/Peru/TAC-INS-011/2023_ H5N1 _2023-03-07                     |
| EPI_ISL_17805986 | A/chicken/Peru/AIS0546/2022_ H5N1 _2022-12-18                          |
| EPI_ISL_17805990 | A/chicken/Peru/AIS0543/2022_ H5N1 _2022-12-01                          |
| EPI_ISL_17805996 | A/chicken/Peru/AIS0549/2022_ H5N1 _2022-12-22                          |
| EPI_ISL_17805999 | A/lion/Peru/AIS0554/2023_ H5N1 _2023-02-08                             |
| EPI_ISL_17806001 | A/chicken/Peru/AIS0551/2022_ H5N1 _2022-12-12                          |
| EPI_ISL_17806003 | A/pelican/Peru/AISA0464/2022_ H5N1 _2022-11-22                         |
| EPI_ISL_17821065 | A/Black-headed_Gull/Netherlands/80/2023_ H5N1 _2023-05-24              |
| EPI_ISL_17830838 | A/Chroicocephalus_ridibundus/Belgium/01145_0006/2023_ H5N1 _2023-02-07 |
| EPI_ISL_17831040 | A/Falco_peregrinus/Belgium/04695_0002/2023_ H5N1 _2023-05-07           |
| EPI_ISL_17885849 | A/black_skimmer/Maule/240379/2023_ H5N1 _2023-03-06                    |
| EPI_ISL_17885869 | A/goose/Araucania/239189-1/2023_ H5N1 _2023-02-28                      |
| EPI_ISL_17885870 | A/chicken/OHiggins/241252-6/2023_ H5N1 _2023-03-12                     |
| EPI_ISL_17885874 | A/chicken/Nuble/241557-1/2023_ H5N1 _2023-03-10                        |
| EPI_ISL_17885877 | A/chicken/Nuble/240155/2023_ H5N1 _2023-03-06                          |
| EPI_ISL_17885878 | A/chicken/Nuble/239136/2023_ H5N1 _2023-02-27                          |
| EPI_ISL_17885912 | A/pelican/OHiggins/233721-1/2023_ H5N1 _2023-01-24                     |
| EPI_ISL_17885918 | A/pelican/Nuble/233947-2/2023_ H5N1 _2023-01-26                        |
| EPI_ISL_17885924 | A/pelican/Atacama/230158-2/2022_ H5N1 _2022-12-30                      |
| EPI_ISL_17885942 | A/pelican/Tarapaca/227436-2/2022_ H5N1 _2022-12-09                     |
| EPI_ISL_17885944 | A/pelican/Antofagasta/228244-2/2022_ H5N1 _2022-12-16                  |
| EPI_ISL_17885946 | A/chicken/Araucania/241892-2/2023_ H5N1 _2023-03-14                    |
| EPI_ISL_17885948 | A/humboldt_penguin/Coquimbo/239590/2023_ H5N1 _2023-02-28              |
| EPI_ISL_17885950 | A/great_egret/Araucania/240518/2023_ H5N1 _2023-03-07                  |
| EPI_ISL_17885951 | A/gray_gull/Tarapaca/232825-1/2023_ H5N1 _2023-01-18                   |
| EPI_ISL_17885955 | A/elegant_tern/Arica_y_Parinacota/229476-1/2022_ H5N1 _2022-12-24      |
| EPI_ISL_17885964 | A/turkey/Nuble/240489-1/2023_ H5N1 _2023-03-07                         |

|                  |                                                                         |
|------------------|-------------------------------------------------------------------------|
| EPI_ISL_17885965 | A/chiloe_wigeon/OHiggins/240893-2/2023_ H5N1 _2023-03-09                |
| EPI_ISL_17885967 | A/blackish_oystercatcher/OHiggins/240628/2023_ H5N1 _2023-03-06         |
| EPI_ISL_17885970 | A/turkey_vulture/Antofagasta/228252-1/2022_ H5N1 _2022-12-17            |
| EPI_ISL_17885972 | A/kelp_gull/Maule/239349/2023_ H5N1 _2023-03-01                         |
| EPI_ISL_17885973 | A/tern/Maule/238507/2023_ H5N1 _2023-02-23                              |
| EPI_ISL_17885976 | A/sea_lion/Arica_y_Parinacota/240270-1/2023_ H5N1 _2023-03-01           |
| EPI_ISL_17885978 | A/sanderling/Arica_y_Parinacota/240265/2023_ H5N1 _2023-03-03           |
| EPI_ISL_17885980 | A/sanderling/Arica_y_Parinacota/230758-1/2022_ H5N1 _2022-12-30         |
| EPI_ISL_17885982 | A/pelican/Valparaiso/234040/2023_ H5N1 _2023-01-25                      |
| EPI_ISL_17885983 | A/pelican/Valparaiso/233450-1/2023_ H5N1 _2023-01-23                    |
| EPI_ISL_17949961 | A/large-billed_crow/Kanagawa/1403C006/2023_ H5N1 _2023-03-10            |
| EPI_ISL_17949986 | A/large-billed_crow/Niigata/1502B004/2023_ H5N1 _2023-02-07             |
| EPI_ISL_17950253 | A/large-billed_crow/Hokkaido/0103E089/2023_ H5N1 _2023-03-30            |
| EPI_ISL_17964940 | A/sanderling/Oregon/23-011962-001-original/2023_ H5N1 _2023-04-13       |
| EPI_ISL_17973458 | A/wildbird-Fregata-magnificens/Ecuador/IC06-4590/2023_ H5N1 _2023-01-11 |
| EPI_ISL_17985398 | A/Black-headed_Gull/Netherlands/87/2023_ H5N1 _2023-06-16               |
| EPI_ISL_17985406 | A/Black-headed_Gull/Netherlands/96/2023_ H5N1 _2023-06-20               |
| EPI_ISL_17996130 | A/sandwich_tern/Italy/23VIR5828-2/2023_ H5N1 _2023-06-16                |
| EPI_ISL_17999470 | A/peregrine_falcon/Niigata/1510C001T/2022_ H5N1 _2022-10-16             |
| EPI_ISL_18007232 | A/large-billed_crow/Niigata/1503B017/2023_ H5N1 _2023-03-24             |
| EPI_ISL_18032447 | A/domestic_goose/Poland/H440/2022_ H5N1 _2022-12-17                     |
| EPI_ISL_18033169 | A/domestic_duck/Poland/H70-T1/2023_ H5N1 _2023-01-16                    |
| EPI_ISL_18033182 | A/domestic_duck/Poland/H101-T2/2023_ H5N1 _2023-02-03                   |
| EPI_ISL_18033206 | A/black_headed_gull/Poland/MB142-T/2023_ H5N1 _2023-04-20               |
| EPI_ISL_18033230 | A/mute_swan/Poland/MB203-NJ/2023_ H5N1 _2023-05-11                      |
| EPI_ISL_18033235 | A/common_tern/Poland/MB247-5/2023_ H5N1 _2023-05-30                     |
| EPI_ISL_18054502 | A/Sea_Lion/Peru/LIM-SER036/2023_ H5N1 _2023-01-23                       |
| EPI_ISL_18054509 | A/sea_lion/Peru/AQP-SER00K/2023_ H5N1 _2023-02-07                       |
| EPI_ISL_18065343 | A/partridge/England/097407/2023_ H5N1 _2023-07-23                       |
| EPI_ISL_18066450 | A/large-billed_crow/Miyazaki/4501A501/2023_ H5N1 _2023-01-06            |

|                  |                                                                           |
|------------------|---------------------------------------------------------------------------|
| EPI_ISL_18066451 | A/whooper_swan/Tochigi/0902C010/2023_ H5N1 _2023-02-09                    |
| EPI_ISL_18066454 | A/black-throated_crane/Tokyo/1302005b/2023_ H5N1 _2023-02-23              |
| EPI_ISL_18066455 | A/northern_goshawk/Shizuoka/2201D004/2023_ H5N1 _2023-01-07               |
| EPI_ISL_18066456 | A/Eurasian_Jay/Tochigi/0902A011/2023_ H5N1 _2023-02-20                    |
| EPI_ISL_18066457 | A/large-billed_crow/Fukuoka/4002A005/2023_ H5N1 _2023-02-06               |
| EPI_ISL_18071580 | A/goose/Magadan/2272-5/2022_ H5N1 _2022-10-09                             |
| EPI_ISL_18075716 | A/sandwich_tern/Spain/2740-23-2023_23VIR6502-23/2023_ H5N1 _2023-06-07    |
| EPI_ISL_18075717 | A/gull-billed_tern/Spain/2740-28-2023_23VIR6502-24/2023_ H5N1 _2023-06-07 |
| EPI_ISL_18102701 | A/feline/South_Korea/SNU-02/2023_ H5N1 _2023-07-04                        |
| EPI_ISL_18122446 | A/black-headed-gull/Finland/7826/2023_ H5N1 _2023-07-11                   |
| EPI_ISL_18123937 | A/black-headed-gull/Finland/7898/2023_ H5N1 _2023-07-13                   |
| EPI_ISL_18127713 | A/wild_bird/Gambia/23_198_TJ008_23VIR5825-8/2023_ H5N1 _2023-04-01        |
| EPI_ISL_18130247 | A/large-billed_crow/Saitama/1101020/2023_ H5N1 _2023-01-05                |
| EPI_ISL_18132189 | A/Snow_Goose/Missouri/USDA-007698-003/2022_ H5N1 _2022-03-04              |
| EPI_ISL_18132213 | A/Tundra_Swan/Michigan/USDA-008506-009/2022_ H5N1 _2022-03-17             |
| EPI_ISL_18132254 | A/turkey/Indiana/USDA-003707-003/2022_ H5N1 _2022-02-07                   |
| EPI_ISL_18132257 | A/Snow_Goose/South_Dakota/USDA-009478-006/2022_ H5N1 _2022-03-18          |
| EPI_ISL_18132382 | A/Mute_Swan/Michigan/USDA-011517-011/2022_ H5N1 _2022-04-11               |
| EPI_ISL_18132441 | A/chicken/Delaware/USDA-005260-001/2022_ H5N1 _2022-02-21                 |
| EPI_ISL_18132450 | A/Ross's_Goose/Colorado/USDA-008935-005/2022_ H5N1 _2022-03-18            |
| EPI_ISL_18132467 | A/Snow_Goose/Iowa/USDA-008719-002/2022_ H5N1 _2022-03-22                  |
| EPI_ISL_18132490 | A/Ross's_Goose/North_Dakota/USDA-011033-001/2022_ H5N1 _2022-04-05        |
| EPI_ISL_18132491 | A/turkey/Wisconsin/USDA-012973-001/2022_ H5N1 _2022-04-25                 |
| EPI_ISL_18132543 | A/Wood_Duck/Minnesota/USDA-009381-001/2022_ H5N1 _2022-03-24              |
| EPI_ISL_18132669 | A/turkey/Minnesota/USDA-011141-003/2022_ H5N1 _2022-04-11                 |
| EPI_ISL_18132727 | A/turkey/Minnesota/USDA-010995-002/2022_ H5N1 _2022-04-09                 |
| EPI_ISL_18132820 | A/turkey/North_Carolina/USDA-009981-003/2022_ H5N1 _2022-03-31            |
| EPI_ISL_18132823 | A/turkey/South_Dakota/USDA-006792-001/2022_ H5N1 _2022-03-04              |
| EPI_ISL_18132846 | A/Bald_Eagle/Ohio/USDA-007697-001/2022_ H5N1 _2022-03-07                  |
| EPI_ISL_18132885 | A/Bald_Eagle/North_Carolina/USDA-006530-002/2022_ H5N1 _2022-02-01        |



|                  |                                                                       |
|------------------|-----------------------------------------------------------------------|
| EPI_ISL_18132927 | A/Bald_Eagle/Florida/USDA-007915-009/2022_ H5N1 _2022-02-23           |
| EPI_ISL_18133046 | A/Backyard_bird/Wyoming/USDA-009326-002/2022_ H5N1 _2022-03-29        |
| EPI_ISL_18133123 | A/Backyard_bird/New_York/USDA-010321-002/2022_ H5N1 _2022-04-04       |
| EPI_ISL_18133135 | A/Backyard_bird/Wisconsin/USDA-013061-005/2022_ H5N1 _2022-04-28      |
| EPI_ISL_18133164 | A/American_White_Pelican/Iowa/USDA-011101-003/2022_ H5N1 _2022-04-12  |
| EPI_ISL_18133169 | A/Lesser_Snow_Goose_White/Iowa/USDA-007679-009/2022_ H5N1 _2022-03-14 |
| EPI_ISL_18133179 | A/Backyard_bird/Minnesota/USDA-013221-001/2022_ H5N1 _2022-04-28      |
| EPI_ISL_18133192 | A/Mallard/North_Carolina/USDA-004008-006/2022_ H5N1 _2022-02-01       |
| EPI_ISL_18133215 | A/Backyard_bird/Michigan/USDA-011121-002/2022_ H5N1 _2022-04-11       |
| EPI_ISL_18133226 | A/Mallard/New_Hampshire/USDA-003417-053/2022_ H5N1 _2022-01-26        |
| EPI_ISL_18133353 | A/Duck/Indiana/USDA-011343-001/2022_ H5N1 _2022-04-12                 |
| EPI_ISL_18133359 | A/Common_Goldeneye/Minnesota/USDA-010028-001/2022_ H5N1 _2022-03-31   |
| EPI_ISL_18133422 | A/goose/Florida/USDA-010682-001/2022_ H5N1 _2022-04-05                |
| EPI_ISL_18133453 | A/Gadwall/North_Carolina/USDA-001330-032/2022_ H5N1 _2022-01-08       |
| EPI_ISL_18133495 | A/Great_Horned_Owl/Wyoming/USDA-010158-002/2022_ H5N1 _2022-04-04     |
| EPI_ISL_18226743 | A/red_fox/Northern_Ireland/22185/2023_ H5N1 _2023-07-26               |
| EPI_ISL_18241795 | A/duck/Vietnam/HU16-DD125/2023_ H5N1 _2023-06-05                      |
| EPI_ISL_18241796 | A/chicken/Vietnam/HU16-DD139/2023_ H5N1 _2023-09-05                   |
| EPI_ISL_18241797 | A/muscovy_duck/Vietnam/HU16-DD144/2023_ H5N1 _2023-06-05              |
| EPI_ISL_18245789 | A/mute_swan/Poland/MB042-22_22VIR5675-6/2022_ H5N1 _2022-01-24        |
| EPI_ISL_18265422 | A/south_american_sea_lion/Peru/AQP-SER00R/2023_ H5N1 _2023-03-06      |
| EPI_ISL_18265431 | A/dolphin/Peru/PIU-SER002/2022_ H5N1 _2022-11-22                      |
| EPI_ISL_18265432 | A/Sanderling/Peru/PIU-SER005/2022_ H5N1 _2022-11-22                   |
| EPI_ISL_18265433 | A/pelican/Peru/PIU-SER013/2022_ H5N1 _2022-11-23                      |
| EPI_ISL_18265436 | A/pelican/Peru/PIU-SER028/2022_ H5N1 _2022-11-24                      |
| EPI_ISL_18284461 | A/chicken/Hokkaido/22A4T/2022_ H5N1 _2022-10-28                       |
| EPI_ISL_18284462 | A/chicken/Hokkaido/22B3C/2022_ H5N1 _2022-11-07                       |
| EPI_ISL_18284467 | A/duck/Wakayama/22A1T/2022_ H5N1 _2022-11-11                          |
| EPI_ISL_18284468 | A/chicken/Aichi/22A3T/2022_ H5N1 _2022-12-05                          |
| EPI_ISL_18284469 | A/chicken/Kagawa/22B2T/2022_ H5N1 _2022-11-22                         |

|                  |                                                                            |
|------------------|----------------------------------------------------------------------------|
| EPI_ISL_18284472 | A/duck/Chiba/22A3T/2022_ H5N1 _2022-11-26                                  |
| EPI_ISL_18284475 | A/chicken/Miyazaki/22B1T/2022_ H5N1 _2022-12-21                            |
| EPI_ISL_18292965 | A/mink/Finland/709/2023_ H5N1 _2023-08-05                                  |
| EPI_ISL_18304169 | A/black-headed_gull/Leningrad_region/RII-WD299/2023_ H5N1 _2023-02-02      |
| EPI_ISL_18310957 | A/black-necked_swan/Uruguay/UDELAR-078-M2/2023_ H5N1 _2023-03-15           |
| EPI_ISL_18310958 | A/black-necked_swan/Uruguay/UDELAR-014-M3/2023_ H5N1 _2023-02-18           |
| EPI_ISL_18310960 | A/backyard_duck/Uruguay/UDELAR-124-M3/2023_ H5N1 _2023-04-16               |
| EPI_ISL_18310962 | A/backyard_chicken/Uruguay/UDELAR-127-M4/2023_ H5N1 _2023-04-17            |
| EPI_ISL_18310965 | A/backyard_chicken/Uruguay/UDELAR-047-M3/2023_ H5N1 _2023-03-06            |
| EPI_ISL_18317757 | A/european_herring_gull/Leningrad_region/RII-WD478S/2023_ H5N1 _2023-08-25 |
| EPI_ISL_18321744 | A/arctic-fox/Finland/HVVI_491_23_23VIR6803-1/2023_ H5N1 _2023-07-06        |
| EPI_ISL_18325122 | A/Curlew/Scotland/097010/2023_ H5N1 _2023-07-20                            |
| EPI_ISL_18371664 | A/Belcher_gull/Peru/UNMSM-A267/2022_ H5N1 _2022-12                         |
| EPI_ISL_18371665 | A/Guanay_cormorant/Peru/UNMSM-A275/2022_ H5N1 _2022-12                     |
| EPI_ISL_18371666 | A/Peruvian_booby/Peru/UNMSM-A296/2022_ H5N1 _2022-12                       |
| EPI_ISL_18373217 | A/Mandarin_duck/Korea/21WF119-1/2021_ H5N1 _2021-11-15                     |
| EPI_ISL_18373218 | A/Mandarin_duck/Korea/21WF91-6/2021_ H5N1 _2021-11-16                      |
| EPI_ISL_18373219 | A/Wild_duck/Korea/21WF124-4/2021_ H5N1 _2021-11-22                         |
| EPI_ISL_18373220 | A/Baikal_teal/Korea/21WF192-9/2021_ H5N1 _2021-12-01                       |
| EPI_ISL_18373221 | A/Wild_duck/Korea/21WF241-1/2021_ H5N1 _2021-12-05                         |
| EPI_ISL_18373222 | A/Wild_duck/Korea/21WF213-1/2021_ H5N1 _2021-12-06                         |
| EPI_ISL_18373223 | A/Wild_duck/Korea/21WF225-24/2021_ H5N1 _2021-12-07                        |
| EPI_ISL_18373227 | A/Spot-billed_duck/Korea/21WS26-3/2022_ H5N1 _2022-01-18                   |
| EPI_ISL_18373228 | A/Eurasian_wigeon/Korea/21WF549-3/2022_ H5N1 _2022-01-19                   |
| EPI_ISL_18373229 | A/Wild_duck/Korea/21WF537-37/2022_ H5N1 _2022-01-21                        |
| EPI_ISL_18373231 | A/Ruddy_shelduck/Korea/21WC127/2022_ H5N1 _2022-01-25                      |
| EPI_ISL_18373232 | A/Spot-billed_duck/Korea/21WC138/2022_ H5N1 _2022-01-25                    |
| EPI_ISL_18373233 | A/Wild_duck/Korea/21WF573-1/2022_ H5N1 _2022-01-26                         |
| EPI_ISL_18373234 | A/Spot-billed_duck/Korea/21WC143/2022_ H5N1 _2022-01-27                    |
| EPI_ISL_18373238 | A/Mallard/Korea/21WC183/2022_ H5N1 _2022-02-07                             |

|                  |                                                            |
|------------------|------------------------------------------------------------|
| EPI_ISL_18373239 | A/Gadwall/Korea/21WC196/2022_ H5N1 _2022-02-04             |
| EPI_ISL_18373240 | A/Bean_goose/Korea/21WC198/2022_ H5N1 _2022-02-10          |
| EPI_ISL_18373245 | A/White-fronted_goose/Korea/21WC244/2022_ H5N1 _2022-02-21 |
| EPI_ISL_18373246 | A/Great_egret/Korea/21WC249/2022_ H5N1 _2022-02-15         |
| EPI_ISL_18373247 | A/White-naped_crane/Korea/21WC257/2022_ H5N1 _2022-02-25   |
| EPI_ISL_18373250 | A/Bean_goose/Korea/21WC279/2022_ H5N1 _2022-03-04          |
| EPI_ISL_18373252 | A/Wild_bird_feces/Korea/21WF729-23/2022_ H5N1 _2022-03-03  |
| EPI_ISL_18373254 | A/White-fronted_goose/Korea/21WC305/2022_ H5N1 _2022-03-04 |
| EPI_ISL_18373258 | A/White-fronted_goose/Korea/21WC344/2022_ H5N1 _2022-03-16 |
| EPI_ISL_18373261 | A/White-fronted_goose/Korea/21WC361/2022_ H5N1 _2022-03-24 |
| EPI_ISL_18378729 | A/Chicken/Scotland/109635/2023_ H5N1 _2023-08-20           |
| EPI_ISL_18497946 | A/duck/Peru/LAM-INS-014/2023_ H5N1 _2023-09-26             |
| EPI_ISL_18698459 | A/Goose/Argentina/389-1/2023_ H5N1 _2023-02-11             |
| EPI_ISL_18698460 | A/Chicken/Argentina/464-4/2023_ H5N1 _2023-02-16           |
| EPI_ISL_18698462 | A/Chicken/Argentina/477-5/2023_ H5N1 _2023-02-18           |
| EPI_ISL_18698464 | A/Chicken/Argentina/481-2/2023_ H5N1 _2023-02-18           |
| EPI_ISL_18698466 | A/Chicken/Argentina/485-6/2023_ H5N1 _2023-02-19           |
| EPI_ISL_18698469 | A/Chicken/Argentina/491-2/2023_ H5N1 _2023-02-20           |
| EPI_ISL_18698471 | A/Chicken/Argentina/501-1/2023_ H5N1 _2023-02-20           |
| EPI_ISL_18698474 | A/Chicken/Argentina/506-2/2023_ H5N1 _2023-02-20           |
| EPI_ISL_18698476 | A/Chicken/Argentina/509-2/2023_ H5N1 _2023-02-21           |
| EPI_ISL_18698478 | A/Chicken/Argentina/556-6/2023_ H5N1 _2023-02-23           |
| EPI_ISL_18698480 | A/Chicken/Argentina/559-8/2023_ H5N1 _2023-02-22           |
| EPI_ISL_18698482 | A/Chicken/Argentina/578-2/2023_ H5N1 _2023-02-23           |
| EPI_ISL_18698485 | A/Avian/Argentina/579-5/2023_ H5N1 _2023-02-24             |
| EPI_ISL_18698487 | A/Avian/Argentina/586-4/2023_ H5N1 _2023-02-24             |
| EPI_ISL_18698490 | A/Chicken/Argentina/588-4/2023_ H5N1 _2023-02-24           |
| EPI_ISL_18698492 | A/Chicken/Argentina/606-1/2023_ H5N1 _2023-02-27           |
| EPI_ISL_18698494 | A/Chicken/Argentina/736-1/2023_ H5N1 _2023-03-03           |
| EPI_ISL_18698497 | A/Turkey/Argentina/753-1/2023_ H5N1 _2023-03-04            |

|                  |                                                    |
|------------------|----------------------------------------------------|
| EPI_ISL_18698502 | A/Chicken/Argentina/919-3/2023_ H5N1 _2023-03-13   |
| EPI_ISL_18698504 | A/Chicken/Argentina/1035-1/2023_ H5N1 _2023-03-16  |
| EPI_ISL_18698505 | A/Chicken/Argentina/1147-2/2023_ H5N1 _2023-03-21  |
| EPI_ISL_18698506 | A/Chicken/Argentina/1200-1/2023_ H5N1 _2023-03-27  |
| EPI_ISL_18698507 | A/Chicken/Argentina/1340-2/2023_ H5N1 _2023-03-31  |
| EPI_ISL_18698508 | A/Turkey/Argentina/1348-3/2023_ H5N1 _2023-03-31   |
| EPI_ISL_18698510 | A/Chicken/Argentina/1416-3/2023_ H5N1 _2023-04-03  |
| EPI_ISL_18698511 | A/Chicken/Argentina/1530-3/2023_ H5N1 _2023-04-12  |
| EPI_ISL_18698512 | A/Chicken/Argentina/1708-1/2023_ H5N1 _2023-04-19  |
| EPI_ISL_18698513 | A/Turkey/Argentina/1710-1/2023_ H5N1 _2023-04-17   |
| EPI_ISL_18698514 | A/Turkey/Argentina/1711-2/2023_ H5N1 _2023-04-19   |
| EPI_ISL_18698515 | A/Duck/Argentina/1712-5/2023_ H5N1 _2023-04-19     |
| EPI_ISL_18698516 | A/Avian/Argentina/1762-2/2023_ H5N1 _2023-04-21    |
| EPI_ISL_18698517 | A/Avian/Argentina/1790-5/2023_ H5N1 _2023-04-24    |
| EPI_ISL_18698518 | A/Chicken/Argentina/1976-2/2023_ H5N1 _2023-05-01  |
| EPI_ISL_18698519 | A/Chicken/Argentina/1984-4/2023_ H5N1 _2023-05-04  |
| EPI_ISL_18698520 | A/Chicken/Argentina/2034-5/2023_ H5N1 _2023-05-05  |
| EPI_ISL_18698521 | A/Chicken/Argentina/2049-3/2023_ H5N1 _2023-05-08  |
| EPI_ISL_18698524 | A/Chicken/Argentina/2305-1/2023_ H5N1 _2023-05-18  |
| EPI_ISL_18698525 | A/Chicken/Argentina/2305-6/2023_ H5N1 _2023-05-18  |
| EPI_ISL_18698526 | A/Chicken/Argentina/2483-3/2023_ H5N1 _2023-05-29  |
| EPI_ISL_18698527 | A/Chicken/Argentina/2796-2/2023_ H5N1 _2023-06-13  |
| EPI_ISL_18698528 | A/Chicken/Argentina/3346-1/2023_ H5N1 _2023-07-06  |
| EPI_ISL_18698529 | A/Chicken/Argentina/3657-2/2023_ H5N1 _2023-07-26  |
| EPI_ISL_18698530 | A/Chicken/Argentina/3695-3/2023_ H5N1 _2023-07-27  |
| EPI_ISL_18698730 | A/Chicken/Argentina/747-1/2023_ H5N1 _2023-03-04   |
| EPI_ISL_18698731 | A/Chicken/Argentina/895-1/2023_ H5N1 _2023-03-09   |
| EPI_ISL_18698732 | A/Chicken/Argentina/2016-2/2023_ H5N1 _2023-05-03  |
| EPI_ISL_18698754 | A/Sea_Lion/Argentina/3849-4/2023_ H5N1 _2023-08-08 |
| EPI_ISL_18698755 | A/Sea_Lion/Argentina/3893-1/2023_ H5N1 _2023-08-11 |

|                  |                                                                        |
|------------------|------------------------------------------------------------------------|
| EPI_ISL_18755251 | A/frigatebird/Rio_de_Janeiro/MAPA-1532N/2023_ H5N1 _2023-06-03         |
| EPI_ISL_18755338 | A/tern/Espirito_Santo/MAPA-1339N2/2023_ H5N1 _2023-05-15               |
| EPI_ISL_18945315 | A/South_American_tern/Argentina/RN-PB015/2023_ H5N1 _2023-08-26        |
| EPI_ISL_18945316 | A/South_American_sea_lion/Argentina/RN-PB013/2023_ H5N1 _2023-08-26    |
| EPI_ISL_18945317 | A/South_American_sea_lion/Argentina/RN-PB011/2023_ H5N1 _2023-08-26    |
| EPI_ISL_18945319 | A/South_American_sea_lion/Argentina/RN-PB007/2023_ H5N1 _2023-08-26    |
| EPI_ISL_18945320 | A/South_American_fur_seal/Argentina/RN-PB019/2023_ H5N1 _2023-08-26    |
| EPI_ISL_2227278  | A/goose/Netherlands/21028502-002/21028502/2021_ H5N1 _2021-05-09       |
| EPI_ISL_4061484  | A/chicken/Nigeria/VRD21-102_21VIR2370-424/2021_ H5N1 _2021-03-01       |
| EPI_ISL_4061485  | A/chicken/Nigeria/VRD21-109_21VIR2370-425/2021_ H5N1 _2021-03-01       |
| EPI_ISL_4061491  | A/chicken/Nigeria/VRD21-98_21VIR2288-6/2021_ H5N1 _2021-02-12          |
| EPI_ISL_5463801  | A/chicken/Saratov/29-07V/2021_ H5N1 _2021-09-30                        |
| EPI_ISL_5463804  | A/chicken/Tyumen/33-45V/2021_ H5N1 _2021-10-07                         |
| EPI_ISL_5804789  | A/great_skua/Scotland/B07779/2021_ H5N1 _2021-07-29                    |
| EPI_ISL_603135   | A/Eurasian_Wigeon/Netherlands/5/2020_ H5N1 _2020-10-16                 |
| EPI_ISL_6328001  | A/greylag_goose/Netherlands/21037497-001/2021_ H5N1 _2021-10-19        |
| EPI_ISL_6328409  | A/mute_swan/Czech_Republic/21312/2021_ H5N1 _2021-11-01                |
| EPI_ISL_6761022  | A/greylag_goose/Netherlands/21038567-002/2021_ H5N1 _2021-11-09        |
| EPI_ISL_6829533  | A/chicken/Kagoshima/21A6T/2021_ H5N1 _2021-11-12                       |
| EPI_ISL_6929958  | A/turkey/Poland/H1910-T3/2021_ H5N1 _2021-11-01                        |
| EPI_ISL_6934175  | A/domestic_duck/Poland/H1942-N/2021_ H5N1 _2021-11-07                  |
| EPI_ISL_6959592  | A/mandarin_duck/Korea/WA585/2021_ H5N1 _2021-10-26                     |
| EPI_ISL_6959593  | A/quail/Korea/H526/2021_ H5N1 _2021-11-08                              |
| EPI_ISL_711055   | A/chicken/Netherlands/20019879-001005/2020_ H5N1 _2020-12-14           |
| EPI_ISL_7626512  | A/chicken/Czech_Republic/23404-2T/2021_ H5N1 _2021-11-25               |
| EPI_ISL_7626532  | A/chicken/Czech_Republic/23589-3/2021_ H5N1 _2021-11-29                |
| EPI_ISL_7683138  | A/red_fox/Netherlands/21040099-007/2021_ H5N1 _2021-12-03              |
| EPI_ISL_7753193  | A/Eurasian_wigeon/Germany-SH/AI05951/2021_ H5N1 _2021-10-14            |
| EPI_ISL_7753251  | A/barnacle_goose/Germany-SH/AI06005/2021_ H5N1 _2021-10-19             |
| EPI_ISL_7753309  | A/lesser_white-fronted_goose/Germany-MV/AI05973/2021_ H5N1 _2021-10-20 |

|                 |                                                                              |
|-----------------|------------------------------------------------------------------------------|
| EPI_ISL_7753367 | A/Eurasian_teal/Germany-BY/AI05977/2021_ H5N1 _2021-10-21                    |
| EPI_ISL_7778754 | A/Withe-tiled_eagle/Estonia/TA2124126-1_21VIR10433-11/2021_ H5N1 _2021-10-12 |
| EPI_ISL_7778768 | A/Eurasian_eagle-owl/Finland/10617_21VIR7689-15/2021_ H5N1 _2021-08-01       |
| EPI_ISL_8215689 | A/Bar-headed_Goose/Tibet/XZ1131/2021_ H5N1 _2021-05-20                       |
| EPI_ISL_8515479 | A/goose/Czech_Republic/22608-2/2021_ H5N1 _2021-11-18                        |
| EPI_ISL_8882172 | A/turkey/Italy/21VIR10851/2021_ H5N1 _2021-12-06                             |
| EPI_ISL_9012457 | A/chicken/England/053052/2021_ H5N1 _2021-10-24                              |
| EPI_ISL_9377021 | A/goose/France/21P014207/2021_ H5N1 _2021-12-23                              |
| EPI_ISL_9603922 | A/mute_swan/Czech_Republic/22684/2021_ H5N1 _2021-11-15                      |
