# Supplementary material for: Detection and spread of high pathogenicity avian influenza virus H5N1 in the Antarctic Region
Source: PubMed Central journal article supplement (PMC11372179; doi:10.1038/s41467-024-51490-8), 2024-09-03
Supplement: 41467_2024_51490_MOESM3_ESM.pdf [file 41467_2024_51490_MOESM3_ESM.pdf]

## Reporting Summary

Nature Portfolio wishes to improve the reproducibility of the work that we publish. This form provides structure for consistency and transparency in reporting. For further information on Nature Portfolio policies, see our [Editorial Policies](#) and the [Editorial Policy Checklist](#).

### Statistics

For all statistical analyses, confirm that the following items are present in the figure legend, table legend, main text, or Methods section.

- |                                     |                                                                                                                                                                                                                                                                                     |
|-------------------------------------|-------------------------------------------------------------------------------------------------------------------------------------------------------------------------------------------------------------------------------------------------------------------------------------|
| n/a                                 | Confirmed                                                                                                                                                                                                                                                                           |
| <input checked="" type="checkbox"/> | <input type="checkbox"/> The exact sample size ( $n$ ) for each experimental group/condition, given as a discrete number and unit of measurement                                                                                                                                    |
| <input checked="" type="checkbox"/> | <input type="checkbox"/> A statement on whether measurements were taken from distinct samples or whether the same sample was measured repeatedly                                                                                                                                    |
| <input checked="" type="checkbox"/> | <input type="checkbox"/> The statistical test(s) used AND whether they are one- or two-sided<br><i>Only common tests should be described solely by name; describe more complex techniques in the Methods section.</i>                                                               |
| <input checked="" type="checkbox"/> | <input type="checkbox"/> A description of all covariates tested                                                                                                                                                                                                                     |
| <input checked="" type="checkbox"/> | <input type="checkbox"/> A description of any assumptions or corrections, such as tests of normality and adjustment for multiple comparisons                                                                                                                                        |
| <input checked="" type="checkbox"/> | <input type="checkbox"/> A full description of the statistical parameters including central tendency (e.g. means) or other basic estimates (e.g. regression coefficient) AND variation (e.g. standard deviation) or associated estimates of uncertainty (e.g. confidence intervals) |
| <input checked="" type="checkbox"/> | <input type="checkbox"/> For null hypothesis testing, the test statistic (e.g. $F$ , $t$ , $r$ ) with confidence intervals, effect sizes, degrees of freedom and $P$ value noted<br><i>Give <math>P</math> values as exact values whenever suitable.</i>                            |
| <input type="checkbox"/>            | <input checked="" type="checkbox"/> For Bayesian analysis, information on the choice of priors and Markov chain Monte Carlo settings                                                                                                                                                |
| <input checked="" type="checkbox"/> | <input type="checkbox"/> For hierarchical and complex designs, identification of the appropriate level for tests and full reporting of outcomes                                                                                                                                     |
| <input checked="" type="checkbox"/> | <input type="checkbox"/> Estimates of effect sizes (e.g. Cohen's $d$ , Pearson's $r$ ), indicating how they were calculated                                                                                                                                                         |

*Our web collection on [statistics for biologists](#) contains articles on many of the points above.*

### Software and code

Policy information about [availability of computer code](#)

Data collection

Data analysis 

April 2023

packages GGPLOT2, rnatuarearth, rnatuarearth data and sf. Nucleotide identity between sequences was determined as described previously<sup>82</sup>. Sequences were genotyped according to the USDA schema, using the GenoFLU tool (<https://github.com/USDA-VS/GenoFLU>)

For manuscripts utilizing custom algorithms or software that are central to the research but not yet described in published literature, software must be made available to editors and reviewers. We strongly encourage code deposition in a community repository (e.g. GitHub). See the Nature Portfolio [guidelines for submitting code & software](#) for further information.

## Data

Policy information about [availability of data](#)

All manuscripts must include a [data availability statement](#). This statement should provide the following information, where applicable:

- Accession codes, unique identifiers, or web links for publicly available datasets
- A description of any restrictions on data availability
- For clinical datasets or third party data, please ensure that the statement adheres to our [policy](#)

Sequence data is hosted on public accessible databases. All code used in data analysis is either published or hosted on github.

## Research involving human participants, their data, or biological material

Policy information about studies with [human participants or human data](#). See also policy information about [sex, gender \(identity/presentation\), and sexual orientation](#) and [race, ethnicity and racism](#).

|                                                                    |     |
|--------------------------------------------------------------------|-----|
| Reporting on sex and gender                                        | N/A |
| Reporting on race, ethnicity, or other socially relevant groupings | N/A |
| Population characteristics                                         | N/A |
| Recruitment                                                        | N/A |
| Ethics oversight                                                   | N/A |

Note that full information on the approval of the study protocol must also be provided in the manuscript.

## Field-specific reporting

Please select the one below that is the best fit for your research. If you are not sure, read the appropriate sections before making your selection.

- Life sciences       Behavioural & social sciences       Ecological, evolutionary & environmental sciences

For a reference copy of the document with all sections, see [nature.com/documents/nr-reporting-summary-flat.pdf](https://www.nature.com/documents/nr-reporting-summary-flat.pdf)

## Ecological, evolutionary & environmental sciences study design

All studies must disclose on these points even when the disclosure is negative.

|                          |                                                                                                                                                                                                                                 |
|--------------------------|---------------------------------------------------------------------------------------------------------------------------------------------------------------------------------------------------------------------------------|
| Study description        | Assessment of morality events on islands in the Antarctic region for evidence of high pathogenicity avian influenza infection. Critical assessment of potential incursion of a significant pathogen into a vulnerable ecosystem |
| Research sample          | Birds and animals were sampled where mortalities or clinical disease was evident                                                                                                                                                |
| Sampling strategy        | Sampling was only conducted where safe to do so and to minimize potential pathogen spread by fomite transfer to healthy animals.                                                                                                |
| Data collection          | Data was collected by staff on the ground to define location, species and approximate age.                                                                                                                                      |
| Timing and spatial scale | Accessibility of these areas is challenging so samples were taken where mortality events, or clinical disease, was observed.                                                                                                    |
| Data exclusions          | No data were excluded                                                                                                                                                                                                           |
| Reproducibility          | All diagnostic assessments were undertaken within a UKAS accredited ISO:17025 framework and the National Reference Laboratory for Avian influenza in the UK                                                                     |
| Randomization            | This is not relevant as we were sampling at a disease outbreak in a sensitive site.                                                                                                                                             |
| Blinding                 | This is not relevant as we were sampling at a disease outbreak in a sensitive site. However, samples submitted were blinded with respect to species and location for testing.                                                   |

Did the study involve field work?  Yes  No

## Field work, collection and transport

|                        |                                                                                                                                                                          |
|------------------------|--------------------------------------------------------------------------------------------------------------------------------------------------------------------------|
| Field conditions       | Weather as standard for location and season.                                                                                                                             |
| Location               | Islands within the Antarctic region as described in the manuscript where all locations are stated.                                                                       |
| Access & import/export | All samples collected with permissions from the Falkland Islands government and the government of South Georgia through collaboration with the British Antarctic survey. |
| Disturbance            | Minimal disturbance as described above as critical to avoid further pathogens spread. Skilled ornithologists/field staff were collecting samples.                        |

## Reporting for specific materials, systems and methods

We require information from authors about some types of materials, experimental systems and methods used in many studies. Here, indicate whether each material, system or method listed is relevant to your study. If you are not sure if a list item applies to your research, read the appropriate section before selecting a response.

### Materials & experimental systems

| n/a                                 | Included in the study                                           |
|-------------------------------------|-----------------------------------------------------------------|
| <input checked="" type="checkbox"/> | <input type="checkbox"/> Antibodies                             |
| <input checked="" type="checkbox"/> | <input type="checkbox"/> Eukaryotic cell lines                  |
| <input checked="" type="checkbox"/> | <input type="checkbox"/> Palaeontology and archaeology          |
| <input type="checkbox"/>            | <input checked="" type="checkbox"/> Animals and other organisms |
| <input checked="" type="checkbox"/> | <input type="checkbox"/> Clinical data                          |
| <input checked="" type="checkbox"/> | <input type="checkbox"/> Dual use research of concern           |
| <input checked="" type="checkbox"/> | <input type="checkbox"/> Plants                                 |

### Methods

| n/a                                 | Included in the study                           |
|-------------------------------------|-------------------------------------------------|
| <input checked="" type="checkbox"/> | <input type="checkbox"/> ChIP-seq               |
| <input checked="" type="checkbox"/> | <input type="checkbox"/> Flow cytometry         |
| <input checked="" type="checkbox"/> | <input type="checkbox"/> MRI-based neuroimaging |

## Animals and other research organisms

Policy information about [studies involving animals](#); [ARRIVE guidelines](#) recommended for reporting animal research, and [Sex and Gender in Research](#)

|                         |                                                                                                                                                                                                                |
|-------------------------|----------------------------------------------------------------------------------------------------------------------------------------------------------------------------------------------------------------|
| Laboratory animals      | N/A                                                                                                                                                                                                            |
| Wild animals            | Wild birds and mammal samples within the regions described as part of an outbreak assessment for infectious avian influenza virus                                                                              |
| Reporting on sex        | Carcasses of birds and animals that had died in te areas were sampled. Sex wasn't necessarily defined                                                                                                          |
| Field-collected samples | Samples were collected from the field and shipped at ambient temperature to the Animal and Plant Health Agency lab in Weybridge, UK, for diagnostic assessment.                                                |
| Ethics oversight        | Only dead animals were sampled. However, all work undertaken on live animals in the UK of as part of a diagnostic evaluation abroad are done under strict ethical guidelines according to Home Office licenses |

Note that full information on the approval of the study protocol must also be provided in the manuscript.

## Plants

---

Seed stocks

N/A

Novel plant genotypes

N/A

Authentication

N/A
